# Supplementary material
Source: PubMed Central journal article supplement (PMC8057738)
Supplement: mmc1.pdf [file mmc1.pdf]

**Supplemental information**

**Transmission, infectivity, and neutralization of a spike L452R SARS-CoV-2 variant**

**Xianding Deng, Miguel A. Garcia-Knight, Mir M. Khalid, Venice Servellita, Candace Wang, Mary Kate Morris, Alicia Sotomayor-González, Dustin R. Glasner, Kevin R. Reyes, Amelia S. Gliwa, Nikitha P. Reddy, Claudia Sanchez San Martin, Scot Federman, Jing Cheng, Joanna Balcerek, Jordan Taylor, Jessica A. Streithorst, Steve Miller, Bharath Sreekumar, Pei-Yi Chen, Ursula Schulze-Gahmen, Taha Y. Taha, Jennifer M. Hayashi, Camille R. Simoneau, G. Renuka Kumar, Sarah McMahon, Peter V. Lidsky, Yinghong Xiao, Peera Hemarajata, Nicole M. Green, Alex Espinosa, Chantha Kath, Monica Haw, John Bell, Jill K. Hacker, Carl Hanson, Debra A. Wadford, Carlos Anaya, Donna Ferguson, Phillip A. Frankino, Haridha Shivram, Liana F. Lareau, Stacia K. Wyman, Melanie Ott, Raul Andino, and Charles Y. Chiu**

**Table S2. List of California counties and the B.1.427/B.1.429 genomes sequenced from each county, related to Figure 1.**

| Name of county        | # of genomes<br>(total n=2,172) | # of B.1.427/B.1.429<br>genomes (total n=466) | % of B.1.427/B.1.429<br>genomes |
|-----------------------|---------------------------------|-----------------------------------------------|---------------------------------|
| Santa Clara County    | 725                             | 134                                           | 18.5%                           |
| Alameda County        | 228                             | 71                                            | 31.1%                           |
| Los Angeles County    | 168                             | 54                                            | 32.1%                           |
| San Francisco County  | 155                             | 32                                            | 20.6%                           |
| Madera County         | 100                             | 1                                             | 1.0%                            |
| Contra Costa County   | 97                              | 31                                            | 32.0%                           |
| Monterey County       | 88                              | 65                                            | 73.9%                           |
| San Diego County      | 87                              | 6                                             | 6.9%                            |
| Mono County           | 68                              | 13                                            | 19.1%                           |
| Lake County           | 50                              | 11                                            | 22.0%                           |
| Marin County          | 38                              | 7                                             | 18.4%                           |
| Mendocino County      | 34                              | 0                                             | 0.0%                            |
| Fresno County         | 32                              | 2                                             | 6.3%                            |
| San Mateo County      | 31                              | 6                                             | 19.4%                           |
| Imperial County       | 30                              | 2                                             | 6.7%                            |
| San Joaquin County    | 28                              | 3                                             | 10.7%                           |
| Sonoma County         | 24                              | 3                                             | 12.5%                           |
| Sutter County         | 24                              | 1                                             | 4.2%                            |
| Stanislaus County     | 21                              | 5                                             | 23.8%                           |
| Merced County         | 19                              | 5                                             | 26.3%                           |
| Solano County         | 16                              | 1                                             | 6.3%                            |
| San Bernardino County | 10                              | 2                                             | 20.0%                           |
| Shasta County         | 10                              | 0                                             | 0.0%                            |
| Sacramento County     | 9                               | 0                                             | 0.0%                            |
| Riverside County      | 8                               | 1                                             | 12.5%                           |
| Butte County          | 7                               | 0                                             | 0.0%                            |
| El Dorado County      | 7                               | 0                                             | 0.0%                            |
| Yuba County           | 7                               | 0                                             | 0.0%                            |
| Nevada County         | 6                               | 1                                             | 16.7%                           |
| Placer County         | 5                               | 0                                             | 0.0%                            |
| Santa Cruz County     | 4                               | 1                                             | 25.0%                           |
| Tulare County         | 4                               | 1                                             | 25.0%                           |
| Yolo County           | 4                               | 0                                             | 0.0%                            |
| Kings County          | 3                               | 1                                             | 33.3%                           |
| Napa County           | 3                               | 1                                             | 33.3%                           |
| Tehama County         | 3                               | 1                                             | 33.3%                           |
| Humboldt County       | 2                               | 0                                             | 0.0%                            |
| Mariposa County       | 2                               | 1                                             | 50.0%                           |
| San Benito County     | 2                               | 1                                             | 50.0%                           |
| Ventura County        | 2                               | 1                                             | 50.0%                           |
| Amador County         | 1                               | 0                                             | 0.0%                            |
| Orange County         | 1                               | 0                                             | 0.0%                            |
| Santa Barbara County  | 1                               | 0                                             | 0.0%                            |
| Tuolumne County       | 1                               | 0                                             | 0.0%                            |
| Unknown County        | 7                               | 1                                             | 14.3%                           |

**Table S3. Plasma samples from convalescent COVID-19 patients and SARS-CoV-2 vaccine recipients used for evaluating neutralizing activity against B.1.427 and B.1.429 lineage viruses, related to Figure 5.**

| #  | Sample Type              | Vaccine type        | Days post symptom onset | Days post second dose | PRNT50 (WA1) | PRNT50 (B.1.427, #1-21 or B.1.429, #22-31) | PRNT50 (D614G) |
|----|--------------------------|---------------------|-------------------------|-----------------------|--------------|--------------------------------------------|----------------|
| 1  | Convalescent Plasma      | -                   | 60                      | -                     | 3200         | 800                                        | NT             |
| 2  | Convalescent Plasma      | -                   | 18                      | -                     | ND           | ND                                         | NT             |
| 3  | Convalescent Plasma      | -                   | 70                      | -                     | 3200         | 3200                                       | NT             |
| 4  | Convalescent Plasma      | -                   | 71                      | -                     | 800          | 200                                        | NT             |
| 5  | Convalescent Plasma      | -                   | 15                      | -                     | 400          | 100                                        | NT             |
| 6  | Convalescent Plasma      | -                   | 49                      | -                     | 800          | 100                                        | 800            |
| 7  | Convalescent Plasma      | -                   | 23                      | -                     | 800          | 100                                        | 800            |
| 8  | Convalescent Plasma      | -                   | 36                      | -                     | 3200         | 1600                                       | 3200           |
| 9  | Convalescent Plasma      | -                   | 31                      | -                     | 3200         | 400                                        | 3200           |
| 10 | Vaccine Recipient Plasma | BNT162b2 (Pfizer)   | -                       | 28                    | 800          | 800                                        | NT             |
| 11 | Vaccine Recipient Plasma | mRNA-1273 (Moderna) | -                       | 4                     | 100          | 100                                        | NT             |
| 12 | Vaccine Recipient Plasma | BNT162b2 (Pfizer)   | -                       | 14                    | 800          | 400                                        | NT             |
| 13 | Vaccine Recipient Plasma | mRNA-1273 (Moderna) | -                       | 4                     | 200          | 100                                        | NT             |
| 14 | Vaccine Recipient Plasma | mRNA-1273 (Moderna) | -                       | 14                    | ND           | ND                                         | NT             |
| 15 | Vaccine Recipient Plasma | mRNA-1273 (Moderna) | -                       | 18                    | 1600         | 800                                        | NT             |
| 16 | Vaccine Recipient Plasma | mRNA-1273 (Moderna) | -                       | 10                    | 800          | 400                                        | NT             |
| 17 | Vaccine Recipient Plasma | mRNA-1273 (Moderna) | -                       | 10                    | 3200         | 1600                                       | NT             |
| 18 | Vaccine Recipient Plasma | mRNA-1273 (Moderna) | -                       | 11                    | 3200         | 1600                                       | NT             |
| 19 | Vaccine Recipient Plasma | BNT162b2 (Pfizer)   | -                       | 15                    | 200          | 100                                        | 400            |
| 20 | Vaccine Recipient Plasma | mRNA-1273 (Moderna) | -                       | 7                     | 400          | 100                                        | 400            |
| 21 | Vaccine Recipient Plasma | mRNA-1273 (Moderna) | -                       | 5                     | 400          | 400                                        | 400            |
| 22 | Convalescent Plasma      | -                   | -                       | 55                    | 2560         | 2560                                       | 2560           |
| 23 | Convalescent Plasma      | -                   | -                       | 44                    | 1280         | 640                                        | 2560           |
| 24 | Convalescent Plasma      | -                   | -                       | 85                    | 320          | 160                                        | 320            |
| 25 | Convalescent Plasma      | -                   | -                       | 72                    | 640          | 40                                         | 160            |
| 26 | Convalescent Plasma      | -                   | -                       | 62                    | 320          | 80                                         | 320            |
| 27 | Convalescent Plasma      | -                   | -                       | 56                    | 1280         | 640                                        | 2560           |
| 28 | Convalescent Plasma      | -                   | -                       | 21                    | 1280         | 640                                        | 1280           |
| 29 | Convalescent Plasma      | -                   | -                       | 72                    | 1280         | 160                                        | 640            |
| 30 | Convalescent Plasma      | -                   | -                       | 30                    | 1280         | 320                                        | 2560           |
| 31 | Convalescent Plasma      | -                   | -                       | 42                    | 640          | 80                                         | 320            |

Abbreviations: PRNT, plaque reduction neutralization tests; ND, antibody neutralization not detected; NT, not tested; "-", not applicable.

**Table S4. Sensitivity analysis exploring the effect of varying the serial interval on the calculated logistic growth rate, increase in transmission rate, and doubling time for B.1.427/B.1.429 cases in California, related to STAR Methods.**

| Serial interval (days) | logistic growth rate per day | increase in transmission (%) | CI range    | doubling time (days) | CI range (doubling time) | 50% date | CI width (transmission rate) |
|------------------------|------------------------------|------------------------------|-------------|----------------------|--------------------------|----------|------------------------------|
| 3                      | 0.0363                       | 10.88                        | 9.71-12.06  | 19.11                | 17.25-21.42              | 1/25/21  | 2.35                         |
| 3.5                    | 0.0363                       | 12.7                         | 11.33-14.06 | 19.11                | 17.25-21.42              | 1/25/21  | 2.73                         |
| 4                      | 0.0363                       | 14.51                        | 12.94-16.07 | 19.11                | 17.25-21.42              | 1/25/21  | 3.13                         |
| 4.5                    | 0.0363                       | 16.32                        | 14.56-18.08 | 19.11                | 17.25-21.42              | 1/25/21  | 3.52                         |
| 5                      | 0.0363                       | 18.14                        | 16.18-20.09 | 19.11                | 17.25-21.42              | 1/25/21  | 3.91                         |
| 5.5                    | 0.0363                       | 19.95                        | 17.80-22.10 | 19.11                | 17.25-21.42              | 1/25/21  | 4.31                         |
| 6                      | 0.0363                       | 21.76                        | 19.42-24.11 | 19.11                | 17.25-21.42              | 1/25/21  | 4.69                         |
| 6.5                    | 0.0363                       | 23.58                        | 21.03-26.12 | 19.11                | 17.25-21.42              | 1/25/21  | 5.09                         |
| 7                      | 0.0363                       | 25.39                        | 22-65-28.13 | 19.11                | 17.25-21.42              | 1/25/21  | 5.48                         |

Abbreviations: CI, confidence interval.
