# Supplementary material
Source: PubMed Central journal article supplement (PMC8057738)
Supplement: mmc3.pdf [file mmc3.pdf]

We gratefully acknowledge the following Authors from the Originating laboratories responsible for obtaining the specimens, as well as the Submitting laboratories where the genome data were generated and shared via GISAID, on which this research is based.

All Submitters of data may be contacted directly via [www.gisaid.org](http://www.gisaid.org)

Authors are sorted alphabetically.

| Accession ID                                                                                                                                                                                                                                                                                                                                                                                                                                                                                                                                                                                                                                                                                                                                                                                                                                                                                                                                                                                                                                                                                                                                                                                                                                                                                                                                                                                                                                                                                        | Originating Laboratory                      | Submitting Laboratory                                                                              | Authors                                                                                                                                                                                                                                                                                                                                                                                                                                                                                                                                                                                        |
|-----------------------------------------------------------------------------------------------------------------------------------------------------------------------------------------------------------------------------------------------------------------------------------------------------------------------------------------------------------------------------------------------------------------------------------------------------------------------------------------------------------------------------------------------------------------------------------------------------------------------------------------------------------------------------------------------------------------------------------------------------------------------------------------------------------------------------------------------------------------------------------------------------------------------------------------------------------------------------------------------------------------------------------------------------------------------------------------------------------------------------------------------------------------------------------------------------------------------------------------------------------------------------------------------------------------------------------------------------------------------------------------------------------------------------------------------------------------------------------------------------|---------------------------------------------|----------------------------------------------------------------------------------------------------|------------------------------------------------------------------------------------------------------------------------------------------------------------------------------------------------------------------------------------------------------------------------------------------------------------------------------------------------------------------------------------------------------------------------------------------------------------------------------------------------------------------------------------------------------------------------------------------------|
| EPI_ISL_1001005, EPI_ISL_1001006, EPI_ISL_1001007, EPI_ISL_1001008, EPI_ISL_1001009, EPI_ISL_1001035, EPI_ISL_1001037, EPI_ISL_1001038, EPI_ISL_1001039                                                                                                                                                                                                                                                                                                                                                                                                                                                                                                                                                                                                                                                                                                                                                                                                                                                                                                                                                                                                                                                                                                                                                                                                                                                                                                                                             | Santa Clara County Public Health Laboratory | Santa Clara County Public Health Laboratory                                                        | Santa Clara County Public Health Department                                                                                                                                                                                                                                                                                                                                                                                                                                                                                                                                                    |
| EPI_ISL_1005485                                                                                                                                                                                                                                                                                                                                                                                                                                                                                                                                                                                                                                                                                                                                                                                                                                                                                                                                                                                                                                                                                                                                                                                                                                                                                                                                                                                                                                                                                     | Los Angeles County PHL                      | Los Angeles County PHL                                                                             | P. Hemarajata et al.                                                                                                                                                                                                                                                                                                                                                                                                                                                                                                                                                                           |
| EPI_ISL_1005501, EPI_ISL_1005503                                                                                                                                                                                                                                                                                                                                                                                                                                                                                                                                                                                                                                                                                                                                                                                                                                                                                                                                                                                                                                                                                                                                                                                                                                                                                                                                                                                                                                                                    | USC Clinical Lab                            | Los Angeles County PHL                                                                             | P. Hemarajata et al.                                                                                                                                                                                                                                                                                                                                                                                                                                                                                                                                                                           |
| EPI_ISL_1005549, EPI_ISL_1005550, EPI_ISL_1005551, EPI_ISL_1005552, EPI_ISL_1005553                                                                                                                                                                                                                                                                                                                                                                                                                                                                                                                                                                                                                                                                                                                                                                                                                                                                                                                                                                                                                                                                                                                                                                                                                                                                                                                                                                                                                 | UCLA Clinical Micro Lab                     | Los Angeles County PHL                                                                             | P. Hemarajata et al.                                                                                                                                                                                                                                                                                                                                                                                                                                                                                                                                                                           |
| EPI_ISL_1009664                                                                                                                                                                                                                                                                                                                                                                                                                                                                                                                                                                                                                                                                                                                                                                                                                                                                                                                                                                                                                                                                                                                                                                                                                                                                                                                                                                                                                                                                                     | Santa Clara County Public Health Laboratory | Santa Clara County Public Health Laboratory                                                        | Santa Clara County Public Health Department                                                                                                                                                                                                                                                                                                                                                                                                                                                                                                                                                    |
| EPI_ISL_1016604, EPI_ISL_1016606, EPI_ISL_1016608, EPI_ISL_1016609, EPI_ISL_1016610, EPI_ISL_1016611, EPI_ISL_1016612, EPI_ISL_1016618, EPI_ISL_1016621                                                                                                                                                                                                                                                                                                                                                                                                                                                                                                                                                                                                                                                                                                                                                                                                                                                                                                                                                                                                                                                                                                                                                                                                                                                                                                                                             | Helix/Illumina                              | Respiratory Viruses Branch, Division of Viral Diseases, Centers for Disease Control and Prevention | Peter W. Cook, Dakota Howard, Dhvani Batra, Ben L. Rambo-Martin, Eileen de Feo, Jan Antico, Christine Tran, Matthew Tolentino, Shannon Wickline, Kim Gietzen, Brad Sickler, Jingtao Liu, Eric Allen, Phil Febbo, Summer Galloway, Nicole L. Washington, Simon White, Geraint Levan, Kelly Schiabor Barrett, Elizabeth Cirulli, Alexandre Bolze, Ary Ascencio, Charlotte Rivera-Garcia, Ryan Cho, Jason Nguyen, Sherry Wang, Jimmy Ramirez, Tyler Cassens, Eren Sandoval, Magnus Isaksson, William Lee, David Becker, Marc Laurent, James Lu, Clinton R. Paden, Suxiang Tong, Duncan MacCannell |
| EPI_ISL_1038283, EPI_ISL_1038675, EPI_ISL_1038678, EPI_ISL_1038681, EPI_ISL_1038682, EPI_ISL_1038683, EPI_ISL_1038684, EPI_ISL_1038685, EPI_ISL_1038686, EPI_ISL_1038687, EPI_ISL_1038690, EPI_ISL_1038691, EPI_ISL_1038692, EPI_ISL_1038693, EPI_ISL_1038694, EPI_ISL_1038695, EPI_ISL_1038699                                                                                                                                                                                                                                                                                                                                                                                                                                                                                                                                                                                                                                                                                                                                                                                                                                                                                                                                                                                                                                                                                                                                                                                                     | see above                                   | Laboratory Corporation of America                                                                  | Respiratory Viruses Branch, Division of Viral Diseases, Centers for Disease Control and Prevention                                                                                                                                                                                                                                                                                                                                                                                                                                                                                             |
| EPI_ISL_1040051                                                                                                                                                                                                                                                                                                                                                                                                                                                                                                                                                                                                                                                                                                                                                                                                                                                                                                                                                                                                                                                                                                                                                                                                                                                                                                                                                                                                                                                                                     | USC Clinical Lab                            | Los Angeles County PHL                                                                             | P. Hemarajata et al.                                                                                                                                                                                                                                                                                                                                                                                                                                                                                                                                                                           |
| EPI_ISL_1040054, EPI_ISL_1040055, EPI_ISL_1040056, EPI_ISL_1040058, EPI_ISL_1040059, EPI_ISL_1040062, EPI_ISL_1040063, EPI_ISL_1040064, EPI_ISL_1040067, EPI_ISL_1040069, EPI_ISL_1040071                                                                                                                                                                                                                                                                                                                                                                                                                                                                                                                                                                                                                                                                                                                                                                                                                                                                                                                                                                                                                                                                                                                                                                                                                                                                                                           | see above                                   | UCLA Clinical Micro Lab                                                                            | Los Angeles County PHL                                                                                                                                                                                                                                                                                                                                                                                                                                                                                                                                                                         |
| EPI_ISL_1060099, EPI_ISL_1060161, EPI_ISL_1060162, EPI_ISL_1060163, EPI_ISL_1060164, EPI_ISL_1060165, EPI_ISL_1060166, EPI_ISL_1060167, EPI_ISL_1060168, EPI_ISL_1060169, EPI_ISL_1060170, EPI_ISL_1060171, EPI_ISL_1060172, EPI_ISL_1060173, EPI_ISL_1060174, EPI_ISL_1060175, EPI_ISL_1060176, EPI_ISL_1060177, EPI_ISL_1060178, EPI_ISL_1060179, EPI_ISL_1060180, EPI_ISL_1060181, EPI_ISL_1060182, EPI_ISL_1060183, EPI_ISL_1060184, EPI_ISL_1060185, EPI_ISL_1060186, EPI_ISL_1060187, EPI_ISL_1060188, EPI_ISL_1060189, EPI_ISL_1060190, EPI_ISL_1060191                                                                                                                                                                                                                                                                                                                                                                                                                                                                                                                                                                                                                                                                                                                                                                                                                                                                                                                                      | see above                                   | Innovative Genomics Institute, UC Berkeley                                                         | Innovative Genomics Institute, UC Berkeley                                                                                                                                                                                                                                                                                                                                                                                                                                                                                                                                                     |
| EPI_ISL_1060550, EPI_ISL_1060551, EPI_ISL_1060552                                                                                                                                                                                                                                                                                                                                                                                                                                                                                                                                                                                                                                                                                                                                                                                                                                                                                                                                                                                                                                                                                                                                                                                                                                                                                                                                                                                                                                                   | Santa Clara County Public Health Laboratory | Santa Clara County Public Health Laboratory                                                        | Santa Clara County Public Health Department                                                                                                                                                                                                                                                                                                                                                                                                                                                                                                                                                    |
| EPI_ISL_1081083                                                                                                                                                                                                                                                                                                                                                                                                                                                                                                                                                                                                                                                                                                                                                                                                                                                                                                                                                                                                                                                                                                                                                                                                                                                                                                                                                                                                                                                                                     | Helix/Illumina                              | Respiratory Viruses Branch, Division of Viral Diseases, Centers for Disease Control and Prevention | Peter W. Cook, Dakota Howard, Dhvani Batra, Ben L. Rambo-Martin, Eileen de Feo, Jan Antico, Christine Tran, Matthew Tolentino, Shannon Wickline, Kim Gietzen, Brad Sickler, Jingtao Liu, Eric Allen, Phil Febbo, Summer Galloway, Nicole L. Washington, Simon White, Geraint Levan, Kelly Schiabor Barrett, Elizabeth Cirulli, Alexandre Bolze, Ary Ascencio, Charlotte Rivera-Garcia, Ryan Cho, Jason Nguyen, Sherry Wang, Jimmy Ramirez, Tyler Cassens, Eren Sandoval, Magnus Isaksson, William Lee, David Becker, Marc Laurent, James Lu, Clinton R. Paden, Suxiang Tong, Duncan MacCannell |
| EPI_ISL_1086566, EPI_ISL_1086639, EPI_ISL_1086650, EPI_ISL_1087439, EPI_ISL_1087517, EPI_ISL_1087525, EPI_ISL_1087541, EPI_ISL_1087628, EPI_ISL_1087633, EPI_ISL_1087634, EPI_ISL_1087636, EPI_ISL_1087651, EPI_ISL_1087655, EPI_ISL_1087656, EPI_ISL_1087659, EPI_ISL_1087661, EPI_ISL_1087663, EPI_ISL_1087667, EPI_ISL_1087669, EPI_ISL_1087675, EPI_ISL_1087679, EPI_ISL_1087684, EPI_ISL_1087693, EPI_ISL_1087727, EPI_ISL_1087755, EPI_ISL_1087760, EPI_ISL_1087768, EPI_ISL_1088094, EPI_ISL_1088107, EPI_ISL_1088111, EPI_ISL_1088115, EPI_ISL_1088117, EPI_ISL_1088123, EPI_ISL_1088124, EPI_ISL_1088140, EPI_ISL_1088142, EPI_ISL_1088143, EPI_ISL_1088152, EPI_ISL_1088170, EPI_ISL_1088188, EPI_ISL_1088192, EPI_ISL_1088196, EPI_ISL_1088210, EPI_ISL_1088211, EPI_ISL_1088216, EPI_ISL_1088231, EPI_ISL_1088232, EPI_ISL_1088239, EPI_ISL_1088271, EPI_ISL_1088299, EPI_ISL_1088333, EPI_ISL_1088354, EPI_ISL_1088402, EPI_ISL_1088409, EPI_ISL_1088411, EPI_ISL_1088414, EPI_ISL_1088416, EPI_ISL_1088428, EPI_ISL_1088439, EPI_ISL_1088445, EPI_ISL_1088448, EPI_ISL_1088455, EPI_ISL_1088456, EPI_ISL_1088469, EPI_ISL_1088474, EPI_ISL_1088478, EPI_ISL_1088479, EPI_ISL_1088489, EPI_ISL_1088494, EPI_ISL_1088495, EPI_ISL_1088499, EPI_ISL_1088501, EPI_ISL_1088502, EPI_ISL_1088503, EPI_ISL_1088509, EPI_ISL_1088513, EPI_ISL_1088514, EPI_ISL_1088516, EPI_ISL_1088520, EPI_ISL_1088521, EPI_ISL_1088525, EPI_ISL_1088530, EPI_ISL_1088533, EPI_ISL_1088539, EPI_ISL_1088543 | see above                                   | Quest Diagnostics Incorporated                                                                     | Respiratory Viruses Branch, Division of Viral Diseases, Centers for Disease Control and Prevention                                                                                                                                                                                                                                                                                                                                                                                                                                                                                             |
| EPI_ISL_1088900, EPI_ISL_1088901, EPI_ISL_1088903, EPI_ISL_1088904, EPI_ISL_1088913, EPI_ISL_1088914, EPI_ISL_1088933, EPI_ISL_1088956, EPI_ISL_1088965, EPI_ISL_1088967, EPI_ISL_1088974, EPI_ISL_1088979, EPI_ISL_1088995, EPI_ISL_1088997, EPI_ISL_1088999, EPI_ISL_1089000, EPI_ISL_1089001, EPI_ISL_1089004, EPI_ISL_1089007, EPI_ISL_1089012, EPI_ISL_1089027, EPI_ISL_1089050, EPI_ISL_1089053, EPI_ISL_1089080, EPI_ISL_1089086, EPI_ISL_1089090, EPI_ISL_1089101, EPI_ISL_1089108, EPI_ISL_1089117, EPI_ISL_1089118, EPI_ISL_1089127, EPI_ISL_1089136, EPI_ISL_1089138, EPI_ISL_1089148, EPI_ISL_1089152, EPI_ISL_1089153, EPI_ISL_1089154, EPI_ISL_1089155, EPI_ISL_1089157, EPI_ISL_1089159, EPI_ISL_1089171, EPI_ISL_1089173, EPI_ISL_1089185, EPI_ISL_1089197, EPI_ISL_1089198, EPI_ISL_1089207, EPI_ISL_1089212, EPI_ISL_1089214, EPI_ISL_1089215, EPI_ISL_1089216, EPI_ISL_1089221, EPI_ISL_1089222, EPI_ISL_1089239, EPI_ISL_1089244, EPI_ISL_1089258, EPI_ISL_1089260, EPI_ISL_1089262, EPI_ISL_1089429, EPI_ISL_1089430, EPI_ISL_1089433                                                                                                                                                                                                                                                                                                                                                                                                                                          | see above                                   | Helix / Illumina                                                                                   | Respiratory Viruses Branch, Division of Viral Diseases, Centers for Disease Control and Prevention                                                                                                                                                                                                                                                                                                                                                                                                                                                                                             |
| EPI_ISL_1090327, EPI_ISL_1090351, EPI_ISL_1090370, EPI_ISL_1090397, EPI_ISL_1090426, EPI_ISL_1090496, EPI_ISL_1090520, EPI_ISL_1090522, EPI_ISL_1090559, EPI_ISL_1090562, EPI_ISL_1090565, EPI_ISL_1090568, EPI_ISL_1090595, EPI_ISL_1090618, EPI_ISL_1090619, EPI_ISL_1090624, EPI_ISL_1090679, EPI_ISL_1090684, EPI_ISL_1090702, EPI_ISL_1090713, EPI_ISL_1090714, EPI_ISL_1090715, EPI_ISL_1090716, EPI_ISL_1090717, EPI_ISL_1090718, EPI_ISL_1090719, EPI_ISL_1090721, EPI_ISL_1090723, EPI_ISL_1090724, EPI_ISL_1090725, EPI_ISL_1090726, EPI_ISL_1090727, EPI_ISL_1090728, EPI_ISL_1090730, EPI_ISL_1090731, EPI_ISL_1090733, EPI_ISL_1090758, EPI_ISL_1090782, EPI_ISL_1090865, EPI_ISL_1090880, EPI_ISL_1090881, EPI_ISL_1090950, EPI_ISL_1090951, EPI_ISL_1090952, EPI_ISL_1090953, EPI_ISL_1090955, EPI_ISL_1090956, EPI_ISL_1090957, EPI_ISL_1090959, EPI_ISL_1090960, EPI_ISL_1090961, EPI_ISL_1090962, EPI_ISL_1090963, EPI_ISL_1090964, EPI_ISL_1090965, EPI_ISL_1090981, EPI_ISL_1090982, EPI_ISL_1090983, EPI_ISL_1090984, EPI_ISL_1090985, EPI_ISL_1090986, EPI_ISL_1090987, EPI_ISL_1090988, EPI_ISL_1090990, EPI_ISL_1090991, EPI_ISL_1090992, EPI_ISL_1090993, EPI_ISL_1090994, EPI_ISL_1090995, EPI_ISL_1090997, EPI_ISL_1090998, EPI_ISL_1091009, EPI_ISL_1091002, EPI_ISL_1091003, EPI_ISL_1091004, EPI_ISL_1091005, EPI_ISL_1091011, EPI_ISL_1091012, EPI_ISL_1091037, EPI_ISL_1091040, EPI_ISL_1091073, EPI_ISL_1091078                                                    | see above                                   | Quest Diagnostics Incorporated                                                                     | Respiratory Viruses Branch, Division of Viral Diseases, Centers for Disease Control and Prevention                                                                                                                                                                                                                                                                                                                                                                                                                                                                                             |
| EPI_ISL_1093593, EPI_ISL_1093594, EPI_ISL_1093597, EPI_ISL_1093598, EPI_ISL_1093599, EPI_ISL_1093600, EPI_ISL_1093601                                                                                                                                                                                                                                                                                                                                                                                                                                                                                                                                                                                                                                                                                                                                                                                                                                                                                                                                                                                                                                                                                                                                                                                                                                                                                                                                                                               | Alameda County Public Health Department     | Alameda County Public Health Department                                                            | Kristna Hsieh, Maria Elma, Kevin Libuit                                                                                                                                                                                                                                                                                                                                                                                                                                                                                                                                                        |
| EPI_ISL_1097724, EPI_ISL_1097727, EPI_ISL_1097728, EPI_ISL_1097729, EPI_ISL_1097730, EPI_ISL_1097731, EPI_ISL_1097733, EPI_ISL_1097734, EPI_ISL_1097735, EPI_ISL_1097736, EPI_ISL_1097737, EPI_ISL_1097741                                                                                                                                                                                                                                                                                                                                                                                                                                                                                                                                                                                                                                                                                                                                                                                                                                                                                                                                                                                                                                                                                                                                                                                                                                                                                          | see above                                   | Los Angeles County PHL                                                                             | P. Hemarajata et al.                                                                                                                                                                                                                                                                                                                                                                                                                                                                                                                                                                           |
| EPI_ISL_1097742                                                                                                                                                                                                                                                                                                                                                                                                                                                                                                                                                                                                                                                                                                                                                                                                                                                                                                                                                                                                                                                                                                                                                                                                                                                                                                                                                                                                                                                                                     | UCLA Clinical Micro Lab                     | Los Angeles County PHL                                                                             | P. Hemarajata et al.                                                                                                                                                                                                                                                                                                                                                                                                                                                                                                                                                                           |

|                                                                                                                                                                                                                                                                                                                                                                                                                                                                                                                                                                                                                                                                                                                                                                                                                                                                                                                                                                                                                                                                                                                                                                                                                                                                                                                                                                                                                                                                                                                                                                                                                                                                                                                                                                                                                                                                                                                                                                                                                                                                                                                                                                                                                                                                                                                                                                                                                                                                                                                                                                                                                                                                                                                                                                                                                                                                                                                                                                                                                                                                                                                                                                                                                                                                                                                                                                                                                                                                                                                                                                                                                                                                                                                                                                                                                                                                                                                                                                                                                                                                                                                                                                                                                                                                                                                                                                                                                                                                                                                                                                                                                                                                                                                                                                                               |                                                                                                    |                                                                                                    |                                                                                                                                                                                                                                                                                                                                                                                                                                                                                                                                                                                                                                                                                                                                                                                                                                                                                                        |
|-----------------------------------------------------------------------------------------------------------------------------------------------------------------------------------------------------------------------------------------------------------------------------------------------------------------------------------------------------------------------------------------------------------------------------------------------------------------------------------------------------------------------------------------------------------------------------------------------------------------------------------------------------------------------------------------------------------------------------------------------------------------------------------------------------------------------------------------------------------------------------------------------------------------------------------------------------------------------------------------------------------------------------------------------------------------------------------------------------------------------------------------------------------------------------------------------------------------------------------------------------------------------------------------------------------------------------------------------------------------------------------------------------------------------------------------------------------------------------------------------------------------------------------------------------------------------------------------------------------------------------------------------------------------------------------------------------------------------------------------------------------------------------------------------------------------------------------------------------------------------------------------------------------------------------------------------------------------------------------------------------------------------------------------------------------------------------------------------------------------------------------------------------------------------------------------------------------------------------------------------------------------------------------------------------------------------------------------------------------------------------------------------------------------------------------------------------------------------------------------------------------------------------------------------------------------------------------------------------------------------------------------------------------------------------------------------------------------------------------------------------------------------------------------------------------------------------------------------------------------------------------------------------------------------------------------------------------------------------------------------------------------------------------------------------------------------------------------------------------------------------------------------------------------------------------------------------------------------------------------------------------------------------------------------------------------------------------------------------------------------------------------------------------------------------------------------------------------------------------------------------------------------------------------------------------------------------------------------------------------------------------------------------------------------------------------------------------------------------------------------------------------------------------------------------------------------------------------------------------------------------------------------------------------------------------------------------------------------------------------------------------------------------------------------------------------------------------------------------------------------------------------------------------------------------------------------------------------------------------------------------------------------------------------------------------------------------------------------------------------------------------------------------------------------------------------------------------------------------------------------------------------------------------------------------------------------------------------------------------------------------------------------------------------------------------------------------------------------------------------------------------------------------------------------|----------------------------------------------------------------------------------------------------|----------------------------------------------------------------------------------------------------|--------------------------------------------------------------------------------------------------------------------------------------------------------------------------------------------------------------------------------------------------------------------------------------------------------------------------------------------------------------------------------------------------------------------------------------------------------------------------------------------------------------------------------------------------------------------------------------------------------------------------------------------------------------------------------------------------------------------------------------------------------------------------------------------------------------------------------------------------------------------------------------------------------|
| EPI_ISL_1097743                                                                                                                                                                                                                                                                                                                                                                                                                                                                                                                                                                                                                                                                                                                                                                                                                                                                                                                                                                                                                                                                                                                                                                                                                                                                                                                                                                                                                                                                                                                                                                                                                                                                                                                                                                                                                                                                                                                                                                                                                                                                                                                                                                                                                                                                                                                                                                                                                                                                                                                                                                                                                                                                                                                                                                                                                                                                                                                                                                                                                                                                                                                                                                                                                                                                                                                                                                                                                                                                                                                                                                                                                                                                                                                                                                                                                                                                                                                                                                                                                                                                                                                                                                                                                                                                                                                                                                                                                                                                                                                                                                                                                                                                                                                                                                               | Los Angeles County PHL                                                                             | Los Angeles County PHL                                                                             | P. Hemarajata et al.                                                                                                                                                                                                                                                                                                                                                                                                                                                                                                                                                                                                                                                                                                                                                                                                                                                                                   |
| EPI_ISL_1098609, EPI_ISL_1098610, EPI_ISL_1098611, EPI_ISL_1098612, EPI_ISL_1098613, EPI_ISL_1098614, EPI_ISL_1098616, EPI_ISL_1098618, EPI_ISL_1098619, EPI_ISL_1098620, EPI_ISL_1098622, EPI_ISL_1098623, EPI_ISL_1098624, EPI_ISL_1098625, EPI_ISL_1098626, EPI_ISL_1098627, EPI_ISL_1098630, EPI_ISL_1098631                                                                                                                                                                                                                                                                                                                                                                                                                                                                                                                                                                                                                                                                                                                                                                                                                                                                                                                                                                                                                                                                                                                                                                                                                                                                                                                                                                                                                                                                                                                                                                                                                                                                                                                                                                                                                                                                                                                                                                                                                                                                                                                                                                                                                                                                                                                                                                                                                                                                                                                                                                                                                                                                                                                                                                                                                                                                                                                                                                                                                                                                                                                                                                                                                                                                                                                                                                                                                                                                                                                                                                                                                                                                                                                                                                                                                                                                                                                                                                                                                                                                                                                                                                                                                                                                                                                                                                                                                                                                              | UCLA Clinical Micro Lab                                                                            | Los Angeles County PHL                                                                             | P. Hemarajata et al.                                                                                                                                                                                                                                                                                                                                                                                                                                                                                                                                                                                                                                                                                                                                                                                                                                                                                   |
| see above                                                                                                                                                                                                                                                                                                                                                                                                                                                                                                                                                                                                                                                                                                                                                                                                                                                                                                                                                                                                                                                                                                                                                                                                                                                                                                                                                                                                                                                                                                                                                                                                                                                                                                                                                                                                                                                                                                                                                                                                                                                                                                                                                                                                                                                                                                                                                                                                                                                                                                                                                                                                                                                                                                                                                                                                                                                                                                                                                                                                                                                                                                                                                                                                                                                                                                                                                                                                                                                                                                                                                                                                                                                                                                                                                                                                                                                                                                                                                                                                                                                                                                                                                                                                                                                                                                                                                                                                                                                                                                                                                                                                                                                                                                                                                                                     | Los Angeles County PHL                                                                             | Los Angeles County PHL                                                                             | P. Hemarajata et al.                                                                                                                                                                                                                                                                                                                                                                                                                                                                                                                                                                                                                                                                                                                                                                                                                                                                                   |
| EPI_ISL_1098632, EPI_ISL_1098633, EPI_ISL_1098634, EPI_ISL_1098635, EPI_ISL_1098639, EPI_ISL_1098640                                                                                                                                                                                                                                                                                                                                                                                                                                                                                                                                                                                                                                                                                                                                                                                                                                                                                                                                                                                                                                                                                                                                                                                                                                                                                                                                                                                                                                                                                                                                                                                                                                                                                                                                                                                                                                                                                                                                                                                                                                                                                                                                                                                                                                                                                                                                                                                                                                                                                                                                                                                                                                                                                                                                                                                                                                                                                                                                                                                                                                                                                                                                                                                                                                                                                                                                                                                                                                                                                                                                                                                                                                                                                                                                                                                                                                                                                                                                                                                                                                                                                                                                                                                                                                                                                                                                                                                                                                                                                                                                                                                                                                                                                          | Helix/Illumina                                                                                     | Respiratory Viruses Branch, Division of Viral Diseases, Centers for Disease Control and Prevention | Peter W. Cook, Dakota Howard, Dhvani Batra, Ben L. Rambo-Martin, Eileen de Feo, Jan Antico, Christine Tran, Matthew Tolentino, Shannon Wickline, Kim Gietzen, Brad Sickler, Jingtao Liu, Eric Allen, Phil Febbo, Summer Galloway, Nicole L. Washington, Simon White, Geraint Levan, Kelly Schiabor Barrett, Elizabeth Cirulli, Alexandre Bolze, Ary Ascencio, Charlotte Rivera-Garcia, Ryan Cho, Jason Nguyen, Sherry Wang, Jimmy Ramirez, Tyler Cassens, Efrén Sandoval, Magnus Isaksson, William Lee, David Becker, Marc Laurent, James Lu, Clinton R. Paden, Suxiang Tong, Duncan MacCannell                                                                                                                                                                                                                                                                                                        |
| EPI_ISL_1110663                                                                                                                                                                                                                                                                                                                                                                                                                                                                                                                                                                                                                                                                                                                                                                                                                                                                                                                                                                                                                                                                                                                                                                                                                                                                                                                                                                                                                                                                                                                                                                                                                                                                                                                                                                                                                                                                                                                                                                                                                                                                                                                                                                                                                                                                                                                                                                                                                                                                                                                                                                                                                                                                                                                                                                                                                                                                                                                                                                                                                                                                                                                                                                                                                                                                                                                                                                                                                                                                                                                                                                                                                                                                                                                                                                                                                                                                                                                                                                                                                                                                                                                                                                                                                                                                                                                                                                                                                                                                                                                                                                                                                                                                                                                                                                               | Quest Diagnostics Incorporated                                                                     | Respiratory Viruses Branch, Division of Viral Diseases, Centers for Disease Control and Prevention | Peter W. Cook, Dakota Howard, Dhvani Batra, Ben L. Rambo-Martin, S. H. Rosenthal, A. Gerasimova, R. M. Kagan, B. Anderson, M. Hua, Y. Liu, L.E. Bernstein, K.E. Livingston, A. Perez, I. A. Shlyakhter, R. V. Rolando, R. Owen, P. Tanpaiboon, F. Lacbawan, Clinton R. Paden, Suxiang Tong, Duncan MacCannell                                                                                                                                                                                                                                                                                                                                                                                                                                                                                                                                                                                          |
| EPI_ISL_1113902, EPI_ISL_1114075, EPI_ISL_1114137                                                                                                                                                                                                                                                                                                                                                                                                                                                                                                                                                                                                                                                                                                                                                                                                                                                                                                                                                                                                                                                                                                                                                                                                                                                                                                                                                                                                                                                                                                                                                                                                                                                                                                                                                                                                                                                                                                                                                                                                                                                                                                                                                                                                                                                                                                                                                                                                                                                                                                                                                                                                                                                                                                                                                                                                                                                                                                                                                                                                                                                                                                                                                                                                                                                                                                                                                                                                                                                                                                                                                                                                                                                                                                                                                                                                                                                                                                                                                                                                                                                                                                                                                                                                                                                                                                                                                                                                                                                                                                                                                                                                                                                                                                                                             | Altitus Institute for Biomedical Sciences                                                          | Seattle Flu Study                                                                                  | Deborah A. Nickerson, Chris D. Frazier, Jover Lee, Benjamin Pelle, Erica Ryke, Matthew Richardson, Amanda Adler, Elisabeth Brandstetter, Peter D. Han, Kairsten Fay, Misja Ilcisin, Kirsten Lacombe, Thomas R. Sibley, Melissa Truong, Caitlin R. Wolf, Ryan Alexander, Daniel Bates, Rebecca Bruders, Stephanie DeBaun, Clem Green, Muhammad Halimun, Jessica Halow, Kneshay Harper, Matt Hartman, Andrew Meuser, Ale Nguyen, Trung Nguyen, Sofia Olsson, Sadie Patraw, Hannah Petersen, Tobias Ragoczy, Joshua Richards, Jacob Roderick, John Stamatoyannopoulos, Julia Wald, Olivia Waltner, Michael Boeckh, Janet A. Englund, Michael Famulare, Barry R. Lutz, Mark J. Rieder, Lea M. Starita, Matthew Thompson, Helen Y. Chu, Jay Shendure, Trevor Bedford                                                                                                                                        |
| EPI_ISL_1114336                                                                                                                                                                                                                                                                                                                                                                                                                                                                                                                                                                                                                                                                                                                                                                                                                                                                                                                                                                                                                                                                                                                                                                                                                                                                                                                                                                                                                                                                                                                                                                                                                                                                                                                                                                                                                                                                                                                                                                                                                                                                                                                                                                                                                                                                                                                                                                                                                                                                                                                                                                                                                                                                                                                                                                                                                                                                                                                                                                                                                                                                                                                                                                                                                                                                                                                                                                                                                                                                                                                                                                                                                                                                                                                                                                                                                                                                                                                                                                                                                                                                                                                                                                                                                                                                                                                                                                                                                                                                                                                                                                                                                                                                                                                                                                               | Helix/Illumina                                                                                     | Respiratory Viruses Branch, Division of Viral Diseases, Centers for Disease Control and Prevention | Peter W. Cook, Dakota Howard, Dhvani Batra, Ben L. Rambo-Martin, Eileen de Feo, Jan Antico, Christine Tran, Matthew Tolentino, Shannon Wickline, Kim Gietzen, Brad Sickler, Jingtao Liu, Eric Allen, Phil Febbo, Summer Galloway, Nicole L. Washington, Simon White, Geraint Levan, Kelly Schiabor Barrett, Elizabeth Cirulli, Alexandre Bolze, Ary Ascencio, Charlotte Rivera-Garcia, Ryan Cho, Jason Nguyen, Sherry Wang, Jimmy Ramirez, Tyler Cassens, Efrén Sandoval, Magnus Isaksson, William Lee, David Becker, Marc Laurent, James Lu, Clinton R. Paden, Suxiang Tong, Duncan MacCannell                                                                                                                                                                                                                                                                                                        |
| EPI_ISL_1133842, EPI_ISL_1133866, EPI_ISL_1133894, EPI_ISL_1133895, EPI_ISL_1133896, EPI_ISL_1133901, EPI_ISL_1133937, EPI_ISL_1133965, EPI_ISL_1133984, EPI_ISL_1134005, EPI_ISL_1134041, EPI_ISL_1134056, EPI_ISL_1134058, EPI_ISL_1134063, EPI_ISL_1134065, EPI_ISL_1134070, EPI_ISL_1134073, EPI_ISL_1134085, EPI_ISL_1134099, EPI_ISL_1134109, EPI_ISL_1134114, EPI_ISL_1134127, EPI_ISL_1134145, EPI_ISL_1134146, EPI_ISL_1134147, EPI_ISL_1134148, EPI_ISL_1134154, EPI_ISL_1134157, EPI_ISL_1134180, EPI_ISL_1134182, EPI_ISL_1134279, EPI_ISL_1134280, EPI_ISL_1134283, EPI_ISL_1134291, EPI_ISL_1134292, EPI_ISL_1134299, EPI_ISL_1134305, EPI_ISL_1134306, EPI_ISL_1134307, EPI_ISL_1134315, EPI_ISL_1134332, EPI_ISL_1134338, EPI_ISL_1134351, EPI_ISL_1134369, EPI_ISL_1134395, EPI_ISL_1134404, EPI_ISL_1134407, EPI_ISL_1134412, EPI_ISL_1134432, EPI_ISL_1134447, EPI_ISL_1134504, EPI_ISL_1134531, EPI_ISL_1134539, EPI_ISL_1134557, EPI_ISL_1134563, EPI_ISL_1134568, EPI_ISL_1134569, EPI_ISL_1134570, EPI_ISL_1134574, EPI_ISL_1134580, EPI_ISL_1134581, EPI_ISL_1134648, EPI_ISL_1134654, EPI_ISL_1134673, EPI_ISL_1134714, EPI_ISL_1134751, EPI_ISL_1134818                                                                                                                                                                                                                                                                                                                                                                                                                                                                                                                                                                                                                                                                                                                                                                                                                                                                                                                                                                                                                                                                                                                                                                                                                                                                                                                                                                                                                                                                                                                                                                                                                                                                                                                                                                                                                                                                                                                                                                                                                                                                                                                                                                                                                                                                                                                                                                                                                                                                                                                                                                                                                                                                                                                                                                                                                                                                                                                                                                                                                                                                                                                                                                                                                                                                                                                                                                                                                                                                                                                                                                                                             | Santa Clara County Public Health Laboratory                                                        | Santa Clara County Public Health Laboratory                                                        | Santa Clara County Public Health Department                                                                                                                                                                                                                                                                                                                                                                                                                                                                                                                                                                                                                                                                                                                                                                                                                                                            |
| see above                                                                                                                                                                                                                                                                                                                                                                                                                                                                                                                                                                                                                                                                                                                                                                                                                                                                                                                                                                                                                                                                                                                                                                                                                                                                                                                                                                                                                                                                                                                                                                                                                                                                                                                                                                                                                                                                                                                                                                                                                                                                                                                                                                                                                                                                                                                                                                                                                                                                                                                                                                                                                                                                                                                                                                                                                                                                                                                                                                                                                                                                                                                                                                                                                                                                                                                                                                                                                                                                                                                                                                                                                                                                                                                                                                                                                                                                                                                                                                                                                                                                                                                                                                                                                                                                                                                                                                                                                                                                                                                                                                                                                                                                                                                                                                                     | Respiratory Viruses Branch, Division of Viral Diseases, Centers for Disease Control and Prevention | Santa Clara County Public Health Laboratory                                                        | Peter W. Cook, Dakota Howard, Dhvani Batra, Ben L. Rambo-Martin, Eileen de Feo, Jan Antico, Christine Tran, Matthew Tolentino, Shannon Wickline, Kim Gietzen, Brad Sickler, Jingtao Liu, Eric Allen, Phil Febbo, Summer Galloway, Nicole L. Washington, Simon White, Geraint Levan, Kelly Schiabor Barrett, Elizabeth Cirulli, Alexandre Bolze, Ary Ascencio, Charlotte Rivera-Garcia, Ryan Cho, Jason Nguyen, Sherry Wang, Jimmy Ramirez, Tyler Cassens, Efrén Sandoval, Magnus Isaksson, William Lee, David Becker, Marc Laurent, James Lu, Clinton R. Paden, Suxiang Tong, Duncan MacCannell                                                                                                                                                                                                                                                                                                        |
| EPI_ISL_1139180, EPI_ISL_1139223, EPI_ISL_1139297, EPI_ISL_1139322, EPI_ISL_1139381, EPI_ISL_1139383, EPI_ISL_1139384, EPI_ISL_1139387, EPI_ISL_1139388, EPI_ISL_1139389, EPI_ISL_1139390, EPI_ISL_1139391, EPI_ISL_1139392, EPI_ISL_1139393, EPI_ISL_1139394, EPI_ISL_1139395, EPI_ISL_1139396, EPI_ISL_1139397, EPI_ISL_1139398, EPI_ISL_1139399, EPI_ISL_1139400, EPI_ISL_1139401, EPI_ISL_1139402, EPI_ISL_1139403, EPI_ISL_1139404, EPI_ISL_1139405, EPI_ISL_1139406, EPI_ISL_1139407, EPI_ISL_1139408, EPI_ISL_1139409, EPI_ISL_1139410, EPI_ISL_1139411, EPI_ISL_1139412, EPI_ISL_1139413, EPI_ISL_1139414, EPI_ISL_1139415, EPI_ISL_1139416, EPI_ISL_1139417, EPI_ISL_1139418, EPI_ISL_1139419, EPI_ISL_1139420, EPI_ISL_1139421, EPI_ISL_1139422, EPI_ISL_1139423, EPI_ISL_1139424, EPI_ISL_1139425, EPI_ISL_1139426, EPI_ISL_1139427, EPI_ISL_1139428, EPI_ISL_1139429, EPI_ISL_1139430, EPI_ISL_1139431, EPI_ISL_1139432, EPI_ISL_1139433, EPI_ISL_1139434, EPI_ISL_1139435, EPI_ISL_1139436, EPI_ISL_1139437, EPI_ISL_1139438, EPI_ISL_1139439, EPI_ISL_1139440, EPI_ISL_1139441, EPI_ISL_1139442, EPI_ISL_1139443, EPI_ISL_1139444, EPI_ISL_1139445, EPI_ISL_1139446, EPI_ISL_1139447, EPI_ISL_1139448, EPI_ISL_1139449, EPI_ISL_1139450, EPI_ISL_1139451, EPI_ISL_1139452, EPI_ISL_1139453, EPI_ISL_1139454, EPI_ISL_1139455, EPI_ISL_1139456, EPI_ISL_1139457, EPI_ISL_1139458, EPI_ISL_1139459, EPI_ISL_1139460, EPI_ISL_1139461, EPI_ISL_1139462, EPI_ISL_1139463, EPI_ISL_1139464, EPI_ISL_1139465, EPI_ISL_1139466, EPI_ISL_1139467, EPI_ISL_1139468, EPI_ISL_1139469, EPI_ISL_1139470, EPI_ISL_1139471, EPI_ISL_1139472, EPI_ISL_1139473, EPI_ISL_1139474, EPI_ISL_1139475, EPI_ISL_1139476, EPI_ISL_1139477, EPI_ISL_1139478, EPI_ISL_1139479, EPI_ISL_1139480, EPI_ISL_1139481, EPI_ISL_1139482, EPI_ISL_1139483, EPI_ISL_1139484, EPI_ISL_1139485, EPI_ISL_1139486, EPI_ISL_1139487, EPI_ISL_1139488, EPI_ISL_1139489, EPI_ISL_1139490, EPI_ISL_1139491, EPI_ISL_1139492, EPI_ISL_1139493, EPI_ISL_1139494, EPI_ISL_1139495, EPI_ISL_1139496, EPI_ISL_1139497, EPI_ISL_1139498, EPI_ISL_1139499, EPI_ISL_1139500, EPI_ISL_1139501, EPI_ISL_1139502, EPI_ISL_1139503, EPI_ISL_1139504, EPI_ISL_1139505, EPI_ISL_1139506, EPI_ISL_1139507, EPI_ISL_1139508, EPI_ISL_1139509, EPI_ISL_1139510, EPI_ISL_1139511, EPI_ISL_1139512, EPI_ISL_1139513, EPI_ISL_1139514, EPI_ISL_1139515, EPI_ISL_1139516, EPI_ISL_1139517, EPI_ISL_1139518, EPI_ISL_1139519, EPI_ISL_1139520, EPI_ISL_1139521, EPI_ISL_1139522, EPI_ISL_1139523, EPI_ISL_1139524, EPI_ISL_1139525, EPI_ISL_1139526, EPI_ISL_1139527, EPI_ISL_1139528, EPI_ISL_1139529, EPI_ISL_1139530, EPI_ISL_1139531, EPI_ISL_1139532, EPI_ISL_1139533, EPI_ISL_1139534, EPI_ISL_1139535, EPI_ISL_1139536, EPI_ISL_1139537, EPI_ISL_1139538, EPI_ISL_1139539, EPI_ISL_1139540, EPI_ISL_1139541, EPI_ISL_1139542, EPI_ISL_1139543, EPI_ISL_1139544, EPI_ISL_1139545, EPI_ISL_1139546, EPI_ISL_1139547, EPI_ISL_1139548, EPI_ISL_1139549, EPI_ISL_1139550, EPI_ISL_1139551, EPI_ISL_1139552, EPI_ISL_1139553, EPI_ISL_1139554, EPI_ISL_1139555, EPI_ISL_1139556, EPI_ISL_1139557, EPI_ISL_1139558, EPI_ISL_1139559, EPI_ISL_1139560, EPI_ISL_1139561, EPI_ISL_1139562, EPI_ISL_1139563, EPI_ISL_1139564, EPI_ISL_1139565, EPI_ISL_1139566, EPI_ISL_1139567, EPI_ISL_1139568, EPI_ISL_1139569, EPI_ISL_1139570, EPI_ISL_1139571, EPI_ISL_1139572, EPI_ISL_1139573, EPI_ISL_1139574, EPI_ISL_1139575, EPI_ISL_1139576, EPI_ISL_1139577, EPI_ISL_1139578, EPI_ISL_1139579, EPI_ISL_1139580, EPI_ISL_1139581, EPI_ISL_1139582, EPI_ISL_1139583, EPI_ISL_1139584, EPI_ISL_1139585, EPI_ISL_1139586, EPI_ISL_1139587, EPI_ISL_1139588, EPI_ISL_1139589, EPI_ISL_1139590, EPI_ISL_1139591, EPI_ISL_1139592, EPI_ISL_1139593, EPI_ISL_1139594, EPI_ISL_1139595, EPI_ISL_1139596, EPI_ISL_1139597, EPI_ISL_1139598, EPI_ISL_1139599, EPI_ISL_1139600, EPI_ISL_1139601, EPI_ISL_1139602, EPI_ISL_1139603, EPI_ISL_1139604, EPI_ISL_1139605, EPI_ISL_1139606, EPI_ISL_1139607, EPI_ISL_1139608, EPI_ISL_1139609, EPI_ISL_1139610, EPI_ISL_1139611, EPI_ISL_1139612, EPI_ISL_1139613, EPI_ISL_1139614, EPI_ISL_1139615, EPI_ISL_1139616, EPI_ISL_1139617, EPI_ISL_1139618, EPI_ISL_1139619, EPI_ISL_1139620, EPI_ISL_1139621, EPI_ISL_1139622, EPI_ISL_1139623, EPI_ISL_1139624, EPI_ISL_1139625, EPI_ISL_1139626, EPI_ISL_1139627, EPI_ISL_1139628, EPI_ISL_1139629, EPI_ISL_1139630, EPI_ISL_1139631, EPI_ISL_1139632, EPI_ISL_1139633, EPI_ISL_1139634, EPI_ISL_1139635, EPI_ISL_1139636, EPI_ISL_1139637, EPI_ISL_1139638, EPI_ISL_1139639, EPI_ISL_1139640, EPI_ISL_1139641, EPI_ISL_1139642, EPI_ISL_1139643, EPI_ISL_1139644, EPI_ISL_1139645, EPI_ISL_1139646, EPI_ISL_1139647, EPI_ISL_1139648, EPI_ISL_1139649, EPI_ISL_1139650 | Quest Diagnostics Incorporated                                                                     | Respiratory Viruses Branch, Division of Viral Diseases, Centers for Disease Control and Prevention | Peter W. Cook, Dakota Howard, Dhvani Batra, Ben L. Rambo-Martin, S. H. Rosenthal, A. Gerasimova, R. M. Kagan, B. Anderson, M. Hua, Y. Liu, L.E. Bernstein, K.E. Livingston, A. Perez, I. A. Shlyakhter, R. V. Rolando, R. Owen, P. Tanpaiboon, F. Lacbawan, Clinton R. Paden, Suxiang Tong, Duncan MacCannell                                                                                                                                                                                                                                                                                                                                                                                                                                                                                                                                                                                          |
| see above                                                                                                                                                                                                                                                                                                                                                                                                                                                                                                                                                                                                                                                                                                                                                                                                                                                                                                                                                                                                                                                                                                                                                                                                                                                                                                                                                                                                                                                                                                                                                                                                                                                                                                                                                                                                                                                                                                                                                                                                                                                                                                                                                                                                                                                                                                                                                                                                                                                                                                                                                                                                                                                                                                                                                                                                                                                                                                                                                                                                                                                                                                                                                                                                                                                                                                                                                                                                                                                                                                                                                                                                                                                                                                                                                                                                                                                                                                                                                                                                                                                                                                                                                                                                                                                                                                                                                                                                                                                                                                                                                                                                                                                                                                                                                                                     | Quest Diagnostics Incorporated                                                                     | Centers for Disease Control and Prevention Division of Viral Diseases, Pathogen Discovery          | Peter W. Cook, Dakota Howard, Dhvani Batra, Ben L. Rambo-Martin, S. H. Rosenthal, A. Gerasimova, R. M. Kagan, B. Anderson, M. Hua, Y. Liu, L.E. Bernstein, K.E. Livingston, A. Perez, I. A. Shlyakhter, R. V. Rolando, R. Owen, P. Tanpaiboon, F. Lacbawan, Clinton R. Paden, Suxiang Tong, Duncan MacCannell                                                                                                                                                                                                                                                                                                                                                                                                                                                                                                                                                                                          |
| EPI_ISL_1159250, EPI_ISL_1159262, EPI_ISL_1159269, EPI_ISL_1159274, EPI_ISL_1159275, EPI_ISL_1159287, EPI_ISL_1159288, EPI_ISL_1159294, EPI_ISL_1159295, EPI_ISL_1159324                                                                                                                                                                                                                                                                                                                                                                                                                                                                                                                                                                                                                                                                                                                                                                                                                                                                                                                                                                                                                                                                                                                                                                                                                                                                                                                                                                                                                                                                                                                                                                                                                                                                                                                                                                                                                                                                                                                                                                                                                                                                                                                                                                                                                                                                                                                                                                                                                                                                                                                                                                                                                                                                                                                                                                                                                                                                                                                                                                                                                                                                                                                                                                                                                                                                                                                                                                                                                                                                                                                                                                                                                                                                                                                                                                                                                                                                                                                                                                                                                                                                                                                                                                                                                                                                                                                                                                                                                                                                                                                                                                                                                      | Quest Diagnostics Incorporated                                                                     | Respiratory Viruses Branch, Division of Viral Diseases, Centers for Disease Control and Prevention | Peter W. Cook, Dakota Howard, Dhvani Batra, Ben L. Rambo-Martin, S. H. Rosenthal, A. Gerasimova, R. M. Kagan, B. Anderson, M. Hua, Y. Liu, L.E. Bernstein, K.E. Livingston, A. Perez, I. A. Shlyakhter, R. V. Rolando, R. Owen, P. Tanpaiboon, F. Lacbawan, Clinton R. Paden, Suxiang Tong, Duncan MacCannell                                                                                                                                                                                                                                                                                                                                                                                                                                                                                                                                                                                          |
| EPI_ISL_1159409, EPI_ISL_1159437, EPI_ISL_1159459, EPI_ISL_1159479, EPI_ISL_1159600, EPI_ISL_1159603, EPI_ISL_1159620, EPI_ISL_1159623, EPI_ISL_1159643, EPI_ISL_1159653, EPI_ISL_1159659, EPI_ISL_1159674                                                                                                                                                                                                                                                                                                                                                                                                                                                                                                                                                                                                                                                                                                                                                                                                                                                                                                                                                                                                                                                                                                                                                                                                                                                                                                                                                                                                                                                                                                                                                                                                                                                                                                                                                                                                                                                                                                                                                                                                                                                                                                                                                                                                                                                                                                                                                                                                                                                                                                                                                                                                                                                                                                                                                                                                                                                                                                                                                                                                                                                                                                                                                                                                                                                                                                                                                                                                                                                                                                                                                                                                                                                                                                                                                                                                                                                                                                                                                                                                                                                                                                                                                                                                                                                                                                                                                                                                                                                                                                                                                                                    | Quest Diagnostics Incorporated                                                                     | Respiratory Viruses Branch, Division of Viral Diseases, Centers for Disease Control and Prevention | Peter W. Cook, Dakota Howard, Dhvani Batra, Ben L. Rambo-Martin, S. H. Rosenthal, A. Gerasimova, R. M. Kagan, B. Anderson, M. Hua, Y. Liu, L.E. Bernstein, K.E. Livingston, A. Perez, I. A. Shlyakhter, R. V. Rolando, R. Owen, P. Tanpaiboon, F. Lacbawan, Clinton R. Paden, Suxiang Tong, Duncan MacCannell                                                                                                                                                                                                                                                                                                                                                                                                                                                                                                                                                                                          |
| see above                                                                                                                                                                                                                                                                                                                                                                                                                                                                                                                                                                                                                                                                                                                                                                                                                                                                                                                                                                                                                                                                                                                                                                                                                                                                                                                                                                                                                                                                                                                                                                                                                                                                                                                                                                                                                                                                                                                                                                                                                                                                                                                                                                                                                                                                                                                                                                                                                                                                                                                                                                                                                                                                                                                                                                                                                                                                                                                                                                                                                                                                                                                                                                                                                                                                                                                                                                                                                                                                                                                                                                                                                                                                                                                                                                                                                                                                                                                                                                                                                                                                                                                                                                                                                                                                                                                                                                                                                                                                                                                                                                                                                                                                                                                                                                                     | Laboratory Corporation of America                                                                  | Respiratory Viruses Branch, Division of Viral Diseases, Centers for Disease Control and Prevention | Peter W. Cook, Dakota Howard, Dhvani Batra, Ben L. Rambo-Martin, Mino Agarwal, Eyaad Almasri Debbie Boles, Ayla Burns, Nuthawin Charoensri, Oren Cohen, Susan Countryman, Mary Ann Cristobal, Bobbi Croy, Suzanne Dale, Hrushikesh Deshmukh, Amanda Douglas, Vincent Drouillon, Marcia Eisenberg, Howard Engler, Rama Ghatti, Prashant Gupta, Susan Hicks, Jake Humphrey, Lax Iyer, Manoj Jain, Mohan Kolli, Brian Krueger, Tim Kuphal, Stanley Letovsky, Michael Levandoski, Craig Lukasik, Jonathan Meltzer, Brian Norvell, Minda Nye, Scott Parker, Christos Petropoulos, John Pruitt, Steven Ragan, Scott Ryan, Mike Sapeta, Jana Schroth, Suresh Babu Selvaraju, Goran Stevovic, Amanda Suchanec, Andrea Throop, Lyndon Tilson, Thomas Urban, Joe Voshell, Kimberly Wagner, Jonathan Williams, Mary Williamson, Qian Zeng, Tricia Zwiefelhofer, Clinton R. Paden, Suxiang Tong, Duncan MacCannell |
| EPI_ISL_1169600                                                                                                                                                                                                                                                                                                                                                                                                                                                                                                                                                                                                                                                                                                                                                                                                                                                                                                                                                                                                                                                                                                                                                                                                                                                                                                                                                                                                                                                                                                                                                                                                                                                                                                                                                                                                                                                                                                                                                                                                                                                                                                                                                                                                                                                                                                                                                                                                                                                                                                                                                                                                                                                                                                                                                                                                                                                                                                                                                                                                                                                                                                                                                                                                                                                                                                                                                                                                                                                                                                                                                                                                                                                                                                                                                                                                                                                                                                                                                                                                                                                                                                                                                                                                                                                                                                                                                                                                                                                                                                                                                                                                                                                                                                                                                                               | Santa Clara County Public Health Laboratory                                                        | Santa Clara County Public Health Laboratory                                                        | Santa Clara County Public Health Department                                                                                                                                                                                                                                                                                                                                                                                                                                                                                                                                                                                                                                                                                                                                                                                                                                                            |
| EPI_ISL_1185387                                                                                                                                                                                                                                                                                                                                                                                                                                                                                                                                                                                                                                                                                                                                                                                                                                                                                                                                                                                                                                                                                                                                                                                                                                                                                                                                                                                                                                                                                                                                                                                                                                                                                                                                                                                                                                                                                                                                                                                                                                                                                                                                                                                                                                                                                                                                                                                                                                                                                                                                                                                                                                                                                                                                                                                                                                                                                                                                                                                                                                                                                                                                                                                                                                                                                                                                                                                                                                                                                                                                                                                                                                                                                                                                                                                                                                                                                                                                                                                                                                                                                                                                                                                                                                                                                                                                                                                                                                                                                                                                                                                                                                                                                                                                                                               | County of San Luis Obispo Public Health Laboratory                                                 | Chan-Zuckerberg Biohub                                                                             | CZB Cliahub Consortium                                                                                                                                                                                                                                                                                                                                                                                                                                                                                                                                                                                                                                                                                                                                                                                                                                                                                 |
| EPI_ISL_1185960, EPI_ISL_1185961, EPI_ISL_1185962, EPI_ISL_1185963, EPI_ISL_1185964, EPI_ISL_1185966, EPI_ISL_1185968, EPI_ISL_1185969, EPI_ISL_1185970, EPI_ISL_1185971, EPI_ISL_1185972, EPI_ISL_1185973, EPI_ISL_1185974, EPI_ISL_1185975, EPI_ISL_1185976, EPI_ISL_1185977, EPI_ISL_1185978, EPI_ISL_1185979, EPI_ISL_1185980, EPI_ISL_1185981, EPI_ISL_1185982, EPI_ISL_1185983, EPI_ISL_1185984, EPI_ISL_1185986, EPI_ISL_1185988, EPI_ISL_1185991, EPI_ISL_1185992, EPI_ISL_1185995, EPI_ISL_1185996, EPI_ISL_1185997, EPI_ISL_1185998, EPI_ISL_1185999, EPI_ISL_1186000, EPI_ISL_1186001, EPI_ISL_1186002, EPI_ISL_1186003, EPI_ISL_1186004, EPI_ISL_1186005, EPI_ISL_1186006, EPI_ISL_1186007, EPI_ISL_1186008, EPI_ISL_1186009, EPI_ISL_1186010, EPI_ISL_1186011, EPI_ISL_1186012, EPI_ISL_1186013, EPI_ISL_1186014, EPI_ISL_1186015, EPI_ISL_1186016, EPI_ISL_1186017, EPI_ISL_1186018, EPI_ISL_1186019, EPI_ISL_1186020, EPI_ISL_1186021, EPI_ISL_1186022                                                                                                                                                                                                                                                                                                                                                                                                                                                                                                                                                                                                                                                                                                                                                                                                                                                                                                                                                                                                                                                                                                                                                                                                                                                                                                                                                                                                                                                                                                                                                                                                                                                                                                                                                                                                                                                                                                                                                                                                                                                                                                                                                                                                                                                                                                                                                                                                                                                                                                                                                                                                                                                                                                                                                                                                                                                                                                                                                                                                                                                                                                                                                                                                                                                                                                                                                                                                                                                                                                                                                                                                                                                                                                                                                                                                                         | Quest Diagnostics Incorporated                                                                     | Centers for Disease Control and Prevention Division of Viral Diseases, Pathogen Discovery          | Peter W. Cook, Dakota Howard, Dhvani Batra, Ben L. Rambo-Martin, Mino Agarwal, Eyaad Almasri Debbie Boles, Ayla Burns, Nuthawin Charoensri, Oren Cohen, Susan Countryman, Mary Ann Cristobal, Bobbi Croy, Suzanne Dale, Hrushikesh Deshmukh, Amanda Douglas, Vincent Drouillon, Marcia Eisenberg, Howard Engler, Rama Ghatti, Prashant Gupta, Susan Hicks, Jake Humphrey, Lax Iyer, Manoj Jain, Mohan Kolli, Brian Krueger, Tim Kuphal, Stanley Letovsky, Michael Levandoski, Craig Lukasik, Jonathan Meltzer, Brian Norvell, Minda Nye, Scott Parker, Christos Petropoulos, John Pruitt, Steven Ragan, Scott Ryan, Mike Sapeta, Jana Schroth, Suresh Babu Selvaraju, Goran Stevovic, Amanda Suchanec, Andrea Throop, Lyndon Tilson, Thomas Urban, Joe Voshell, Kimberly Wagner, Jonathan Williams, Mary Williamson, Qian Zeng, Tricia Zwiefelhofer, Clinton R. Paden, Suxiang Tong, Duncan MacCannell |
| see above                                                                                                                                                                                                                                                                                                                                                                                                                                                                                                                                                                                                                                                                                                                                                                                                                                                                                                                                                                                                                                                                                                                                                                                                                                                                                                                                                                                                                                                                                                                                                                                                                                                                                                                                                                                                                                                                                                                                                                                                                                                                                                                                                                                                                                                                                                                                                                                                                                                                                                                                                                                                                                                                                                                                                                                                                                                                                                                                                                                                                                                                                                                                                                                                                                                                                                                                                                                                                                                                                                                                                                                                                                                                                                                                                                                                                                                                                                                                                                                                                                                                                                                                                                                                                                                                                                                                                                                                                                                                                                                                                                                                                                                                                                                                                                                     | San Diego County Public Health Laboratory                                                          | Andersen lab at Scripps Research                                                                   | SEARCH Alliance San Diego with Tracy Basler, Jovan Shephard, Brett Austin                                                                                                                                                                                                                                                                                                                                                                                                                                                                                                                                                                                                                                                                                                                                                                                                                              |
| EPI_ISL_1191113                                                                                                                                                                                                                                                                                                                                                                                                                                                                                                                                                                                                                                                                                                                                                                                                                                                                                                                                                                                                                                                                                                                                                                                                                                                                                                                                                                                                                                                                                                                                                                                                                                                                                                                                                                                                                                                                                                                                                                                                                                                                                                                                                                                                                                                                                                                                                                                                                                                                                                                                                                                                                                                                                                                                                                                                                                                                                                                                                                                                                                                                                                                                                                                                                                                                                                                                                                                                                                                                                                                                                                                                                                                                                                                                                                                                                                                                                                                                                                                                                                                                                                                                                                                                                                                                                                                                                                                                                                                                                                                                                                                                                                                                                                                                                                               | UCLA Clinical Micro Lab                                                                            | Los Angeles County PHL                                                                             | P. Hemarajata et al.                                                                                                                                                                                                                                                                                                                                                                                                                                                                                                                                                                                                                                                                                                                                                                                                                                                                                   |
| EPI_ISL_1192365                                                                                                                                                                                                                                                                                                                                                                                                                                                                                                                                                                                                                                                                                                                                                                                                                                                                                                                                                                                                                                                                                                                                                                                                                                                                                                                                                                                                                                                                                                                                                                                                                                                                                                                                                                                                                                                                                                                                                                                                                                                                                                                                                                                                                                                                                                                                                                                                                                                                                                                                                                                                                                                                                                                                                                                                                                                                                                                                                                                                                                                                                                                                                                                                                                                                                                                                                                                                                                                                                                                                                                                                                                                                                                                                                                                                                                                                                                                                                                                                                                                                                                                                                                                                                                                                                                                                                                                                                                                                                                                                                                                                                                                                                                                                                                               | Huntington Memorial Hospital                                                                       | Los Angeles County PHL                                                                             | P. Hemarajata et al.                                                                                                                                                                                                                                                                                                                                                                                                                                                                                                                                                                                                                                                                                                                                                                                                                                                                                   |
| EPI_ISL_1193289                                                                                                                                                                                                                                                                                                                                                                                                                                                                                                                                                                                                                                                                                                                                                                                                                                                                                                                                                                                                                                                                                                                                                                                                                                                                                                                                                                                                                                                                                                                                                                                                                                                                                                                                                                                                                                                                                                                                                                                                                                                                                                                                                                                                                                                                                                                                                                                                                                                                                                                                                                                                                                                                                                                                                                                                                                                                                                                                                                                                                                                                                                                                                                                                                                                                                                                                                                                                                                                                                                                                                                                                                                                                                                                                                                                                                                                                                                                                                                                                                                                                                                                                                                                                                                                                                                                                                                                                                                                                                                                                                                                                                                                                                                                                                                               | Laboratory Corporation of America                                                                  | Centers for Disease Control and Prevention Division of Viral Diseases, Pathogen Discovery          | Peter W. Cook, Dakota Howard, Dhvani Batra, Ben L. Rambo-Martin, Mino Agarwal, Eyaad Almasri Debbie Boles, Ayla Burns, Nuthawin Charoensri, Oren Cohen, Susan Countryman, Mary Ann Cristobal, Bobbi Croy, Suzanne Dale, Hrushikesh Deshmukh, Amanda Douglas, Vincent Drouillon, Marcia Eisenberg, Howard Engler, Rama Ghatti, Prashant Gupta, Susan Hicks, Jake Humphrey, Lax Iyer, Manoj Jain, Mohan Kolli, Brian Krueger, Tim Kuphal,                                                                                                                                                                                                                                                                                                                                                                                                                                                                |

Stanley Letovsky, Michael Levandoski, Craig Lukasik, Jonathan Meltzer, Brian Norvell, Mindy Nye, Scott Parker, Christos Petropoulos, John Pruitt, Steven Ragan, Scott Ryan, Mike Sapeta, Jana Schroth, Suresh Babu Selvaraju, Goran Stevovic, Amanda Suchanek, Andrea Throop, Lyndon Tilson, Thomas Urban, Joe Voshell, Kimberly Wagner, Jonathan Williams, Mary Williamson, Qian Zeng, Tricia Zwiefelhofer, Clinton R. Paden, Suxiang Tong, Duncan MacCannell

EPI\_ISL\_1193374, EPI\_ISL\_1193379, EPI\_ISL\_1193381, EPI\_ISL\_1193382, EPI\_ISL\_1193383, EPI\_ISL\_1193386, EPI\_ISL\_1193388, EPI\_ISL\_1193390, EPI\_ISL\_1193392, EPI\_ISL\_1193394, EPI\_ISL\_1193395, EPI\_ISL\_1193405, EPI\_ISL\_1193411, EPI\_ISL\_1193414, EPI\_ISL\_1193415, EPI\_ISL\_1193416, EPI\_ISL\_1193417, EPI\_ISL\_1193421, EPI\_ISL\_1193422, EPI\_ISL\_1193423, EPI\_ISL\_1193426, EPI\_ISL\_1193430, EPI\_ISL\_1193431, EPI\_ISL\_1193433, EPI\_ISL\_1193434, EPI\_ISL\_1193435, EPI\_ISL\_1193436, EPI\_ISL\_1193437, EPI\_ISL\_1193438, EPI\_ISL\_1193439, EPI\_ISL\_1193443, EPI\_ISL\_1193444, EPI\_ISL\_1193446, EPI\_ISL\_1193466, EPI\_ISL\_1193472, EPI\_ISL\_1193479, EPI\_ISL\_1193481, EPI\_ISL\_1193483, EPI\_ISL\_1193484, EPI\_ISL\_1193486, EPI\_ISL\_1193487, EPI\_ISL\_1193490, EPI\_ISL\_1193491, EPI\_ISL\_1193492, EPI\_ISL\_1193493, EPI\_ISL\_1193494, EPI\_ISL\_1193498, EPI\_ISL\_1193503, EPI\_ISL\_1193504, EPI\_ISL\_1193505, EPI\_ISL\_1193506, EPI\_ISL\_1193511, EPI\_ISL\_1193514, EPI\_ISL\_1193515, EPI\_ISL\_1193518, EPI\_ISL\_1193522, EPI\_ISL\_1193523, EPI\_ISL\_1193524, EPI\_ISL\_1193525, EPI\_ISL\_1193526, EPI\_ISL\_1193527, EPI\_ISL\_1193530, EPI\_ISL\_1193532, EPI\_ISL\_1193533, EPI\_ISL\_1193534, EPI\_ISL\_1193535, EPI\_ISL\_1193538, EPI\_ISL\_1193546, EPI\_ISL\_1193548, EPI\_ISL\_1193552, EPI\_ISL\_1193557, EPI\_ISL\_1193559, EPI\_ISL\_1193562, EPI\_ISL\_1193570, EPI\_ISL\_1193571, EPI\_ISL\_1193576, EPI\_ISL\_1193585, EPI\_ISL\_1193588, EPI\_ISL\_1193601, EPI\_ISL\_1193607, EPI\_ISL\_1193628, EPI\_ISL\_1193630, EPI\_ISL\_1193637, EPI\_ISL\_1193780, EPI\_ISL\_1193784, EPI\_ISL\_1193799, EPI\_ISL\_1193803, EPI\_ISL\_1193810, EPI\_ISL\_1193831, EPI\_ISL\_1193862, EPI\_ISL\_1193877, EPI\_ISL\_1193892, EPI\_ISL\_1193899, EPI\_ISL\_1193913, EPI\_ISL\_1193914, EPI\_ISL\_1193916, EPI\_ISL\_1193917, EPI\_ISL\_1193918, EPI\_ISL\_1193919, EPI\_ISL\_1193920, EPI\_ISL\_1193921, EPI\_ISL\_1193923, EPI\_ISL\_1193924, EPI\_ISL\_1193925, EPI\_ISL\_1193926, EPI\_ISL\_1193927, EPI\_ISL\_1193928, EPI\_ISL\_1193929, EPI\_ISL\_1193931, EPI\_ISL\_1193932, EPI\_ISL\_1193933, EPI\_ISL\_1193934, EPI\_ISL\_1193935, EPI\_ISL\_1193936, EPI\_ISL\_1193939, EPI\_ISL\_1193943, EPI\_ISL\_1193944, EPI\_ISL\_1193945, EPI\_ISL\_1193946, EPI\_ISL\_1193947, EPI\_ISL\_1193950, EPI\_ISL\_1193951, EPI\_ISL\_1193952, EPI\_ISL\_1193953, EPI\_ISL\_1193956, EPI\_ISL\_1193957, EPI\_ISL\_1193959, EPI\_ISL\_1193960, EPI\_ISL\_1193961, EPI\_ISL\_1193962, EPI\_ISL\_1193964, EPI\_ISL\_1193966, EPI\_ISL\_1193967, EPI\_ISL\_1193968, EPI\_ISL\_1193969, EPI\_ISL\_1193970, EPI\_ISL\_1193971, EPI\_ISL\_1193976, EPI\_ISL\_1193977, EPI\_ISL\_1193978, EPI\_ISL\_1193979, EPI\_ISL\_1193981, EPI\_ISL\_1193982, EPI\_ISL\_1193984, EPI\_ISL\_1193986, EPI\_ISL\_1193991, EPI\_ISL\_1193994, EPI\_ISL\_1193995, EPI\_ISL\_1193996, EPI\_ISL\_1193998, EPI\_ISL\_1194000, EPI\_ISL\_1194002, EPI\_ISL\_1194003, EPI\_ISL\_1194004, EPI\_ISL\_1194005, EPI\_ISL\_1194006, EPI\_ISL\_1194007, EPI\_ISL\_1194008, EPI\_ISL\_1194009, EPI\_ISL\_1194010, EPI\_ISL\_1194013, EPI\_ISL\_1194016, EPI\_ISL\_1194017, EPI\_ISL\_1194018, EPI\_ISL\_1194020, EPI\_ISL\_1194021, EPI\_ISL\_1194022, EPI\_ISL\_1194023, EPI\_ISL\_1194024, EPI\_ISL\_1194025, EPI\_ISL\_1194026, EPI\_ISL\_1194027, EPI\_ISL\_1194028, EPI\_ISL\_1194029, EPI\_ISL\_1194030, EPI\_ISL\_1194031, EPI\_ISL\_1194032, EPI\_ISL\_1194033, EPI\_ISL\_1194034, EPI\_ISL\_1194035, EPI\_ISL\_1194037, EPI\_ISL\_1194039, EPI\_ISL\_1194040, EPI\_ISL\_1194042, EPI\_ISL\_1194113, EPI\_ISL\_1194125, EPI\_ISL\_1194172, EPI\_ISL\_1194173, EPI\_ISL\_1194175, EPI\_ISL\_1194186, EPI\_ISL\_1194195, EPI\_ISL\_1194196, EPI\_ISL\_1194198, EPI\_ISL\_1194202, EPI\_ISL\_1194207, EPI\_ISL\_1194214, EPI\_ISL\_1194227, EPI\_ISL\_1194229, EPI\_ISL\_1194236, EPI\_ISL\_1194245, EPI\_ISL\_1194247, EPI\_ISL\_1194263, EPI\_ISL\_1194270, EPI\_ISL\_1194275, EPI\_ISL\_1194276, EPI\_ISL\_1194281, EPI\_ISL\_1194283, EPI\_ISL\_1194284, EPI\_ISL\_1194289, EPI\_ISL\_1194291, EPI\_ISL\_1194297, EPI\_ISL\_1194298, EPI\_ISL\_1194299, EPI\_ISL\_1194307, EPI\_ISL\_1194315, EPI\_ISL\_1194316, EPI\_ISL\_1194320, EPI\_ISL\_1194330, EPI\_ISL\_1194343, EPI\_ISL\_1194345, EPI\_ISL\_1194354, EPI\_ISL\_1194355, EPI\_ISL\_1194420, EPI\_ISL\_1194488

see above Quest Diagnostics Incorporated Centers for Disease Control and Prevention Division of Viral Diseases, Pathogen Discovery Peter W. Cook, Dakota Howard, Dhvani Batra, Ben L. Rambo-Martin, S. H. Rosenthal, A. Gerasimova, R. M. Kagan, B. Anderson, M. Hua, Y. Liu, L.E. Bernstein, K.E. Livingston, A. Perez, I. A. Shlyakhter, R. V. Rolando, R. Owen, P. Tanpaiboon, F. Lacbawan, Clinton R. Paden, Suxiang Tong, Duncan MacCannell

EPI\_ISL\_1194743, EPI\_ISL\_1194746, EPI\_ISL\_1194808, EPI\_ISL\_1194818 Helix/Illumina Centers for Disease Control and Prevention Division of Viral Diseases, Pathogen Discovery Peter W. Cook, Dakota Howard, Dhvani Batra, Ben L. Rambo-Martin, Eileen de Feo, Jan Antico, Christine Tran, Matthew Tolentino, Shannon Wickline, Kim Gietzen, Brad Sickler, Jingtao Liu, Eric Allen, Phil Feebo, Summer Galloway, Nicole L. Washington, Simon White, Germyt Levan, Kelly Schiabor Barret, Elizabeth Cirulli, Alexandre Bolze, Ary Ascencio, Charlotte Rivera-Garcia, Ryan Cho, Jason Nguyen, Sherry Wang, Jaimin Ramirez, Tyler Cassens, Eren Sandoval, Magnus Isaksson, William Lee, David Becker, Marc Laurent, James Lu, Clinton R. Paden, Suxiang Tong, Duncan MacCannell

EPI\_ISL\_1195800, EPI\_ISL\_1195863 NYU Langone Health Departments of Pathology and Medicine, New York University School of Medicine Adriana Heguy, Dacia Dimartino, Emily Guzman, Christian Marier, Peter Meyn, Sitharam Ramaswami, Gael Westby, Paul Zappile, Yutong Zhang, Paolo Cotzia, Guqing Wang

EPI\_ISL\_1196775, EPI\_ISL\_1196776, EPI\_ISL\_1196778, EPI\_ISL\_1196779, EPI\_ISL\_1196780, EPI\_ISL\_1196781, EPI\_ISL\_1196782, EPI\_ISL\_1196783, EPI\_ISL\_1196784, EPI\_ISL\_1196785, EPI\_ISL\_1196786, EPI\_ISL\_1196787, EPI\_ISL\_1196788, EPI\_ISL\_1196789, EPI\_ISL\_1196790, EPI\_ISL\_1196791

see above Alameda County Public Health Department Alameda County Public Health Department Kristna Hsieh, Maria Elma, Kevin Libuit  
 EPI\_ISL\_1197042 USC Clinical Lab Los Angeles County PHL P. Hemarajata et al.  
 EPI\_ISL\_1197043 Martin Luther King Jr. Community Hospital Los Angeles County PHL P. Hemarajata et al.  
 EPI\_ISL\_1197044 USC Clinical Lab Los Angeles County PHL P. Hemarajata et al.  
 EPI\_ISL\_1197045 Martin Luther King Jr. Community Hospital Los Angeles County PHL P. Hemarajata et al.  
 EPI\_ISL\_1197046, EPI\_ISL\_1197047 USC Clinical Lab Los Angeles County PHL P. Hemarajata et al.  
 EPI\_ISL\_1197048, EPI\_ISL\_1197050, EPI\_ISL\_1197052 Martin Luther King Jr. Community Hospital Los Angeles County PHL P. Hemarajata et al.  
 EPI\_ISL\_1197053 USC Clinical Lab Los Angeles County PHL P. Hemarajata et al.  
 EPI\_ISL\_1197054, EPI\_ISL\_1197055, EPI\_ISL\_1197056, EPI\_ISL\_1197057 Martin Luther King Jr. Community Hospital Los Angeles County PHL P. Hemarajata et al.  
 EPI\_ISL\_1197059, EPI\_ISL\_1197060, EPI\_ISL\_1197061 Flow Diagnostics Lab Los Angeles County PHL P. Hemarajata et al.  
 EPI\_ISL\_1201559 USC Clinical Lab Los Angeles County PHL P. Hemarajata et al.  
 EPI\_ISL\_1205474, EPI\_ISL\_1205476, EPI\_ISL\_1205477, EPI\_ISL\_1205480, EPI\_ISL\_1205481, EPI\_ISL\_1205483, EPI\_ISL\_1205484 Alameda County Public Health Department Alameda County Public Health Department Kristna Hsieh, Maria Elma, Kevin Libuit

EPI\_ISL\_1220375, EPI\_ISL\_1220429, EPI\_ISL\_1220507, EPI\_ISL\_1220520, EPI\_ISL\_1220547, EPI\_ISL\_1220596, EPI\_ISL\_1220611, EPI\_ISL\_1220611, EPI\_ISL\_1220629, EPI\_ISL\_1220636, EPI\_ISL\_1220660, EPI\_ISL\_1220661, EPI\_ISL\_1220662, EPI\_ISL\_1220667, EPI\_ISL\_1220672, EPI\_ISL\_1220687, EPI\_ISL\_1220695, EPI\_ISL\_1220715, EPI\_ISL\_1220723, EPI\_ISL\_1220724, EPI\_ISL\_1220730, EPI\_ISL\_1220739, EPI\_ISL\_1220740, EPI\_ISL\_1220741, EPI\_ISL\_1220743, EPI\_ISL\_1220745, EPI\_ISL\_1220747, EPI\_ISL\_1220749, EPI\_ISL\_1220751, EPI\_ISL\_1220753, EPI\_ISL\_1220754, EPI\_ISL\_1220757, EPI\_ISL\_1220761, EPI\_ISL\_1220766, EPI\_ISL\_1220767, EPI\_ISL\_1220776, EPI\_ISL\_1220778, EPI\_ISL\_1220783, EPI\_ISL\_1220784, EPI\_ISL\_1220786, EPI\_ISL\_1220792, EPI\_ISL\_1220794, EPI\_ISL\_1220796, EPI\_ISL\_1220797, EPI\_ISL\_1220798, EPI\_ISL\_1220801, EPI\_ISL\_1220804, EPI\_ISL\_1220806, EPI\_ISL\_1220808, EPI\_ISL\_1220811, EPI\_ISL\_1220817, EPI\_ISL\_1220818, EPI\_ISL\_1220820, EPI\_ISL\_1220827, EPI\_ISL\_1220831, EPI\_ISL\_1220832, EPI\_ISL\_1220833, EPI\_ISL\_1220834, EPI\_ISL\_1220835, EPI\_ISL\_1220837, EPI\_ISL\_1220838, EPI\_ISL\_1220841, EPI\_ISL\_1220843, EPI\_ISL\_1220845, EPI\_ISL\_1220859, EPI\_ISL\_1220860, EPI\_ISL\_1220861

see above Quest Diagnostics Incorporated Centers for Disease Control and Prevention Division of Viral Diseases, Pathogen Discovery Peter W. Cook, Dakota Howard, Dhvani Batra, Ben L. Rambo-Martin, S. H. Rosenthal, A. Gerasimova, R. M. Kagan, B. Anderson, M. Hua, Y. Liu, L.E. Bernstein, K.E. Livingston, A. Perez, I. A. Shlyakhter, R. V. Rolando, R. Owen, P. Tanpaiboon, F. Lacbawan, Clinton R. Paden, Suxiang Tong, Duncan MacCannell

EPI\_ISL\_1221302, EPI\_ISL\_1221420, EPI\_ISL\_1221702, EPI\_ISL\_1221740, EPI\_ISL\_1221810, EPI\_ISL\_1221864 Laboratory Corporation of America Centers for Disease Control and Prevention Division of Viral Diseases, Pathogen Discovery Peter W. Cook, Dakota Howard, Dhvani Batra, Ben L. Rambo-Martin, Mino Agarwal, Eyad Almasri, Debbie Boles, Ayla Burns, Nuthawin Charoensri, Oren Cohen, Susan Contryman, Mary Ann Cristobal, Bobbi Croy, Suzanne Dale, Hrushikesh Deshmukh, Amanda Douglas, Vincent Drouillon, Marcia Eisenberg, Howard Engler, Rama Ghatti, Prashant Gupta, Susan Hicks, Jake Humphrey, Lax Iyer, Manoj Jain, Mohan Kolli, Brian Krueger, Tim Kuphal, Stanley Letovsky, Michael Levandoski, Craig Lukasik, Jonathan Meltzer, Brian Norvell, Mindy Nye, Scott Parker, Christos Petropoulos, John Pruitt, Steven Ragan, Scott Ryan, Mike Sapeta, Jana Schroth, Suresh Babu Selvaraju, Goran Stevovic, Amanda Suchanek, Andrea Throop, Lyndon Tilson, Thomas Urban, Joe Voshell, Kimberly Wagner, Jonathan Williams, Mary Williamson, Qian Zeng, Tricia Zwiefelhofer, Clinton R. Paden, Suxiang Tong, Duncan MacCannell

EPI\_ISL\_1222757 Santa Clara County Public Health Laboratory Santa Clara County Public Health Laboratory Santa Clara County Public Health Department  
 EPI\_ISL\_1226169, EPI\_ISL\_1226170, EPI\_ISL\_1226171, EPI\_ISL\_1226172, EPI\_ISL\_1226173, EPI\_ISL\_1226174, EPI\_ISL\_1226175, EPI\_ISL\_1226176 CA-Los Angeles County Public Health Laboratory Genomics and Discovery, Respiratory Viruses Branch, Division of Viral Diseases, Centers for Disease Control and Prevention Krista Queen, Yan Li, Ying Tao, Jing Zhang, Anna Uehara, Anna Montmayeur, Clinton R. Paden, Kristen Knipe, Matthew Scherer, Shoshona Le, Katie Dillon, Peter W. Cook, Rachel Marine, Mili Sheth, Jasmine Padilla, Sarah Nobles, Mark Burroughs, Lori Rowe, Haibin Wang, Ben L. Rambo-Martin, Kristine Lacey, Sam Shepard, Dhvani Batra, Suxiang Tong, Justin Lee

EPI\_ISL\_1226239, EPI\_ISL\_1226240, EPI\_ISL\_1226241, EPI\_ISL\_1226242, EPI\_ISL\_1226243, EPI\_ISL\_1226244, EPI\_ISL\_1226245, EPI\_ISL\_1226246, EPI\_ISL\_1226247, EPI\_ISL\_1226248, EPI\_ISL\_1226249, EPI\_ISL\_1226250, EPI\_ISL\_1226252, EPI\_ISL\_1226253, EPI\_ISL\_1226254, EPI\_ISL\_1226256, EPI\_ISL\_1226257, EPI\_ISL\_1226258, EPI\_ISL\_1226259, EPI\_ISL\_1226260, EPI\_ISL\_1226261, EPI\_ISL\_1226262, EPI\_ISL\_1226264, EPI\_ISL\_1226265, EPI\_ISL\_1226266, EPI\_ISL\_1226267, EPI\_ISL\_1226269, EPI\_ISL\_1226270, EPI\_ISL\_1226271, EPI\_ISL\_1226272, EPI\_ISL\_1226273, EPI\_ISL\_1226275

see above "CDPH, Viral and Rickettsial Disease Laboratory" Genomics and Discovery, Respiratory Viruses Branch, Division of Viral Diseases, Centers for Disease Control and Prevention Krista Queen, Yan Li, Ying Tao, Jing Zhang, Anna Uehara, Anna Montmayeur, Clinton R. Paden, Kristen Knipe, Matthew Scherer, Shoshona Le, Katie Dillon, Peter W. Cook, Rachel Marine, Mili Sheth, Jasmine Padilla, Sarah Nobles, Mark Burroughs, Lori Rowe, Haibin Wang, Ben L. Rambo-Martin, Kristine Lacey, Sam Shepard, Dhvani Batra, Suxiang Tong, Justin Lee

EPI\_ISL\_1231454, EPI\_ISL\_1231514, EPI\_ISL\_1231517, EPI\_ISL\_1231528, EPI\_ISL\_1231557, EPI\_ISL\_1231569, EPI\_ISL\_1231598, EPI\_ISL\_1231642, EPI\_ISL\_1231776, EPI\_ISL\_1231779, EPI\_ISL\_1231781, EPI\_ISL\_1231785, EPI\_ISL\_1231786, EPI\_ISL\_1231790, EPI\_ISL\_1231848, EPI\_ISL\_1231856, EPI\_ISL\_1231859, EPI\_ISL\_1231863, EPI\_ISL\_1231866, EPI\_ISL\_1231871, EPI\_ISL\_1231876, EPI\_ISL\_1231880, EPI\_ISL\_1231881, EPI\_ISL\_1231882, EPI\_ISL\_1231883, EPI\_ISL\_1231884, EPI\_ISL\_1231885, EPI\_ISL\_1231886, EPI\_ISL\_1231887, EPI\_ISL\_1231888, EPI\_ISL\_1231889, EPI\_ISL\_1231894, EPI\_ISL\_1231897, EPI\_ISL\_1231898, EPI\_ISL\_1231899, EPI\_ISL\_1231901, EPI\_ISL\_1231905, EPI\_ISL\_1231906, EPI\_ISL\_1231907, EPI\_ISL\_1231908, EPI\_ISL\_1231909, EPI\_ISL\_1231910, EPI\_ISL\_1231912, EPI\_ISL\_1231913, EPI\_ISL\_1232087, EPI\_ISL\_1232088, EPI\_ISL\_1232108, EPI\_ISL\_1232127, EPI\_ISL\_1232128, EPI\_ISL\_1232131, EPI\_ISL\_1232132, EPI\_ISL\_1232135, EPI\_ISL\_1232136, EPI\_ISL\_1232137, EPI\_ISL\_1232138, EPI\_ISL\_1232141, EPI\_ISL\_1232142, EPI\_ISL\_1232161, EPI\_ISL\_1232162, EPI\_ISL\_1232163, EPI\_ISL\_1232164, EPI\_ISL\_1232165, EPI\_ISL\_1232166

|                                                                                                                                                                                                                                                                                                                                                                                                                                                                                                                                                                                                                                                                                                                         |                                                    |                        |                                                                                                          |
|-------------------------------------------------------------------------------------------------------------------------------------------------------------------------------------------------------------------------------------------------------------------------------------------------------------------------------------------------------------------------------------------------------------------------------------------------------------------------------------------------------------------------------------------------------------------------------------------------------------------------------------------------------------------------------------------------------------------------|----------------------------------------------------|------------------------|----------------------------------------------------------------------------------------------------------|
| see above                                                                                                                                                                                                                                                                                                                                                                                                                                                                                                                                                                                                                                                                                                               | Fulgent Genetics                                   | Fulgent Genetics       | Harry Gao, Mickey Li, John Gao, Joseph Fierro, Benafsh Sapra, Becky Tsai, Yan Meng, Doreen Ng, James Xie |
| EPI_ISL_1234787                                                                                                                                                                                                                                                                                                                                                                                                                                                                                                                                                                                                                                                                                                         | Santa Clara County Public Health Laboratory        | Chan-Zuckerberg Biohub | CZB Ciiahub Consortium                                                                                   |
| EPI_ISL_1234791, EPI_ISL_1234796, EPI_ISL_1234797                                                                                                                                                                                                                                                                                                                                                                                                                                                                                                                                                                                                                                                                       | Orange County Public Health Lab                    | Chan-Zuckerberg Biohub | CZB Ciiahub Consortium                                                                                   |
| EPI_ISL_1234798                                                                                                                                                                                                                                                                                                                                                                                                                                                                                                                                                                                                                                                                                                         | Santa Clara County Public Health Laboratory        | Chan-Zuckerberg Biohub | CZB Ciiahub Consortium                                                                                   |
| EPI_ISL_1234806                                                                                                                                                                                                                                                                                                                                                                                                                                                                                                                                                                                                                                                                                                         | County of San Luis Obispo Public Health Laboratory | Chan-Zuckerberg Biohub | CZB Ciiahub Consortium                                                                                   |
| EPI_ISL_1234812                                                                                                                                                                                                                                                                                                                                                                                                                                                                                                                                                                                                                                                                                                         | Santa Clara County Public Health Laboratory        | Chan-Zuckerberg Biohub | CZB Ciiahub Consortium                                                                                   |
| EPI_ISL_1234828                                                                                                                                                                                                                                                                                                                                                                                                                                                                                                                                                                                                                                                                                                         | Orange County Public Health Lab                    | Chan-Zuckerberg Biohub | CZB Ciiahub Consortium                                                                                   |
| EPI_ISL_1234837                                                                                                                                                                                                                                                                                                                                                                                                                                                                                                                                                                                                                                                                                                         | Santa Clara County Public Health Laboratory        | Chan-Zuckerberg Biohub | CZB Ciiahub Consortium                                                                                   |
| EPI_ISL_1234842                                                                                                                                                                                                                                                                                                                                                                                                                                                                                                                                                                                                                                                                                                         | Orange County Public Health Lab                    | Chan-Zuckerberg Biohub | CZB Ciiahub Consortium                                                                                   |
| EPI_ISL_1234843                                                                                                                                                                                                                                                                                                                                                                                                                                                                                                                                                                                                                                                                                                         | Santa Clara County Public Health Laboratory        | Chan-Zuckerberg Biohub | CZB Ciiahub Consortium                                                                                   |
| EPI_ISL_1234847                                                                                                                                                                                                                                                                                                                                                                                                                                                                                                                                                                                                                                                                                                         | Orange County Public Health Lab                    | Chan-Zuckerberg Biohub | CZB Ciiahub Consortium                                                                                   |
| EPI_ISL_1234850, EPI_ISL_1234851, EPI_ISL_1234854                                                                                                                                                                                                                                                                                                                                                                                                                                                                                                                                                                                                                                                                       | Santa Clara County Public Health Laboratory        | Chan-Zuckerberg Biohub | CZB Ciiahub Consortium                                                                                   |
| EPI_ISL_1234855                                                                                                                                                                                                                                                                                                                                                                                                                                                                                                                                                                                                                                                                                                         | Orange County Public Health Lab                    | Chan-Zuckerberg Biohub | CZB Ciiahub Consortium                                                                                   |
| EPI_ISL_1234857                                                                                                                                                                                                                                                                                                                                                                                                                                                                                                                                                                                                                                                                                                         | Santa Clara County Public Health Laboratory        | Chan-Zuckerberg Biohub | CZB Ciiahub Consortium                                                                                   |
| EPI_ISL_1234864                                                                                                                                                                                                                                                                                                                                                                                                                                                                                                                                                                                                                                                                                                         | Orange County Public Health Lab                    | Chan-Zuckerberg Biohub | CZB Ciiahub Consortium                                                                                   |
| EPI_ISL_1234865, EPI_ISL_1234866, EPI_ISL_1234875, EPI_ISL_1234878, EPI_ISL_1234880, EPI_ISL_1234884                                                                                                                                                                                                                                                                                                                                                                                                                                                                                                                                                                                                                    | Santa Clara County Public Health Laboratory        | Chan-Zuckerberg Biohub | CZB Ciiahub Consortium                                                                                   |
| EPI_ISL_1234887                                                                                                                                                                                                                                                                                                                                                                                                                                                                                                                                                                                                                                                                                                         | Orange County Public Health Lab                    | Chan-Zuckerberg Biohub | CZB Ciiahub Consortium                                                                                   |
| EPI_ISL_1234897, EPI_ISL_1234899, EPI_ISL_1234902                                                                                                                                                                                                                                                                                                                                                                                                                                                                                                                                                                                                                                                                       | Santa Clara County Public Health Laboratory        | Chan-Zuckerberg Biohub | CZB Ciiahub Consortium                                                                                   |
| EPI_ISL_1234909                                                                                                                                                                                                                                                                                                                                                                                                                                                                                                                                                                                                                                                                                                         | Orange County Public Health Lab                    | Chan-Zuckerberg Biohub | CZB Ciiahub Consortium                                                                                   |
| EPI_ISL_1234913, EPI_ISL_1234917                                                                                                                                                                                                                                                                                                                                                                                                                                                                                                                                                                                                                                                                                        | Santa Clara County Public Health Laboratory        | Chan-Zuckerberg Biohub | CZB Ciiahub Consortium                                                                                   |
| EPI_ISL_1234918, EPI_ISL_1234926, EPI_ISL_1234929                                                                                                                                                                                                                                                                                                                                                                                                                                                                                                                                                                                                                                                                       | Orange County Public Health Lab                    | Chan-Zuckerberg Biohub | CZB Ciiahub Consortium                                                                                   |
| EPI_ISL_1234935                                                                                                                                                                                                                                                                                                                                                                                                                                                                                                                                                                                                                                                                                                         | Santa Clara County Public Health Laboratory        | Chan-Zuckerberg Biohub | CZB Ciiahub Consortium                                                                                   |
| EPI_ISL_1234937                                                                                                                                                                                                                                                                                                                                                                                                                                                                                                                                                                                                                                                                                                         | Orange County Public Health Lab                    | Chan-Zuckerberg Biohub | CZB Ciiahub Consortium                                                                                   |
| EPI_ISL_1234938                                                                                                                                                                                                                                                                                                                                                                                                                                                                                                                                                                                                                                                                                                         | County of San Luis Obispo Public Health Laboratory | Chan-Zuckerberg Biohub | CZB Ciiahub Consortium                                                                                   |
| EPI_ISL_1234940, EPI_ISL_1234943, EPI_ISL_1234945                                                                                                                                                                                                                                                                                                                                                                                                                                                                                                                                                                                                                                                                       | Orange County Public Health Lab                    | Chan-Zuckerberg Biohub | CZB Ciiahub Consortium                                                                                   |
| EPI_ISL_1234946                                                                                                                                                                                                                                                                                                                                                                                                                                                                                                                                                                                                                                                                                                         | Santa Clara County Public Health Laboratory        | Chan-Zuckerberg Biohub | CZB Ciiahub Consortium                                                                                   |
| EPI_ISL_1234954                                                                                                                                                                                                                                                                                                                                                                                                                                                                                                                                                                                                                                                                                                         | Orange County Public Health Lab                    | Chan-Zuckerberg Biohub | CZB Ciiahub Consortium                                                                                   |
| EPI_ISL_1234957                                                                                                                                                                                                                                                                                                                                                                                                                                                                                                                                                                                                                                                                                                         | Santa Clara County Public Health Laboratory        | Chan-Zuckerberg Biohub | CZB Ciiahub Consortium                                                                                   |
| EPI_ISL_1234958, EPI_ISL_1234965                                                                                                                                                                                                                                                                                                                                                                                                                                                                                                                                                                                                                                                                                        | Orange County Public Health Lab                    | Chan-Zuckerberg Biohub | CZB Ciiahub Consortium                                                                                   |
| EPI_ISL_1234973, EPI_ISL_1234975, EPI_ISL_1234976, EPI_ISL_1234983, EPI_ISL_1234985, EPI_ISL_1234988, EPI_ISL_1234991, EPI_ISL_1234996                                                                                                                                                                                                                                                                                                                                                                                                                                                                                                                                                                                  | Santa Clara County Public Health Laboratory        | Chan-Zuckerberg Biohub | CZB Ciiahub Consortium                                                                                   |
| EPI_ISL_1234997                                                                                                                                                                                                                                                                                                                                                                                                                                                                                                                                                                                                                                                                                                         | Orange County Public Health Lab                    | Chan-Zuckerberg Biohub | CZB Ciiahub Consortium                                                                                   |
| EPI_ISL_1234999                                                                                                                                                                                                                                                                                                                                                                                                                                                                                                                                                                                                                                                                                                         | Santa Clara County Public Health Laboratory        | Chan-Zuckerberg Biohub | CZB Ciiahub Consortium                                                                                   |
| EPI_ISL_1235007, EPI_ISL_1235008, EPI_ISL_1235009, EPI_ISL_1235016                                                                                                                                                                                                                                                                                                                                                                                                                                                                                                                                                                                                                                                      | Orange County Public Health Lab                    | Chan-Zuckerberg Biohub | CZB Ciiahub Consortium                                                                                   |
| EPI_ISL_1235017, EPI_ISL_1235019, EPI_ISL_1235020, EPI_ISL_1235024, EPI_ISL_1235031, EPI_ISL_1235038                                                                                                                                                                                                                                                                                                                                                                                                                                                                                                                                                                                                                    | Santa Clara County Public Health Laboratory        | Chan-Zuckerberg Biohub | CZB Ciiahub Consortium                                                                                   |
| EPI_ISL_1235044                                                                                                                                                                                                                                                                                                                                                                                                                                                                                                                                                                                                                                                                                                         | Orange County Public Health Lab                    | Chan-Zuckerberg Biohub | CZB Ciiahub Consortium                                                                                   |
| EPI_ISL_1235047, EPI_ISL_1235049                                                                                                                                                                                                                                                                                                                                                                                                                                                                                                                                                                                                                                                                                        | Santa Clara County Public Health Laboratory        | Chan-Zuckerberg Biohub | CZB Ciiahub Consortium                                                                                   |
| EPI_ISL_1235057, EPI_ISL_1235058                                                                                                                                                                                                                                                                                                                                                                                                                                                                                                                                                                                                                                                                                        | Orange County Public Health Lab                    | Chan-Zuckerberg Biohub | CZB Ciiahub Consortium                                                                                   |
| EPI_ISL_1235065, EPI_ISL_1235066, EPI_ISL_1235073, EPI_ISL_1235086, EPI_ISL_1235096, EPI_ISL_1235101, EPI_ISL_1235103, EPI_ISL_1235109, EPI_ISL_1235110, EPI_ISL_1235114, EPI_ISL_1235129, EPI_ISL_1235131, EPI_ISL_1235151, EPI_ISL_1235156, EPI_ISL_1235163, EPI_ISL_1235174, EPI_ISL_1235205, EPI_ISL_1235207, EPI_ISL_1235215, EPI_ISL_1235216, EPI_ISL_1235218, EPI_ISL_1235227, EPI_ISL_1235231, EPI_ISL_1235233, EPI_ISL_1235253, EPI_ISL_1235265, EPI_ISL_1235268, EPI_ISL_1235275, EPI_ISL_1235296, EPI_ISL_1235305, EPI_ISL_1235327, EPI_ISL_1235333, EPI_ISL_1235336, EPI_ISL_1235337, EPI_ISL_1235340, EPI_ISL_1235341, EPI_ISL_1235343, EPI_ISL_1235347, EPI_ISL_1235349, EPI_ISL_1235350, EPI_ISL_1235356 | Contra Costa County Public Health Lab              | Chan-Zuckerberg Biohub | CZB Ciiahub Consortium                                                                                   |
| see above                                                                                                                                                                                                                                                                                                                                                                                                                                                                                                                                                                                                                                                                                                               | Contra Costa County Public Health Lab              | Chan-Zuckerberg Biohub | CZB Ciiahub Consortium                                                                                   |
| EPI_ISL_1235360                                                                                                                                                                                                                                                                                                                                                                                                                                                                                                                                                                                                                                                                                                         | CA DPH Viral and Rickettsial Disease Laboratory    | Chan-Zuckerberg Biohub | CZB Ciiahub Consortium                                                                                   |
| EPI_ISL_1235362                                                                                                                                                                                                                                                                                                                                                                                                                                                                                                                                                                                                                                                                                                         | Santa Clara County Public Health Laboratory        | Chan-Zuckerberg Biohub | CZB Ciiahub Consortium                                                                                   |
| EPI_ISL_1235367                                                                                                                                                                                                                                                                                                                                                                                                                                                                                                                                                                                                                                                                                                         | CA DPH Viral and Rickettsial Disease Laboratory    | Chan-Zuckerberg Biohub | CZB Ciiahub Consortium                                                                                   |
| EPI_ISL_1235370                                                                                                                                                                                                                                                                                                                                                                                                                                                                                                                                                                                                                                                                                                         | Santa Clara County Public Health Laboratory        | Chan-Zuckerberg Biohub | CZB Ciiahub Consortium                                                                                   |
| EPI_ISL_1235372, EPI_ISL_1235373, EPI_ISL_1235375, EPI_ISL_1235377, EPI_ISL_1235378                                                                                                                                                                                                                                                                                                                                                                                                                                                                                                                                                                                                                                     | CA DPH Viral and Rickettsial Disease Laboratory    | Chan-Zuckerberg Biohub | CZB Ciiahub Consortium                                                                                   |
| EPI_ISL_1235379                                                                                                                                                                                                                                                                                                                                                                                                                                                                                                                                                                                                                                                                                                         | Santa Clara County Public Health Laboratory        | Chan-Zuckerberg Biohub | CZB Ciiahub Consortium                                                                                   |
| EPI_ISL_1235381                                                                                                                                                                                                                                                                                                                                                                                                                                                                                                                                                                                                                                                                                                         | CA DPH Viral and Rickettsial Disease Laboratory    | Chan-Zuckerberg Biohub | CZB Ciiahub Consortium                                                                                   |
| EPI_ISL_1235382                                                                                                                                                                                                                                                                                                                                                                                                                                                                                                                                                                                                                                                                                                         | Santa Clara County Public Health Laboratory        | Chan-Zuckerberg Biohub | CZB Ciiahub Consortium                                                                                   |



|                                                                                                                                                                                                                                                                                                                                                                                                                                                                                                                                                                                                                                                                                                                                                                                                                                                                                                                                                                                                                                                                                                                                                                                                                                                                                                                                                                                                                                                                                                                                                                                                                                                                                                                                                                                                                                                                                                                                                                                                                                                                                                                                                                                                                                                                                                                                                                                                                                                                                                                                                                                                                                                                                                                                                                                                                                                                                                                     |           |                                                |                                                                                           |                                                                                                                                                                                                                                                                                                                                                                                                                                                                                                                                                                                                                                                                                                                                                                                                                                                                                                        |
|---------------------------------------------------------------------------------------------------------------------------------------------------------------------------------------------------------------------------------------------------------------------------------------------------------------------------------------------------------------------------------------------------------------------------------------------------------------------------------------------------------------------------------------------------------------------------------------------------------------------------------------------------------------------------------------------------------------------------------------------------------------------------------------------------------------------------------------------------------------------------------------------------------------------------------------------------------------------------------------------------------------------------------------------------------------------------------------------------------------------------------------------------------------------------------------------------------------------------------------------------------------------------------------------------------------------------------------------------------------------------------------------------------------------------------------------------------------------------------------------------------------------------------------------------------------------------------------------------------------------------------------------------------------------------------------------------------------------------------------------------------------------------------------------------------------------------------------------------------------------------------------------------------------------------------------------------------------------------------------------------------------------------------------------------------------------------------------------------------------------------------------------------------------------------------------------------------------------------------------------------------------------------------------------------------------------------------------------------------------------------------------------------------------------------------------------------------------------------------------------------------------------------------------------------------------------------------------------------------------------------------------------------------------------------------------------------------------------------------------------------------------------------------------------------------------------------------------------------------------------------------------------------------------------|-----------|------------------------------------------------|-------------------------------------------------------------------------------------------|--------------------------------------------------------------------------------------------------------------------------------------------------------------------------------------------------------------------------------------------------------------------------------------------------------------------------------------------------------------------------------------------------------------------------------------------------------------------------------------------------------------------------------------------------------------------------------------------------------------------------------------------------------------------------------------------------------------------------------------------------------------------------------------------------------------------------------------------------------------------------------------------------------|
| EPI_ISL_1254169, EPI_ISL_1254176, EPI_ISL_1254180, EPI_ISL_1254181, EPI_ISL_1254183, EPI_ISL_1254186, EPI_ISL_1254188, EPI_ISL_1254192, EPI_ISL_1254193, EPI_ISL_1254198, EPI_ISL_1254200, EPI_ISL_1254206, EPI_ISL_1254209, EPI_ISL_1254210, EPI_ISL_1254213, EPI_ISL_1254216, EPI_ISL_1254217, EPI_ISL_1254218, EPI_ISL_1254220, EPI_ISL_1254221, EPI_ISL_1254222, EPI_ISL_1254224, EPI_ISL_1254227, EPI_ISL_1254241, EPI_ISL_1254262, EPI_ISL_1254267, EPI_ISL_1254273, EPI_ISL_1254275, EPI_ISL_1254278, EPI_ISL_1254281, EPI_ISL_1254286, EPI_ISL_1254292, EPI_ISL_1254294, EPI_ISL_1254300, EPI_ISL_1254301, EPI_ISL_1254302, EPI_ISL_1254304, EPI_ISL_1254306, EPI_ISL_1254307, EPI_ISL_1254308, EPI_ISL_1254313, EPI_ISL_1254316, EPI_ISL_1254320, EPI_ISL_1254344, EPI_ISL_1254360, EPI_ISL_1254379, EPI_ISL_1254432, EPI_ISL_1254433, EPI_ISL_1254464, EPI_ISL_1254465, EPI_ISL_1254470, EPI_ISL_1254477, EPI_ISL_1254491                                                                                                                                                                                                                                                                                                                                                                                                                                                                                                                                                                                                                                                                                                                                                                                                                                                                                                                                                                                                                                                                                                                                                                                                                                                                                                                                                                                                                                                                                                                                                                                                                                                                                                                                                                                                                                                                                                                                                                                 | see above | Quest Diagnostics Incorporated                 | Centers for Disease Control and Prevention Division of Viral Diseases, Pathogen Discovery | Peter W. Cook, Dakota Howard, Dhvani Batra, Ben L. Rambo-Martin, S. H. Rosenthal, A. Gerasimova, R. M. Kagan, B. Anderson, M. Hua, Y. Liu, L.E. Bernstein, K.E. Livingston, A. Perez, I. A. Shlyakhter, R. V. Rolando, R. Owen, P. Tanpaiboon, F. Lacbawan, Clinton R. Paden, Suxiang Tong, Duncan MacCannell                                                                                                                                                                                                                                                                                                                                                                                                                                                                                                                                                                                          |
| EPI_ISL_1261904, EPI_ISL_1261907, EPI_ISL_1261921, EPI_ISL_1261951, EPI_ISL_1262005, EPI_ISL_1262219, EPI_ISL_1262278, EPI_ISL_1262280, EPI_ISL_1262284, EPI_ISL_1262291, EPI_ISL_1262300, EPI_ISL_1262336, EPI_ISL_1262338, EPI_ISL_1262339, EPI_ISL_1262347, EPI_ISL_1262353, EPI_ISL_1262360, EPI_ISL_1262379, EPI_ISL_1262381, EPI_ISL_1262385, EPI_ISL_1262404, EPI_ISL_1262414                                                                                                                                                                                                                                                                                                                                                                                                                                                                                                                                                                                                                                                                                                                                                                                                                                                                                                                                                                                                                                                                                                                                                                                                                                                                                                                                                                                                                                                                                                                                                                                                                                                                                                                                                                                                                                                                                                                                                                                                                                                                                                                                                                                                                                                                                                                                                                                                                                                                                                                                | see above | Helix/Illumina                                 | Centers for Disease Control and Prevention Division of Viral Diseases, Pathogen Discovery | Peter W. Cook, Dakota Howard, Dhvani Batra, Ben L. Rambo-Martin, Eileen de Feo, Jan Antico, Christine Tran, Matthew Tolentino, Shannon Wickline, Kim Gietzen, Brad Sickler, Jingtiao Liu, Eric Allen, Phil Febbo, Summer Galloway, Nicole L. Washington, Simon White, Geraint Levan, Kelly Schiabor Barrett, Elizabeth Cirulli, Alexandre Bolze, Ary Ascencio, Charlotte Rivera-Garcia, Ryan Cho, Jason Nguyen, Sherry Wang, Jimmy Ramirez, Tyler Cassens, Efen Sandoval, Magnus Isaksson, William Lee, David Becker, Marc Laurent, James Lu, Clinton R. Paden, Suxiang Tong, Duncan MacCannell                                                                                                                                                                                                                                                                                                        |
| EPI_ISL_1263228, EPI_ISL_1263232, EPI_ISL_1263233, EPI_ISL_1263234, EPI_ISL_1263235                                                                                                                                                                                                                                                                                                                                                                                                                                                                                                                                                                                                                                                                                                                                                                                                                                                                                                                                                                                                                                                                                                                                                                                                                                                                                                                                                                                                                                                                                                                                                                                                                                                                                                                                                                                                                                                                                                                                                                                                                                                                                                                                                                                                                                                                                                                                                                                                                                                                                                                                                                                                                                                                                                                                                                                                                                 |           | Monterey County Public Health Laboratory       | Monterey County Public Health Laboratory                                                  | Monterey County Public Health Laboratory                                                                                                                                                                                                                                                                                                                                                                                                                                                                                                                                                                                                                                                                                                                                                                                                                                                               |
| EPI_ISL_1265918, EPI_ISL_1265924, EPI_ISL_1265930, EPI_ISL_1265954, EPI_ISL_1265963, EPI_ISL_1265966, EPI_ISL_1265979, EPI_ISL_1266106, EPI_ISL_1266107, EPI_ISL_1266205, EPI_ISL_1266216, EPI_ISL_1266667, EPI_ISL_1266697, EPI_ISL_1266734, EPI_ISL_1266862, EPI_ISL_1267283, EPI_ISL_1267342, EPI_ISL_1267351, EPI_ISL_1267390, EPI_ISL_1267391, EPI_ISL_1267411, EPI_ISL_1267422, EPI_ISL_1267430, EPI_ISL_1267432, EPI_ISL_1267434, EPI_ISL_1267445, EPI_ISL_1267479, EPI_ISL_1267481                                                                                                                                                                                                                                                                                                                                                                                                                                                                                                                                                                                                                                                                                                                                                                                                                                                                                                                                                                                                                                                                                                                                                                                                                                                                                                                                                                                                                                                                                                                                                                                                                                                                                                                                                                                                                                                                                                                                                                                                                                                                                                                                                                                                                                                                                                                                                                                                                          | see above | Quest Diagnostics Incorporated                 | Centers for Disease Control and Prevention Division of Viral Diseases, Pathogen Discovery | Peter W. Cook, Dakota Howard, Dhvani Batra, Ben L. Rambo-Martin, S. H. Rosenthal, A. Gerasimova, R. M. Kagan, B. Anderson, M. Hua, Y. Liu, L.E. Bernstein, K.E. Livingston, A. Perez, I. A. Shlyakhter, R. V. Rolando, R. Owen, P. Tanpaiboon, F. Lacbawan, Clinton R. Paden, Suxiang Tong, Duncan MacCannell                                                                                                                                                                                                                                                                                                                                                                                                                                                                                                                                                                                          |
| EPI_ISL_1267505, EPI_ISL_1267513, EPI_ISL_1267530, EPI_ISL_1267537, EPI_ISL_1267538, EPI_ISL_1267542, EPI_ISL_1267545, EPI_ISL_1267548, EPI_ISL_1267551, EPI_ISL_1267556, EPI_ISL_1267557, EPI_ISL_1267558, EPI_ISL_1267559, EPI_ISL_1267568, EPI_ISL_1267569, EPI_ISL_1267575, EPI_ISL_1267582, EPI_ISL_1267589, EPI_ISL_1267621, EPI_ISL_1267622, EPI_ISL_1267631, EPI_ISL_1267635, EPI_ISL_1267636, EPI_ISL_1267642, EPI_ISL_1267652, EPI_ISL_1267657, EPI_ISL_1267661, EPI_ISL_1267680, EPI_ISL_1267681, EPI_ISL_1267689, EPI_ISL_1267695, EPI_ISL_1267704, EPI_ISL_1267746, EPI_ISL_1267758, EPI_ISL_1267767, EPI_ISL_1267776, EPI_ISL_1267790, EPI_ISL_1267797, EPI_ISL_1267798, EPI_ISL_1267800, EPI_ISL_1267809, EPI_ISL_1267815, EPI_ISL_1267820, EPI_ISL_1267821, EPI_ISL_1267833, EPI_ISL_1267839, EPI_ISL_1267844, EPI_ISL_1267845, EPI_ISL_1267851, EPI_ISL_1267876, EPI_ISL_1267892, EPI_ISL_1267897, EPI_ISL_1267898, EPI_ISL_1267901, EPI_ISL_1267903, EPI_ISL_1267904, EPI_ISL_1267906, EPI_ISL_1267912, EPI_ISL_1267913, EPI_ISL_1267916, EPI_ISL_1267920, EPI_ISL_1267971, EPI_ISL_1267978, EPI_ISL_1267993, EPI_ISL_1268000, EPI_ISL_1268012, EPI_ISL_1268017, EPI_ISL_1268038, EPI_ISL_1268039, EPI_ISL_1268048, EPI_ISL_1268049, EPI_ISL_1268073, EPI_ISL_1268075, EPI_ISL_1268085, EPI_ISL_1268099, EPI_ISL_1268110, EPI_ISL_1268111, EPI_ISL_1268113, EPI_ISL_1268119, EPI_ISL_1268147, EPI_ISL_1268173, EPI_ISL_1268174, EPI_ISL_1268180, EPI_ISL_1268181, EPI_ISL_1268185, EPI_ISL_1268186, EPI_ISL_1268190, EPI_ISL_1268199, EPI_ISL_1268201, EPI_ISL_1268231, EPI_ISL_1268231, EPI_ISL_1268260, EPI_ISL_1268272, EPI_ISL_1268273, EPI_ISL_1268276, EPI_ISL_1268286, EPI_ISL_1268312, EPI_ISL_1268339, EPI_ISL_1268344, EPI_ISL_1268363, EPI_ISL_1268404, EPI_ISL_1268434, EPI_ISL_1268436, EPI_ISL_1268440, EPI_ISL_1268442, EPI_ISL_1268443, EPI_ISL_1268473, EPI_ISL_1268485, EPI_ISL_1268509, EPI_ISL_1268534, EPI_ISL_1268544, EPI_ISL_1268549, EPI_ISL_1268554, EPI_ISL_1268575, EPI_ISL_1268599, EPI_ISL_1268603, EPI_ISL_1268604, EPI_ISL_1268606, EPI_ISL_1268634, EPI_ISL_1268640, EPI_ISL_1268744, EPI_ISL_1268748, EPI_ISL_1268842, EPI_ISL_1268870, EPI_ISL_1268897, EPI_ISL_1268901, EPI_ISL_1268909, EPI_ISL_1268912, EPI_ISL_1268913, EPI_ISL_1268941, EPI_ISL_1269148, EPI_ISL_1269152, EPI_ISL_1269156, EPI_ISL_1269157, EPI_ISL_1269158, EPI_ISL_1269159, EPI_ISL_1269160, EPI_ISL_1269161, EPI_ISL_1269162, EPI_ISL_1269163, EPI_ISL_1269164, EPI_ISL_1269165, EPI_ISL_1269166, EPI_ISL_1269167, EPI_ISL_1269168, EPI_ISL_1269169, EPI_ISL_1269170, EPI_ISL_1269171, EPI_ISL_1269172, EPI_ISL_1269173, EPI_ISL_1269174, EPI_ISL_1269175, EPI_ISL_1269176, EPI_ISL_1269177, EPI_ISL_1269178, EPI_ISL_1269179, EPI_ISL_1269180, EPI_ISL_1269181, EPI_ISL_1269182, EPI_ISL_1269183, EPI_ISL_1269184, EPI_ISL_1269185, EPI_ISL_1269186, EPI_ISL_1269187, EPI_ISL_1269188 | see above | Helix/Illumina                                 | Centers for Disease Control and Prevention Division of Viral Diseases, Pathogen Discovery | Peter W. Cook, Dakota Howard, Dhvani Batra, Ben L. Rambo-Martin, Eileen de Feo, Jan Antico, Christine Tran, Matthew Tolentino, Shannon Wickline, Kim Gietzen, Brad Sickler, Jingtiao Liu, Eric Allen, Phil Febbo, Summer Galloway, Nicole L. Washington, Simon White, Geraint Levan, Kelly Schiabor Barrett, Elizabeth Cirulli, Alexandre Bolze, Ary Ascencio, Charlotte Rivera-Garcia, Ryan Cho, Jason Nguyen, Sherry Wang, Jimmy Ramirez, Tyler Cassens, Efen Sandoval, Magnus Isaksson, William Lee, David Becker, Marc Laurent, James Lu, Clinton R. Paden, Suxiang Tong, Duncan MacCannell                                                                                                                                                                                                                                                                                                        |
| EPI_ISL_1272873, EPI_ISL_1272874, EPI_ISL_1272875, EPI_ISL_1272876, EPI_ISL_1272877, EPI_ISL_1272878, EPI_ISL_1272879, EPI_ISL_1272891, EPI_ISL_1272892, EPI_ISL_1272893, EPI_ISL_1272894, EPI_ISL_1272895                                                                                                                                                                                                                                                                                                                                                                                                                                                                                                                                                                                                                                                                                                                                                                                                                                                                                                                                                                                                                                                                                                                                                                                                                                                                                                                                                                                                                                                                                                                                                                                                                                                                                                                                                                                                                                                                                                                                                                                                                                                                                                                                                                                                                                                                                                                                                                                                                                                                                                                                                                                                                                                                                                          | see above | CA-Los Angeles County Public Health Laboratory | Centers for Disease Control and Prevention Division of Viral Diseases, Pathogen Discovery | Krista Queen, Yan Li, Ying Tao, Jing Zhang, Anna Uehara, Anna Montmayeur, Clinton R. Paden, Kristen Knipe, Matthew Schmerer, Shoshona Le, Katie Dillon, Peter W. Cook, Rachel Marine, Mili Sheth, Jasmine Padilla, Sarah Nobles, Mark Burroughs, Lori Rowe, Haibin Wang, Ben L. Rambo-Martin, Kristine Lacek, Sam Shepard, Dhvani Batra, Suxiang Tong, Justin Lee                                                                                                                                                                                                                                                                                                                                                                                                                                                                                                                                      |
| EPI_ISL_1283377, EPI_ISL_1283443, EPI_ISL_1283456, EPI_ISL_1283639, EPI_ISL_1283692, EPI_ISL_1283707, EPI_ISL_1283742, EPI_ISL_1283831, EPI_ISL_1283862, EPI_ISL_1283864, EPI_ISL_1283882, EPI_ISL_1283906, EPI_ISL_1283935, EPI_ISL_1283952, EPI_ISL_1283990, EPI_ISL_1284006, EPI_ISL_1284264, EPI_ISL_1284385, EPI_ISL_1284410                                                                                                                                                                                                                                                                                                                                                                                                                                                                                                                                                                                                                                                                                                                                                                                                                                                                                                                                                                                                                                                                                                                                                                                                                                                                                                                                                                                                                                                                                                                                                                                                                                                                                                                                                                                                                                                                                                                                                                                                                                                                                                                                                                                                                                                                                                                                                                                                                                                                                                                                                                                   | see above | Helix/Illumina                                 | Centers for Disease Control and Prevention Division of Viral Diseases, Pathogen Discovery | Peter W. Cook, Dakota Howard, Dhvani Batra, Ben L. Rambo-Martin, Eileen de Feo, Jan Antico, Christine Tran, Matthew Tolentino, Shannon Wickline, Kim Gietzen, Brad Sickler, Jingtiao Liu, Eric Allen, Phil Febbo, Summer Galloway, Nicole L. Washington, Simon White, Geraint Levan, Kelly Schiabor Barrett, Elizabeth Cirulli, Alexandre Bolze, Ary Ascencio, Charlotte Rivera-Garcia, Ryan Cho, Jason Nguyen, Sherry Wang, Jimmy Ramirez, Tyler Cassens, Efen Sandoval, Magnus Isaksson, William Lee, David Becker, Marc Laurent, James Lu, Clinton R. Paden, Suxiang Tong, Duncan MacCannell                                                                                                                                                                                                                                                                                                        |
| EPI_ISL_1291002, EPI_ISL_1291015, EPI_ISL_1291028, EPI_ISL_1291032, EPI_ISL_1291091, EPI_ISL_1291092, EPI_ISL_1291094, EPI_ISL_1291095, EPI_ISL_1291099, EPI_ISL_1291100, EPI_ISL_1291105, EPI_ISL_1291106, EPI_ISL_1291110, EPI_ISL_1291114, EPI_ISL_1291115, EPI_ISL_1291116, EPI_ISL_1291118, EPI_ISL_1291121, EPI_ISL_1291123, EPI_ISL_1291125, EPI_ISL_1291127, EPI_ISL_1291128, EPI_ISL_1291129, EPI_ISL_1291130, EPI_ISL_1291131, EPI_ISL_1291132, EPI_ISL_1291134, EPI_ISL_1291135, EPI_ISL_1291137, EPI_ISL_1291138, EPI_ISL_1291140, EPI_ISL_1291142, EPI_ISL_1291143, EPI_ISL_1291144, EPI_ISL_1291145, EPI_ISL_1291146, EPI_ISL_1291147, EPI_ISL_1291149, EPI_ISL_1291150, EPI_ISL_1291151, EPI_ISL_1291152, EPI_ISL_1291153, EPI_ISL_1291154, EPI_ISL_1291155, EPI_ISL_1291156, EPI_ISL_1291159, EPI_ISL_1291160, EPI_ISL_1291161, EPI_ISL_1291162, EPI_ISL_1291163, EPI_ISL_1291164, EPI_ISL_1291165, EPI_ISL_1291166, EPI_ISL_1291170, EPI_ISL_1291171, EPI_ISL_1291172, EPI_ISL_1291173, EPI_ISL_1291179, EPI_ISL_1291180, EPI_ISL_1291182, EPI_ISL_1291183, EPI_ISL_1291187, EPI_ISL_1291188                                                                                                                                                                                                                                                                                                                                                                                                                                                                                                                                                                                                                                                                                                                                                                                                                                                                                                                                                                                                                                                                                                                                                                                                                                                                                                                                                                                                                                                                                                                                                                                                                                                                                                                                                                                                       | see above | Quest Diagnostics Incorporated                 | Centers for Disease Control and Prevention Division of Viral Diseases, Pathogen Discovery | Peter W. Cook, Dakota Howard, Dhvani Batra, Ben L. Rambo-Martin, S. H. Rosenthal, A. Gerasimova, R. M. Kagan, B. Anderson, M. Hua, Y. Liu, L.E. Bernstein, K.E. Livingston, A. Perez, I. A. Shlyakhter, R. V. Rolando, R. Owen, P. Tanpaiboon, F. Lacbawan, Clinton R. Paden, Suxiang Tong, Duncan MacCannell                                                                                                                                                                                                                                                                                                                                                                                                                                                                                                                                                                                          |
| EPI_ISL_1291297, EPI_ISL_1291298                                                                                                                                                                                                                                                                                                                                                                                                                                                                                                                                                                                                                                                                                                                                                                                                                                                                                                                                                                                                                                                                                                                                                                                                                                                                                                                                                                                                                                                                                                                                                                                                                                                                                                                                                                                                                                                                                                                                                                                                                                                                                                                                                                                                                                                                                                                                                                                                                                                                                                                                                                                                                                                                                                                                                                                                                                                                                    |           | Laboratory Corporation of America              | Centers for Disease Control and Prevention Division of Viral Diseases, Pathogen Discovery | Peter W. Cook, Dakota Howard, Dhvani Batra, Ben L. Rambo-Martin, Minoo Agarwal, Eyad Almasri Debbie Boles, Ayla Burns, Nuthawin Charoensri, Oren Cohen, Susan Countryman, Mary Ann Cristobal, Bobbi Croy, Suzanne Dale, Hrushikesh Deshmukh, Amanda Douglas, Vincent Drouillon, Marcia Eisenberg, Howard Engler, Rama Ghatti, Prashant Gupta, Susan Hicks, Jake Humphrey, Lax Iyer, Manoj Jain, Mohan Kolli, Brian Krueger, Tim Kuphal, Stanley Letovsky, Michael Levandoski, Craig Lukasik, Jonathan Meltzer, Brian Norvell, Mindy Nye, Scott Parker, Christos Protopoulos, John Pruitt, Steven Ragan, Scott Ryan, Mike Sapeta, Jana Schroth, Suresh Babu Selvaraju, Goran Stevovic, Amanda Suchanek, Andrea Throop, Lyndon Tilson, Thomas Urban, Joe Voshell, Kimberly Wagner, Jonathan Williams, Mary Williamson, Qian Zeng, Tricia Zwiefelhofer, Clinton R. Paden, Suxiang Tong, Duncan MacCannell |
| EPI_ISL_1291400, EPI_ISL_1291420, EPI_ISL_1291433, EPI_ISL_1291438, EPI_ISL_1291451, EPI_ISL_1291480, EPI_ISL_1291482, EPI_ISL_1291541                                                                                                                                                                                                                                                                                                                                                                                                                                                                                                                                                                                                                                                                                                                                                                                                                                                                                                                                                                                                                                                                                                                                                                                                                                                                                                                                                                                                                                                                                                                                                                                                                                                                                                                                                                                                                                                                                                                                                                                                                                                                                                                                                                                                                                                                                                                                                                                                                                                                                                                                                                                                                                                                                                                                                                              |           | Quest Diagnostics Incorporated                 | Centers for Disease Control and Prevention Division of Viral Diseases, Pathogen Discovery | Peter W. Cook, Dakota Howard, Dhvani Batra, Ben L. Rambo-Martin, S. H. Rosenthal, A. Gerasimova, R. M. Kagan, B. Anderson, M. Hua, Y. Liu, L.E. Bernstein, K.E. Livingston, A. Perez, I. A. Shlyakhter, R. V. Rolando, R. Owen, P. Tanpaiboon, F. Lacbawan, Clinton R. Paden, Suxiang Tong, Duncan MacCannell                                                                                                                                                                                                                                                                                                                                                                                                                                                                                                                                                                                          |
| EPI_ISL_1293334, EPI_ISL_1293335, EPI_ISL_1293340                                                                                                                                                                                                                                                                                                                                                                                                                                                                                                                                                                                                                                                                                                                                                                                                                                                                                                                                                                                                                                                                                                                                                                                                                                                                                                                                                                                                                                                                                                                                                                                                                                                                                                                                                                                                                                                                                                                                                                                                                                                                                                                                                                                                                                                                                                                                                                                                                                                                                                                                                                                                                                                                                                                                                                                                                                                                   |           | Quest Diagnostics Incorporated                 | Respiratory Viruses Branch, Centers for Disease Control and Prevention                    | Peter W. Cook, Dakota Howard, Dhvani Batra, Ben L. Rambo-Martin, S. H. Rosenthal, A. Gerasimova, R. M. Kagan, B. Anderson, M. Hua, Y. Liu, L.E. Bernstein, K.E. Livingston, A. Perez, I. A. Shlyakhter, R. V. Rolando, R. Owen, P. Tanpaiboon, F. Lacbawan, Clinton R. Paden, Suxiang Tong, Duncan MacCannell                                                                                                                                                                                                                                                                                                                                                                                                                                                                                                                                                                                          |
| EPI_ISL_1295646, EPI_ISL_1295647, EPI_ISL_1295648, EPI_ISL_1295649, EPI_ISL_1295650, EPI_ISL_1295651, EPI_ISL_1295652, EPI_ISL_1295653, EPI_ISL_1295654, EPI_ISL_1295655, EPI_ISL_1295656, EPI_ISL_1295657, EPI_ISL_1295658, EPI_ISL_1295659, EPI_ISL_1295660, EPI_ISL_1295661, EPI_ISL_1295662, EPI_ISL_1295663, EPI_ISL_1295664, EPI_ISL_1295665, EPI_ISL_1295666, EPI_ISL_1295667, EPI_ISL_1295668, EPI_ISL_1295669, EPI_ISL_1295670, EPI_ISL_1295671, EPI_ISL_1295672, EPI_ISL_1295673, EPI_ISL_1295674, EPI_ISL_1295675, EPI_ISL_1295676, EPI_ISL_1295677, EPI_ISL_1295678, EPI_ISL_1295679, EPI_ISL_1295680, EPI_ISL_1295681, EPI_ISL_1295682, EPI_ISL_1295683, EPI_ISL_1295684, EPI_ISL_1295685, EPI_ISL_1295686, EPI_ISL_1295687, EPI_ISL_1295688, EPI_ISL_1295689, EPI_ISL_1295690, EPI_ISL_1295691, EPI_ISL_1295692, EPI_ISL_1295693, EPI_ISL_1295694, EPI_ISL_1295695, EPI_ISL_1295696, EPI_ISL_1295697, EPI_ISL_1295698, EPI_ISL_1295699, EPI_ISL_1295700, EPI_ISL_1295701, EPI_ISL_1295702, EPI_ISL_1295703, EPI_ISL_1295704, EPI_ISL_1295705, EPI_ISL_1295706, EPI_ISL_1295707, EPI_ISL_1295708, EPI_ISL_1295709, EPI_ISL_1295710, EPI_ISL_1295711, EPI_ISL_1295712, EPI_ISL_1295713, EPI_ISL_1295714, EPI_ISL_1295715, EPI_ISL_1295716, EPI_ISL_1295717, EPI_ISL_1295718, EPI_ISL_1295719, EPI_ISL_1295720, EPI_ISL_1295721, EPI_ISL_1295722, EPI_ISL_1295723, EPI_ISL_1295724, EPI_ISL_1295725, EPI_ISL_1295726, EPI_ISL_1295727, EPI_ISL_1295728, EPI_ISL_1295729, EPI_ISL_1295730, EPI_ISL_1295731, EPI_ISL_1295732, EPI_ISL_1295733, EPI_ISL_1295734, EPI_ISL_1295735, EPI_ISL_1295736, EPI_ISL_1295737, EPI_ISL_1295738, EPI_ISL_1295739, EPI_ISL_1295740, EPI_ISL_1295741, EPI_ISL_1295742, EPI_ISL_1295743, EPI_ISL_1295744, EPI_ISL_1295745, EPI_ISL_1295746, EPI_ISL_1295747, EPI_ISL_1295748, EPI_ISL_1295749, EPI_ISL_1295750, EPI_ISL_1295751, EPI_ISL_1295752, EPI_ISL_1295753, EPI_ISL_1295754, EPI_ISL_1295755, EPI_ISL_1295756, EPI_ISL_1295757, EPI_ISL_1295758, EPI_ISL_1295759, EPI_ISL_1295761, EPI_ISL_1295763, EPI_ISL_1295764, EPI_ISL_1295766, EPI_ISL_1295768, EPI_ISL_1295769, EPI_ISL_1295771, EPI_ISL_1295772, EPI_ISL_1295773, EPI_ISL_1295774, EPI_ISL_1295775, EPI_ISL_1295776, EPI_ISL_1295777, EPI_ISL_1295778, EPI_ISL_1295779, EPI_ISL_1295780, EPI_ISL_1295781, EPI_ISL_1295782, EPI_ISL_1295783, EPI_ISL_1295784, EPI_ISL_1295786, EPI_ISL_1295787, EPI_ISL_1295789, EPI_ISL_1295790, EPI_ISL_1295791, EPI_ISL_1295792, EPI_ISL_1295793, EPI_ISL_1295794                                                                                                                                                                                                                                                                                                                                                                                                        |           |                                                |                                                                                           |                                                                                                                                                                                                                                                                                                                                                                                                                                                                                                                                                                                                                                                                                                                                                                                                                                                                                                        |

|                                                                                                                                                                                                                                                                                                                                                                                                                                                                                                                                                                                                                                                                                                                                                                                                                                                                                                                                                                                                                                                                                                                                                                                                                                                                                                                                                                                                                                                                                                                                                                                                                                                                                                                                                                     |                                                  |                                                                                           |                                                                                                                                                                                                                                                                                                                                                                                                                                                                                                                                                                                                                                                                                                                                                                                                                                                                                                      |
|---------------------------------------------------------------------------------------------------------------------------------------------------------------------------------------------------------------------------------------------------------------------------------------------------------------------------------------------------------------------------------------------------------------------------------------------------------------------------------------------------------------------------------------------------------------------------------------------------------------------------------------------------------------------------------------------------------------------------------------------------------------------------------------------------------------------------------------------------------------------------------------------------------------------------------------------------------------------------------------------------------------------------------------------------------------------------------------------------------------------------------------------------------------------------------------------------------------------------------------------------------------------------------------------------------------------------------------------------------------------------------------------------------------------------------------------------------------------------------------------------------------------------------------------------------------------------------------------------------------------------------------------------------------------------------------------------------------------------------------------------------------------|--------------------------------------------------|-------------------------------------------------------------------------------------------|------------------------------------------------------------------------------------------------------------------------------------------------------------------------------------------------------------------------------------------------------------------------------------------------------------------------------------------------------------------------------------------------------------------------------------------------------------------------------------------------------------------------------------------------------------------------------------------------------------------------------------------------------------------------------------------------------------------------------------------------------------------------------------------------------------------------------------------------------------------------------------------------------|
| see above                                                                                                                                                                                                                                                                                                                                                                                                                                                                                                                                                                                                                                                                                                                                                                                                                                                                                                                                                                                                                                                                                                                                                                                                                                                                                                                                                                                                                                                                                                                                                                                                                                                                                                                                                           | Sharp HealthCare Laboratory                      | Andersen lab at Scripps Research                                                          | SEARCH Alliance San Diego with Aaron Harding, Jacquelyn Berumen, Cathy Woerle, Liam McGinnis, Art Mendoza, Omid Bakhtar                                                                                                                                                                                                                                                                                                                                                                                                                                                                                                                                                                                                                                                                                                                                                                              |
| EPI_ISL_1295798, EPI_ISL_1295799, EPI_ISL_1295802, EPI_ISL_1295803, EPI_ISL_1295807, EPI_ISL_1295809, EPI_ISL_1295811, EPI_ISL_1295812                                                                                                                                                                                                                                                                                                                                                                                                                                                                                                                                                                                                                                                                                                                                                                                                                                                                                                                                                                                                                                                                                                                                                                                                                                                                                                                                                                                                                                                                                                                                                                                                                              | Rady Children's Hospital - San Diego             | Andersen lab at Scripps Research                                                          | SEARCH Alliance San Diego with Nanda Radamchar, David Dimmock, Linda Luo, Christina Clarke, Kathryn Bouic, Teresa Mueller, Denise Malicki                                                                                                                                                                                                                                                                                                                                                                                                                                                                                                                                                                                                                                                                                                                                                            |
| EPI_ISL_1295815, EPI_ISL_1295816, EPI_ISL_1295817                                                                                                                                                                                                                                                                                                                                                                                                                                                                                                                                                                                                                                                                                                                                                                                                                                                                                                                                                                                                                                                                                                                                                                                                                                                                                                                                                                                                                                                                                                                                                                                                                                                                                                                   | San Diego County Public Health Laboratory        | Andersen lab at Scripps Research                                                          | SEARCH Alliance San Diego with Tracy Basler, Jovan Shephard, Brett Austin                                                                                                                                                                                                                                                                                                                                                                                                                                                                                                                                                                                                                                                                                                                                                                                                                            |
| EPI_ISL_1295820, EPI_ISL_1295855, EPI_ISL_1295857, EPI_ISL_1295858, EPI_ISL_1295859, EPI_ISL_1295860, EPI_ISL_1295868                                                                                                                                                                                                                                                                                                                                                                                                                                                                                                                                                                                                                                                                                                                                                                                                                                                                                                                                                                                                                                                                                                                                                                                                                                                                                                                                                                                                                                                                                                                                                                                                                                               | Sharp HealthCare Laboratory                      | Andersen lab at Scripps Research                                                          | SEARCH Alliance San Diego with Aaron Harding, Jacquelyn Berumen, Cathy Woerle, Liam McGinnis, Art Mendoza, Omid Bakhtar                                                                                                                                                                                                                                                                                                                                                                                                                                                                                                                                                                                                                                                                                                                                                                              |
| EPI_ISL_1297683, EPI_ISL_1297688, EPI_ISL_1297689, EPI_ISL_1297691, EPI_ISL_1297701, EPI_ISL_1297708, EPI_ISL_1297719, EPI_ISL_1297735, EPI_ISL_1297737, EPI_ISL_1297738, EPI_ISL_1297741, EPI_ISL_1297744, EPI_ISL_1297745, EPI_ISL_1297747, EPI_ISL_1297754, EPI_ISL_1297757, EPI_ISL_1297758, EPI_ISL_1297760                                                                                                                                                                                                                                                                                                                                                                                                                                                                                                                                                                                                                                                                                                                                                                                                                                                                                                                                                                                                                                                                                                                                                                                                                                                                                                                                                                                                                                                    |                                                  |                                                                                           |                                                                                                                                                                                                                                                                                                                                                                                                                                                                                                                                                                                                                                                                                                                                                                                                                                                                                                      |
| see above                                                                                                                                                                                                                                                                                                                                                                                                                                                                                                                                                                                                                                                                                                                                                                                                                                                                                                                                                                                                                                                                                                                                                                                                                                                                                                                                                                                                                                                                                                                                                                                                                                                                                                                                                           | Quest Diagnostics Incorporated                   | Centers for Disease Control and Prevention Division of Viral Diseases, Pathogen Discovery | Peter W. Cook, Dakota Howard, Dhvani Batra, Ben L. Rambo-Martin, S. H. Rosenthal, A. Gerasimova, R. M. Kagan, B. Anderson, M. Hua, Y. Liu, L.E. Bernstein, K.E. Livingston, A. Perez, I. A. Shlyakhter, R. V. Rolando, R. Owen, P. Tanpaiboon, F. Lacbawan, Clinton R. Paden, Suxiang Tong, Duncan MacCannell                                                                                                                                                                                                                                                                                                                                                                                                                                                                                                                                                                                        |
| EPI_ISL_1297927, EPI_ISL_1297941, EPI_ISL_1297951, EPI_ISL_1297955, EPI_ISL_1297959, EPI_ISL_1297975, EPI_ISL_1298016, EPI_ISL_1298067, EPI_ISL_1298069, EPI_ISL_1298074, EPI_ISL_1298077, EPI_ISL_1298080, EPI_ISL_1298084, EPI_ISL_1298098, EPI_ISL_1298111, EPI_ISL_1298114, EPI_ISL_1298122, EPI_ISL_1298168, EPI_ISL_1298172, EPI_ISL_1298206                                                                                                                                                                                                                                                                                                                                                                                                                                                                                                                                                                                                                                                                                                                                                                                                                                                                                                                                                                                                                                                                                                                                                                                                                                                                                                                                                                                                                  |                                                  |                                                                                           |                                                                                                                                                                                                                                                                                                                                                                                                                                                                                                                                                                                                                                                                                                                                                                                                                                                                                                      |
| see above                                                                                                                                                                                                                                                                                                                                                                                                                                                                                                                                                                                                                                                                                                                                                                                                                                                                                                                                                                                                                                                                                                                                                                                                                                                                                                                                                                                                                                                                                                                                                                                                                                                                                                                                                           | Helix/Illumina                                   | Centers for Disease Control and Prevention Division of Viral Diseases, Pathogen Discovery | Peter W. Cook, Dakota Howard, Dhvani Batra, Ben L. Rambo-Martin, Eileen de Feo, Jan Antico, Christine Tran, Matthew Tolentino, Shannon Wickline, Kim Gietzen, Brad Sickler, Jingtao Liu, Eric Allen, Phil Febbo, Summer Galloway, Nicole L. Washington, Simon White, Geraint Levan, Kelly Schiabor Barrett, Elizabeth Cirulli, Alexandre Bolze, Ary Ascencio, Charlotte Rivera-Garcia, Ryan Cho, Jason Nguyen, Sherry Wang, Jimmy Ramirez, Tyler Cassens, Eren Sandoval, Magnus Isaksson, William Lee, David Becker, Marc Laurent, James Lu, Clinton R. Paden, Suxiang Tong, Duncan MacCannell                                                                                                                                                                                                                                                                                                       |
| EPI_ISL_1298235                                                                                                                                                                                                                                                                                                                                                                                                                                                                                                                                                                                                                                                                                                                                                                                                                                                                                                                                                                                                                                                                                                                                                                                                                                                                                                                                                                                                                                                                                                                                                                                                                                                                                                                                                     | Quest Diagnostics Incorporated                   | Centers for Disease Control and Prevention Division of Viral Diseases, Pathogen Discovery | Peter W. Cook, Dakota Howard, Dhvani Batra, Ben L. Rambo-Martin, S. H. Rosenthal, A. Gerasimova, R. M. Kagan, B. Anderson, M. Hua, Y. Liu, L.E. Bernstein, K.E. Livingston, A. Perez, I. A. Shlyakhter, R. V. Rolando, R. Owen, P. Tanpaiboon, F. Lacbawan, Clinton R. Paden, Suxiang Tong, Duncan MacCannell                                                                                                                                                                                                                                                                                                                                                                                                                                                                                                                                                                                        |
| EPI_ISL_1298296                                                                                                                                                                                                                                                                                                                                                                                                                                                                                                                                                                                                                                                                                                                                                                                                                                                                                                                                                                                                                                                                                                                                                                                                                                                                                                                                                                                                                                                                                                                                                                                                                                                                                                                                                     | Laboratory Corporation of America                | Centers for Disease Control and Prevention Division of Viral Diseases, Pathogen Discovery | Peter W. Cook, Dakota Howard, Dhvani Batra, Ben L. Rambo-Martin, Mino Agarwal, Eyad Almasri, Debbie Boles, Ayla Burns, Nuthawin Charoensri, Oren Cohen, Susan Countryman, Mary Ann Cristobal, Bobbi Croy, Suzanne Dale, Hrushikesh Deshmukh, Amanda Douglas, Vincent Drouillon, Marcia Eisenberg, Howard Engler, Rama Ghatti, Prashant Gupta, Susan Hicks, Jake Humphrey, Lax Iyer, Manoj Jain, Mohan Koli, Brian Krueger, Tim Kuphal, Stanley Letovsky, Michael Levandoski, Craig Lukaski, Jonathan Meltzer, Brian Norvell, Mindy Nye, Scott Parker, Christos Petropoulos, John Pruitt, Steven Ragan, Scott Ryan, Mike Sapeta, Jana Schroth, Suresh Babu Selvaraju, Goran Stevovic, Amanda Suchanek, Andrea Throop, Lyndon Tison, Thomas Urban, Joe Voshell, Kimberly Wagner, Jonathan Williams, Mary Williamson, Qian Zeng, Tricia Zwiefelhofer, Clinton R. Paden, Suxiang Tong, Duncan MacCannell |
| EPI_ISL_1303405                                                                                                                                                                                                                                                                                                                                                                                                                                                                                                                                                                                                                                                                                                                                                                                                                                                                                                                                                                                                                                                                                                                                                                                                                                                                                                                                                                                                                                                                                                                                                                                                                                                                                                                                                     | Pomona Valley Hospital Medical Center            | Los Angeles County PHL                                                                    | P. Hemarajata et al.                                                                                                                                                                                                                                                                                                                                                                                                                                                                                                                                                                                                                                                                                                                                                                                                                                                                                 |
| EPI_ISL_1303414                                                                                                                                                                                                                                                                                                                                                                                                                                                                                                                                                                                                                                                                                                                                                                                                                                                                                                                                                                                                                                                                                                                                                                                                                                                                                                                                                                                                                                                                                                                                                                                                                                                                                                                                                     | Martin Luther King Jr. Community Hospital        | Los Angeles County PHL                                                                    | P. Hemarajata et al.                                                                                                                                                                                                                                                                                                                                                                                                                                                                                                                                                                                                                                                                                                                                                                                                                                                                                 |
| EPI_ISL_1303416, EPI_ISL_1303417, EPI_ISL_1303418, EPI_ISL_1303419, EPI_ISL_1303421, EPI_ISL_1303422                                                                                                                                                                                                                                                                                                                                                                                                                                                                                                                                                                                                                                                                                                                                                                                                                                                                                                                                                                                                                                                                                                                                                                                                                                                                                                                                                                                                                                                                                                                                                                                                                                                                | MD Laboratories                                  | Los Angeles County PHL                                                                    | P. Hemarajata et al.                                                                                                                                                                                                                                                                                                                                                                                                                                                                                                                                                                                                                                                                                                                                                                                                                                                                                 |
| EPI_ISL_1303425                                                                                                                                                                                                                                                                                                                                                                                                                                                                                                                                                                                                                                                                                                                                                                                                                                                                                                                                                                                                                                                                                                                                                                                                                                                                                                                                                                                                                                                                                                                                                                                                                                                                                                                                                     | USC Clinical Lab                                 | Los Angeles County PHL                                                                    | P. Hemarajata et al.                                                                                                                                                                                                                                                                                                                                                                                                                                                                                                                                                                                                                                                                                                                                                                                                                                                                                 |
| EPI_ISL_1303433, EPI_ISL_1303434, EPI_ISL_1303437                                                                                                                                                                                                                                                                                                                                                                                                                                                                                                                                                                                                                                                                                                                                                                                                                                                                                                                                                                                                                                                                                                                                                                                                                                                                                                                                                                                                                                                                                                                                                                                                                                                                                                                   | UCLA Clinical Micro Lab                          | Los Angeles County PHL                                                                    | P. Hemarajata et al.                                                                                                                                                                                                                                                                                                                                                                                                                                                                                                                                                                                                                                                                                                                                                                                                                                                                                 |
| EPI_ISL_1303438, EPI_ISL_1303445, EPI_ISL_1303446                                                                                                                                                                                                                                                                                                                                                                                                                                                                                                                                                                                                                                                                                                                                                                                                                                                                                                                                                                                                                                                                                                                                                                                                                                                                                                                                                                                                                                                                                                                                                                                                                                                                                                                   | USC Clinical Lab                                 | Los Angeles County PHL                                                                    | P. Hemarajata et al.                                                                                                                                                                                                                                                                                                                                                                                                                                                                                                                                                                                                                                                                                                                                                                                                                                                                                 |
| EPI_ISL_1303452, EPI_ISL_1303453, EPI_ISL_1303454, EPI_ISL_1303456, EPI_ISL_1303457, EPI_ISL_1303459, EPI_ISL_1303460, EPI_ISL_1303461                                                                                                                                                                                                                                                                                                                                                                                                                                                                                                                                                                                                                                                                                                                                                                                                                                                                                                                                                                                                                                                                                                                                                                                                                                                                                                                                                                                                                                                                                                                                                                                                                              | UCLA Clinical Micro Lab                          | Los Angeles County PHL                                                                    | P. Hemarajata et al.                                                                                                                                                                                                                                                                                                                                                                                                                                                                                                                                                                                                                                                                                                                                                                                                                                                                                 |
| EPI_ISL_1303463, EPI_ISL_1303464, EPI_ISL_1303466, EPI_ISL_1303469, EPI_ISL_1303470                                                                                                                                                                                                                                                                                                                                                                                                                                                                                                                                                                                                                                                                                                                                                                                                                                                                                                                                                                                                                                                                                                                                                                                                                                                                                                                                                                                                                                                                                                                                                                                                                                                                                 | USC Clinical Lab                                 | Los Angeles County PHL                                                                    | P. Hemarajata et al.                                                                                                                                                                                                                                                                                                                                                                                                                                                                                                                                                                                                                                                                                                                                                                                                                                                                                 |
| EPI_ISL_1303471                                                                                                                                                                                                                                                                                                                                                                                                                                                                                                                                                                                                                                                                                                                                                                                                                                                                                                                                                                                                                                                                                                                                                                                                                                                                                                                                                                                                                                                                                                                                                                                                                                                                                                                                                     | Henry Mayo Newhall Hospital                      | Los Angeles County PHL                                                                    | P. Hemarajata et al.                                                                                                                                                                                                                                                                                                                                                                                                                                                                                                                                                                                                                                                                                                                                                                                                                                                                                 |
| EPI_ISL_1303472                                                                                                                                                                                                                                                                                                                                                                                                                                                                                                                                                                                                                                                                                                                                                                                                                                                                                                                                                                                                                                                                                                                                                                                                                                                                                                                                                                                                                                                                                                                                                                                                                                                                                                                                                     | Pomona Valley Hospital Medical Center            | Los Angeles County PHL                                                                    | P. Hemarajata et al.                                                                                                                                                                                                                                                                                                                                                                                                                                                                                                                                                                                                                                                                                                                                                                                                                                                                                 |
| EPI_ISL_1303474, EPI_ISL_1303476                                                                                                                                                                                                                                                                                                                                                                                                                                                                                                                                                                                                                                                                                                                                                                                                                                                                                                                                                                                                                                                                                                                                                                                                                                                                                                                                                                                                                                                                                                                                                                                                                                                                                                                                    | Flow Diagnostics Lab                             | Los Angeles County PHL                                                                    | P. Hemarajata et al.                                                                                                                                                                                                                                                                                                                                                                                                                                                                                                                                                                                                                                                                                                                                                                                                                                                                                 |
| EPI_ISL_1303480                                                                                                                                                                                                                                                                                                                                                                                                                                                                                                                                                                                                                                                                                                                                                                                                                                                                                                                                                                                                                                                                                                                                                                                                                                                                                                                                                                                                                                                                                                                                                                                                                                                                                                                                                     | USC Clinical Lab                                 | Los Angeles County PHL                                                                    | P. Hemarajata et al.                                                                                                                                                                                                                                                                                                                                                                                                                                                                                                                                                                                                                                                                                                                                                                                                                                                                                 |
| EPI_ISL_1303488                                                                                                                                                                                                                                                                                                                                                                                                                                                                                                                                                                                                                                                                                                                                                                                                                                                                                                                                                                                                                                                                                                                                                                                                                                                                                                                                                                                                                                                                                                                                                                                                                                                                                                                                                     | Flow Diagnostics Lab                             | Los Angeles County PHL                                                                    | P. Hemarajata et al.                                                                                                                                                                                                                                                                                                                                                                                                                                                                                                                                                                                                                                                                                                                                                                                                                                                                                 |
| EPI_ISL_1303491, EPI_ISL_1303495                                                                                                                                                                                                                                                                                                                                                                                                                                                                                                                                                                                                                                                                                                                                                                                                                                                                                                                                                                                                                                                                                                                                                                                                                                                                                                                                                                                                                                                                                                                                                                                                                                                                                                                                    | USC Clinical Lab                                 | Los Angeles County PHL                                                                    | P. Hemarajata et al.                                                                                                                                                                                                                                                                                                                                                                                                                                                                                                                                                                                                                                                                                                                                                                                                                                                                                 |
| EPI_ISL_1314735                                                                                                                                                                                                                                                                                                                                                                                                                                                                                                                                                                                                                                                                                                                                                                                                                                                                                                                                                                                                                                                                                                                                                                                                                                                                                                                                                                                                                                                                                                                                                                                                                                                                                                                                                     | Quest Diagnostics Incorporated                   | Centers for Disease Control and Prevention Division of Viral Diseases, Pathogen Discovery | Peter W. Cook, Dakota Howard, Dhvani Batra, Ben L. Rambo-Martin, S. H. Rosenthal, A. Gerasimova, R. M. Kagan, B. Anderson, M. Hua, Y. Liu, L.E. Bernstein, K.E. Livingston, A. Perez, I. A. Shlyakhter, R. V. Rolando, R. Owen, P. Tanpaiboon, F. Lacbawan, Clinton R. Paden, Suxiang Tong, Duncan MacCannell                                                                                                                                                                                                                                                                                                                                                                                                                                                                                                                                                                                        |
| EPI_ISL_1315073                                                                                                                                                                                                                                                                                                                                                                                                                                                                                                                                                                                                                                                                                                                                                                                                                                                                                                                                                                                                                                                                                                                                                                                                                                                                                                                                                                                                                                                                                                                                                                                                                                                                                                                                                     | San Diego County Public Health Laboratory        | Andersen lab at Scripps Research                                                          | SEARCH Alliance San Diego with Tracy Basler, Jovan Shephard, Brett Austin                                                                                                                                                                                                                                                                                                                                                                                                                                                                                                                                                                                                                                                                                                                                                                                                                            |
| EPI_ISL_1318377, EPI_ISL_1318378, EPI_ISL_1318379, EPI_ISL_1318380                                                                                                                                                                                                                                                                                                                                                                                                                                                                                                                                                                                                                                                                                                                                                                                                                                                                                                                                                                                                                                                                                                                                                                                                                                                                                                                                                                                                                                                                                                                                                                                                                                                                                                  | CA-Los Angeles County Public Health Laboratory   | Centers for Disease Control and Prevention Division of Viral Diseases, Pathogen Discovery | Krista Queen, Yan Li, Ying Tao, Jing Zhang, Anna Uehara, Anna Montmayeur, Clinton R. Paden, Kristen Knipe, Matthew Scherer, Shoshona Le, Katie Dillon, Peter W. Cook, Rachel Marine, Mili Sheth, Jasmine Padilla, Sarah Nobles, Mark Burroughs, Lori Rowe, Haibin Wang, Ben L. Rambo-Martin, Kristine Lacek, Sam Shepard, Dhvani Batra, Suxiang Tong, Justin Lee                                                                                                                                                                                                                                                                                                                                                                                                                                                                                                                                     |
| EPI_ISL_1318634, EPI_ISL_1318635, EPI_ISL_1318636, EPI_ISL_1318637, EPI_ISL_1318638, EPI_ISL_1318639, EPI_ISL_1318640, EPI_ISL_1318641, EPI_ISL_1318642, EPI_ISL_1318643, EPI_ISL_1318644, EPI_ISL_1318645, EPI_ISL_1318646, EPI_ISL_1318647, EPI_ISL_1318648, EPI_ISL_1318649, EPI_ISL_1318650, EPI_ISL_1318651, EPI_ISL_1318652, EPI_ISL_1318653, EPI_ISL_1318654, EPI_ISL_1318655, EPI_ISL_1318656, EPI_ISL_1318657, EPI_ISL_1318658, EPI_ISL_1318659, EPI_ISL_1318660, EPI_ISL_1318661, EPI_ISL_1318662, EPI_ISL_1318663, EPI_ISL_1318664, EPI_ISL_1318665, EPI_ISL_1318666, EPI_ISL_1318667                                                                                                                                                                                                                                                                                                                                                                                                                                                                                                                                                                                                                                                                                                                                                                                                                                                                                                                                                                                                                                                                                                                                                                    |                                                  |                                                                                           |                                                                                                                                                                                                                                                                                                                                                                                                                                                                                                                                                                                                                                                                                                                                                                                                                                                                                                      |
| see above                                                                                                                                                                                                                                                                                                                                                                                                                                                                                                                                                                                                                                                                                                                                                                                                                                                                                                                                                                                                                                                                                                                                                                                                                                                                                                                                                                                                                                                                                                                                                                                                                                                                                                                                                           | "CDPH, Viral and Rickettsial Disease Laboratory" | Centers for Disease Control and Prevention Division of Viral Diseases, Pathogen Discovery | Krista Queen, Yan Li, Ying Tao, Jing Zhang, Anna Uehara, Anna Montmayeur, Clinton R. Paden, Kristen Knipe, Matthew Scherer, Shoshona Le, Katie Dillon, Peter W. Cook, Rachel Marine, Mili Sheth, Jasmine Padilla, Sarah Nobles, Mark Burroughs, Lori Rowe, Haibin Wang, Ben L. Rambo-Martin, Kristine Lacek, Sam Shepard, Dhvani Batra, Suxiang Tong, Justin Lee                                                                                                                                                                                                                                                                                                                                                                                                                                                                                                                                     |
| EPI_ISL_1318697, EPI_ISL_1318699, EPI_ISL_1318701, EPI_ISL_1318702, EPI_ISL_1318704, EPI_ISL_1318705, EPI_ISL_1318708, EPI_ISL_1318709, EPI_ISL_1318711, EPI_ISL_1318713, EPI_ISL_1318714, EPI_ISL_1318716, EPI_ISL_1318718, EPI_ISL_1318720, EPI_ISL_1318721, EPI_ISL_1318726, EPI_ISL_1318727, EPI_ISL_1318728, EPI_ISL_1318730, EPI_ISL_1318731, EPI_ISL_1318733, EPI_ISL_1318736, EPI_ISL_1318738, EPI_ISL_1318739, EPI_ISL_1318740, EPI_ISL_1318741, EPI_ISL_1318742, EPI_ISL_1318743, EPI_ISL_1318744, EPI_ISL_1318745, EPI_ISL_1318746, EPI_ISL_1318748, EPI_ISL_1318750, EPI_ISL_1318751, EPI_ISL_1318753, EPI_ISL_1318754, EPI_ISL_1318755, EPI_ISL_1318757, EPI_ISL_1318758, EPI_ISL_1318759, EPI_ISL_1318761, EPI_ISL_1318763, EPI_ISL_1318764, EPI_ISL_1318767, EPI_ISL_1318769, EPI_ISL_1318770, EPI_ISL_1318773, EPI_ISL_1318775, EPI_ISL_1318776, EPI_ISL_1318777, EPI_ISL_1318779, EPI_ISL_1318780, EPI_ISL_1318781, EPI_ISL_1318782, EPI_ISL_1318783, EPI_ISL_1318786, EPI_ISL_1318787, EPI_ISL_1318789, EPI_ISL_1318791, EPI_ISL_1318794, EPI_ISL_1318796, EPI_ISL_1318798, EPI_ISL_1318802, EPI_ISL_1318803, EPI_ISL_1318804, EPI_ISL_1318805, EPI_ISL_1318806, EPI_ISL_1318808, EPI_ISL_1318810, EPI_ISL_1318811, EPI_ISL_1318812, EPI_ISL_1318817, EPI_ISL_1318818, EPI_ISL_1318819, EPI_ISL_1318820, EPI_ISL_1318821, EPI_ISL_1318823, EPI_ISL_1318826, EPI_ISL_1318827, EPI_ISL_1318829, EPI_ISL_1318830, EPI_ISL_1318831, EPI_ISL_1318832, EPI_ISL_1318833, EPI_ISL_1318834, EPI_ISL_1318836, EPI_ISL_1318840, EPI_ISL_1318841, EPI_ISL_1318842, EPI_ISL_1318845, EPI_ISL_1318846, EPI_ISL_1318847, EPI_ISL_1318848, EPI_ISL_1318850, EPI_ISL_1318851, EPI_ISL_1318852, EPI_ISL_1318853, EPI_ISL_1318855, EPI_ISL_1318856, EPI_ISL_1318857, |                                                  |                                                                                           |                                                                                                                                                                                                                                                                                                                                                                                                                                                                                                                                                                                                                                                                                                                                                                                                                                                                                                      |

|                                                                                                                                                                                                                                                                                                                                                                                                                                                                                                                                                                                                                                                                                                                                                                                                                                                                                                                                                                                                                                                                                                                                                                                                                                                                                                                                                                                                                                                                                                     |           |                                                     |                                                                                           |                                                                                                                                                                                                                                                                                                                                                                                                                                                                                                                                                                                                                                                                                                                                                                                                                                                                                                      |
|-----------------------------------------------------------------------------------------------------------------------------------------------------------------------------------------------------------------------------------------------------------------------------------------------------------------------------------------------------------------------------------------------------------------------------------------------------------------------------------------------------------------------------------------------------------------------------------------------------------------------------------------------------------------------------------------------------------------------------------------------------------------------------------------------------------------------------------------------------------------------------------------------------------------------------------------------------------------------------------------------------------------------------------------------------------------------------------------------------------------------------------------------------------------------------------------------------------------------------------------------------------------------------------------------------------------------------------------------------------------------------------------------------------------------------------------------------------------------------------------------------|-----------|-----------------------------------------------------|-------------------------------------------------------------------------------------------|------------------------------------------------------------------------------------------------------------------------------------------------------------------------------------------------------------------------------------------------------------------------------------------------------------------------------------------------------------------------------------------------------------------------------------------------------------------------------------------------------------------------------------------------------------------------------------------------------------------------------------------------------------------------------------------------------------------------------------------------------------------------------------------------------------------------------------------------------------------------------------------------------|
| EPI_ISL_1318858, EPI_ISL_1318861, EPI_ISL_1318862, EPI_ISL_1318863, EPI_ISL_1318866, EPI_ISL_1318867, EPI_ISL_1318868, EPI_ISL_1318869, EPI_ISL_1318871, EPI_ISL_1318873, EPI_ISL_1318874, EPI_ISL_1318875, EPI_ISL_1318876, EPI_ISL_1318878, EPI_ISL_1318879, EPI_ISL_1318880, EPI_ISL_1318884, EPI_ISL_1318885, EPI_ISL_1318886, EPI_ISL_1318888, EPI_ISL_1318889, EPI_ISL_1318890, EPI_ISL_1318893, EPI_ISL_1318896, EPI_ISL_1318898, EPI_ISL_1318900, EPI_ISL_1318901, EPI_ISL_1318902, EPI_ISL_1318905, EPI_ISL_1318906, EPI_ISL_1318907, EPI_ISL_1318908, EPI_ISL_1318911, EPI_ISL_1318915, EPI_ISL_1318917, EPI_ISL_1318918, EPI_ISL_1318919, EPI_ISL_1318920, EPI_ISL_1318921, EPI_ISL_1318924, EPI_ISL_1318925, EPI_ISL_1318926, EPI_ISL_1318927, EPI_ISL_1318928, EPI_ISL_1318930, EPI_ISL_1318931, EPI_ISL_1318935, EPI_ISL_1318936, EPI_ISL_1318937, EPI_ISL_1318945, EPI_ISL_1318946, EPI_ISL_1318948, EPI_ISL_1318951, EPI_ISL_1318952, EPI_ISL_1318953, EPI_ISL_1318954, EPI_ISL_1318956, EPI_ISL_1318957, EPI_ISL_1318958, EPI_ISL_1318988                                                                                                                                                                                                                                                                                                                                                                                                                                          | see above | DeRisi Lab, University of California, San Francisco | DeRisi Lab, University of California, San Francisco                                       | Sabrina Mann, Anthea Mitchell, Jamin Liu, Sara Sunshine, Matthew Laurie, Genay Pilarowski, Amy Kistler, Manu Vanaerschot, Patrick Ayscue, Lucy Li, Eric Chow, IDeq Team, James Peng, Carina Marquez, Luis Rubio, Gabriel Chamie, Diane Jones, Jon Jacobo, Susana Rojas, Susy Rojas, Valerie Tulier-Laiwa, Douglas Black, Jackie Martinez, Maya Petersen, Diane Havir, and Joseph DeRisi                                                                                                                                                                                                                                                                                                                                                                                                                                                                                                              |
| EPI_ISL_1320048, EPI_ISL_1320049, EPI_ISL_1320053, EPI_ISL_1320054, EPI_ISL_1320055, EPI_ISL_1320056, EPI_ISL_1320058, EPI_ISL_1320059, EPI_ISL_1320065, EPI_ISL_1320067, EPI_ISL_1320072, EPI_ISL_1320073, EPI_ISL_1320084, EPI_ISL_1320090, EPI_ISL_1320092, EPI_ISL_1320095, EPI_ISL_1320097, EPI_ISL_1320146, EPI_ISL_1320149, EPI_ISL_1320277, EPI_ISL_1320289, EPI_ISL_1320290, EPI_ISL_1320293, EPI_ISL_1320302, EPI_ISL_1320304, EPI_ISL_1320305, EPI_ISL_1320310, EPI_ISL_1320312, EPI_ISL_1320316, EPI_ISL_1320318, EPI_ISL_1320319, EPI_ISL_1320328, EPI_ISL_1320329, EPI_ISL_1320585, EPI_ISL_1321013, EPI_ISL_1321014, EPI_ISL_1321026, EPI_ISL_1321030, EPI_ISL_1321031, EPI_ISL_1321035, EPI_ISL_1321036, EPI_ISL_1321040, EPI_ISL_1321060, EPI_ISL_1321061, EPI_ISL_1321064, EPI_ISL_1321067, EPI_ISL_1321072, EPI_ISL_1321078, EPI_ISL_1321073, EPI_ISL_1321132, EPI_ISL_1321134, EPI_ISL_1321145, EPI_ISL_1321148, EPI_ISL_1321178, EPI_ISL_1321181, EPI_ISL_1321191, EPI_ISL_1321198, EPI_ISL_1321203, EPI_ISL_1321207, EPI_ISL_1321210, EPI_ISL_1321215, EPI_ISL_1321236, EPI_ISL_1321240, EPI_ISL_1321242, EPI_ISL_1321243, EPI_ISL_1321250, EPI_ISL_1321259, EPI_ISL_1321263, EPI_ISL_1321264, EPI_ISL_1321269, EPI_ISL_1321279, EPI_ISL_1321293, EPI_ISL_1321296, EPI_ISL_1321297, EPI_ISL_1321300, EPI_ISL_1321302, EPI_ISL_1321304, EPI_ISL_1321306, EPI_ISL_1321322, EPI_ISL_1321325, EPI_ISL_1321328, EPI_ISL_1321332, EPI_ISL_1321334, EPI_ISL_1321337, EPI_ISL_1321347 | see above | Laboratory Corporation of America                   | Centers for Disease Control and Prevention Division of Viral Diseases, Pathogen Discovery | Peter W. Cook, Dakota Howard, Dhvani Batra, Ben L. Rambo-Martin, Minoo Agarwal, Eyad Almasri, Debbie Boles, Ayla Burns, Nuthin Charoensri, Oren Cohen, Susan Countryman, Mary Ann Cristobal, Bobbi Croy, Suzanne Dale, Hrushikesh Deshmukh, Amanda Douglas, Vincent Drouillon, Marcia Eisenberg, Howard Engler, Rama Ghatti, Prashant Gupta, Susan Hicks, Jake Humphrey, Lax Iyer, Manoj Jain, Mohan Koli, Brian Krueger, Tim Kuphal, Stanley Letovsky, Michael Levandoski, Craig Lukasik, Jonathan Meltzer, Brian Norvell, Mindy Nye, Scott Parker, Christos Petropoulos, John Pruitt, Steven Ragan, Scott Ryan, Mike Sapeta, Jana Schroth, Suresh Babu Selvaraju, Goran Stevovic, Amanda Suchanek, Andrea Throop, Lyndon Tilson, Thomas Urban, Joe Voshell, Kimberly Wagner, Jonathan Williams, Mary Williamson, Qian Zeng, Tricia Zwiefelhofer, Clinton R. Paden, Suxiang Tong, Duncan MacCannell |
| EPI_ISL_1335805, EPI_ISL_1335806, EPI_ISL_1335809, EPI_ISL_1335810, EPI_ISL_1335811, EPI_ISL_1335812, EPI_ISL_1335813, EPI_ISL_1335817, EPI_ISL_1335820, EPI_ISL_1335826, EPI_ISL_1335827, EPI_ISL_1335857, EPI_ISL_1335866, EPI_ISL_1335868                                                                                                                                                                                                                                                                                                                                                                                                                                                                                                                                                                                                                                                                                                                                                                                                                                                                                                                                                                                                                                                                                                                                                                                                                                                        | see above | Santa Clara County Public Health Laboratory         | Santa Clara County Public Health Laboratory                                               | Santa Clara County Public Health Department                                                                                                                                                                                                                                                                                                                                                                                                                                                                                                                                                                                                                                                                                                                                                                                                                                                          |
| EPI_ISL_1335915, EPI_ISL_1335973, EPI_ISL_1335987, EPI_ISL_1335993, EPI_ISL_1335995, EPI_ISL_1335996, EPI_ISL_1336068, EPI_ISL_1336087, EPI_ISL_1336092, EPI_ISL_1336094, EPI_ISL_1336104, EPI_ISL_1336105, EPI_ISL_1336106, EPI_ISL_1336157                                                                                                                                                                                                                                                                                                                                                                                                                                                                                                                                                                                                                                                                                                                                                                                                                                                                                                                                                                                                                                                                                                                                                                                                                                                        | see above | Quest Diagnostics Incorporated                      | Centers for Disease Control and Prevention Division of Viral Diseases, Pathogen Discovery | Peter W. Cook, Dakota Howard, Dhvani Batra, Ben L. Rambo-Martin, S. H. Rosenthal, A. Gerasimova, R. M. Kagan, B. Anderson, M. Hua, Y. Liu, L.E. Bernstein, K.E. Livingston, A. Perez, I. A. Shlyakhter, R. V. Rolando, R. Owen, P. Tanpaiboon, F. Lacbawan, Clinton R. Paden, Suxiang Tong, Duncan MacCannell                                                                                                                                                                                                                                                                                                                                                                                                                                                                                                                                                                                        |
| EPI_ISL_1336965, EPI_ISL_1336973, EPI_ISL_1336975, EPI_ISL_1337010, EPI_ISL_1337017, EPI_ISL_1337027, EPI_ISL_1337029, EPI_ISL_1337039, EPI_ISL_1337040, EPI_ISL_1337068, EPI_ISL_1337071, EPI_ISL_1337073, EPI_ISL_1337095, EPI_ISL_1337109, EPI_ISL_1337132, EPI_ISL_1337188, EPI_ISL_1337211, EPI_ISL_1337399, EPI_ISL_1338070, EPI_ISL_1338072, EPI_ISL_1338074, EPI_ISL_1338085, EPI_ISL_1338087, EPI_ISL_1338091, EPI_ISL_1338101, EPI_ISL_1338122, EPI_ISL_1338124, EPI_ISL_1338130, EPI_ISL_1338133, EPI_ISL_1338156, EPI_ISL_1338170, EPI_ISL_1338204, EPI_ISL_1338210, EPI_ISL_1338212, EPI_ISL_1338226, EPI_ISL_1338230, EPI_ISL_1338233, EPI_ISL_1338245, EPI_ISL_1338289, EPI_ISL_1338307, EPI_ISL_1338333, EPI_ISL_1338394                                                                                                                                                                                                                                                                                                                                                                                                                                                                                                                                                                                                                                                                                                                                                            | see above | Helix/Illumina                                      | Centers for Disease Control and Prevention Division of Viral Diseases, Pathogen Discovery | Peter W. Cook, Dakota Howard, Dhvani Batra, Ben L. Rambo-Martin, Eileen de Feo, Jan Antico, Christine Tran, Matthew Tolentino, Shannon Wickline, Kim Gietzen, Brad Slicker, Jingtao Liu, Eric Allen, Phil Febbo, Summer Galloway, Nicole L. Washington, Simon White, Geraint Levant, Kelly Schiabor Barrett, Elizabeth Cirulli, Alexandre Bolze, Ary Ascencio, Charlotte Rivera-Garcia, Ryan Cho, Jason Nguyen, Sherry Wang, Jimmy Ramirez, Tyler Cassens, Efrén Sandoval, Magnus Isaksson, William Lee, David Becker, Marc Laurent, James Lu, Clinton R. Paden, Suxiang Tong, Duncan MacCannell                                                                                                                                                                                                                                                                                                     |
| EPI_ISL_1338897, EPI_ISL_1338900, EPI_ISL_1338901, EPI_ISL_1338904, EPI_ISL_1338906, EPI_ISL_1338907, EPI_ISL_1338908, EPI_ISL_1338912, EPI_ISL_1338923, EPI_ISL_1338925, EPI_ISL_1338926, EPI_ISL_1338928, EPI_ISL_1338930, EPI_ISL_1338932, EPI_ISL_1338933, EPI_ISL_1338934, EPI_ISL_1338935, EPI_ISL_1338938, EPI_ISL_1338939, EPI_ISL_1338953, EPI_ISL_1338954, EPI_ISL_1339006, EPI_ISL_1339057, EPI_ISL_1339091, EPI_ISL_1339095, EPI_ISL_1339158, EPI_ISL_1339160, EPI_ISL_1339161, EPI_ISL_1339162, EPI_ISL_1339182, EPI_ISL_1339184, EPI_ISL_1339186, EPI_ISL_1339234, EPI_ISL_1339251                                                                                                                                                                                                                                                                                                                                                                                                                                                                                                                                                                                                                                                                                                                                                                                                                                                                                                    | see above | Laboratory Corporation of America                   | Centers for Disease Control and Prevention Division of Viral Diseases, Pathogen Discovery | Peter W. Cook, Dakota Howard, Dhvani Batra, Ben L. Rambo-Martin, Minoo Agarwal, Eyad Almasri, Debbie Boles, Ayla Burns, Nuthin Charoensri, Oren Cohen, Susan Countryman, Mary Ann Cristobal, Bobbi Croy, Suzanne Dale, Hrushikesh Deshmukh, Amanda Douglas, Vincent Drouillon, Marcia Eisenberg, Howard Engler, Rama Ghatti, Prashant Gupta, Susan Hicks, Jake Humphrey, Lax Iyer, Manoj Jain, Mohan Koli, Brian Krueger, Tim Kuphal, Stanley Letovsky, Michael Levandoski, Craig Lukasik, Jonathan Meltzer, Brian Norvell, Mindy Nye, Scott Parker, Christos Petropoulos, John Pruitt, Steven Ragan, Scott Ryan, Mike Sapeta, Jana Schroth, Suresh Babu Selvaraju, Goran Stevovic, Amanda Suchanek, Andrea Throop, Lyndon Tilson, Thomas Urban, Joe Voshell, Kimberly Wagner, Jonathan Williams, Mary Williamson, Qian Zeng, Tricia Zwiefelhofer, Clinton R. Paden, Suxiang Tong, Duncan MacCannell |
| EPI_ISL_1339830, EPI_ISL_1339837, EPI_ISL_1339839, EPI_ISL_1339850, EPI_ISL_1339866, EPI_ISL_1339876, EPI_ISL_1339877, EPI_ISL_1339881, EPI_ISL_1339892, EPI_ISL_1339893, EPI_ISL_1339896, EPI_ISL_1339910, EPI_ISL_1339913, EPI_ISL_1339917, EPI_ISL_1339928, EPI_ISL_1339935, EPI_ISL_1339949, EPI_ISL_1339964                                                                                                                                                                                                                                                                                                                                                                                                                                                                                                                                                                                                                                                                                                                                                                                                                                                                                                                                                                                                                                                                                                                                                                                    | see above | Quest Diagnostics Incorporated                      | Centers for Disease Control and Prevention Division of Viral Diseases, Pathogen Discovery | Peter W. Cook, Dakota Howard, Dhvani Batra, Ben L. Rambo-Martin, S. H. Rosenthal, A. Gerasimova, R. M. Kagan, B. Anderson, M. Hua, Y. Liu, L.E. Bernstein, K.E. Livingston, A. Perez, I. A. Shlyakhter, R. V. Rolando, R. Owen, P. Tanpaiboon, F. Lacbawan, Clinton R. Paden, Suxiang Tong, Duncan MacCannell                                                                                                                                                                                                                                                                                                                                                                                                                                                                                                                                                                                        |
| EPI_ISL_1340060, EPI_ISL_1340061, EPI_ISL_1340068, EPI_ISL_1340083, EPI_ISL_1340084, EPI_ISL_1340088, EPI_ISL_1340090, EPI_ISL_1340096, EPI_ISL_1340129, EPI_ISL_1340251, EPI_ISL_1340254, EPI_ISL_1340258, EPI_ISL_1340260, EPI_ISL_1340264, EPI_ISL_1340265, EPI_ISL_1340275, EPI_ISL_1340301, EPI_ISL_1340305, EPI_ISL_1340308, EPI_ISL_1340337, EPI_ISL_1340339, EPI_ISL_1340368, EPI_ISL_1340373, EPI_ISL_1340377, EPI_ISL_1340384, EPI_ISL_1340447                                                                                                                                                                                                                                                                                                                                                                                                                                                                                                                                                                                                                                                                                                                                                                                                                                                                                                                                                                                                                                            | see above | Helix/Illumina                                      | Centers for Disease Control and Prevention Division of Viral Diseases, Pathogen Discovery | Peter W. Cook, Dakota Howard, Dhvani Batra, Ben L. Rambo-Martin, Eileen de Feo, Jan Antico, Christine Tran, Matthew Tolentino, Shannon Wickline, Kim Gietzen, Brad Slicker, Jingtao Liu, Eric Allen, Phil Febbo, Summer Galloway, Nicole L. Washington, Simon White, Geraint Levant, Kelly Schiabor Barrett, Elizabeth Cirulli, Alexandre Bolze, Ary Ascencio, Charlotte Rivera-Garcia, Ryan Cho, Jason Nguyen, Sherry Wang, Jimmy Ramirez, Tyler Cassens, Efrén Sandoval, Magnus Isaksson, William Lee, David Becker, Marc Laurent, James Lu, Clinton R. Paden, Suxiang Tong, Duncan MacCannell                                                                                                                                                                                                                                                                                                     |
| EPI_ISL_1340679                                                                                                                                                                                                                                                                                                                                                                                                                                                                                                                                                                                                                                                                                                                                                                                                                                                                                                                                                                                                                                                                                                                                                                                                                                                                                                                                                                                                                                                                                     |           | Quest Diagnostics Incorporated                      | Centers for Disease Control and Prevention Division of Viral Diseases, Pathogen Discovery | Peter W. Cook, Dakota Howard, Dhvani Batra, Ben L. Rambo-Martin, S. H. Rosenthal, A. Gerasimova, R. M. Kagan, B. Anderson, M. Hua, Y. Liu, L.E. Bernstein, K.E. Livingston, A. Perez, I. A. Shlyakhter, R. V. Rolando, R. Owen, P. Tanpaiboon, F. Lacbawan, Clinton R. Paden, Suxiang Tong, Duncan MacCannell                                                                                                                                                                                                                                                                                                                                                                                                                                                                                                                                                                                        |
| EPI_ISL_1347783, EPI_ISL_1347785, EPI_ISL_1347786, EPI_ISL_1347787, EPI_ISL_1347788, EPI_ISL_1347789, EPI_ISL_1349078, EPI_ISL_1349080                                                                                                                                                                                                                                                                                                                                                                                                                                                                                                                                                                                                                                                                                                                                                                                                                                                                                                                                                                                                                                                                                                                                                                                                                                                                                                                                                              |           | DeRisi Lab, University of California, San Francisco | DeRisi Lab, University of California, San Francisco                                       | Sabrina Mann, Anthea Mitchell, Jamin Liu, Sara Sunshine, Matthew Laurie, Genay Pilarowski, Amy Kistler, Manu Vanaerschot, Patrick Ayscue, Lucy Li, Eric Chow, IDeq Team, James Peng, Carina Marquez, Luis Rubio, Gabriel Chamie, Diane Jones, Jon Jacobo, Susana Rojas, Susy Rojas, Valerie Tulier-Laiwa, Douglas Black, Jackie Martinez, Maya Petersen, Diane Havir, and Joseph DeRisi                                                                                                                                                                                                                                                                                                                                                                                                                                                                                                              |
| EPI_ISL_1364513, EPI_ISL_1364514, EPI_ISL_1364517, EPI_ISL_1364521, EPI_ISL_1364522, EPI_ISL_1364523, EPI_ISL_1364524, EPI_ISL_1364525                                                                                                                                                                                                                                                                                                                                                                                                                                                                                                                                                                                                                                                                                                                                                                                                                                                                                                                                                                                                                                                                                                                                                                                                                                                                                                                                                              |           | Stanford Health Care                                | Stanford University School of Medicine, Clinical Virology Laboratory                      | Daniel Solis, Mamdouh Sibai, Fumiko Yamamoto, Malaya K. Sahoo, Michelle Verghese, ChunHong Huang, James Zehnder, and Benjamin A. Pinsky                                                                                                                                                                                                                                                                                                                                                                                                                                                                                                                                                                                                                                                                                                                                                              |
| EPI_ISL_1364526                                                                                                                                                                                                                                                                                                                                                                                                                                                                                                                                                                                                                                                                                                                                                                                                                                                                                                                                                                                                                                                                                                                                                                                                                                                                                                                                                                                                                                                                                     |           | Stanford Health Care                                | Stanford University School of Medicine, Clinical Virology Laboratory                      | Daniel Solis, Mamdouh Sibai, Fumiko Yamamoto, Becky Jiang, Malaya K. Sahoo, Michelle Verghese, ChunHong Huang, James Zehnder, and Benjamin A. Pinsky                                                                                                                                                                                                                                                                                                                                                                                                                                                                                                                                                                                                                                                                                                                                                 |
| EPI_ISL_1364729                                                                                                                                                                                                                                                                                                                                                                                                                                                                                                                                                                                                                                                                                                                                                                                                                                                                                                                                                                                                                                                                                                                                                                                                                                                                                                                                                                                                                                                                                     |           | Arizona State University                            | Arizona State University                                                                  | Peter T. Skidmore, LaRinda A. Holland, Rabia Maqsood, Emily A. Kaelin, Nicholas J. Mellor, Kristina Buss, Joy M. Blain, Neal W Woodbury, Valerie Harris, Joshua LaBaer, Vel Murugan, Efrém S. Lim                                                                                                                                                                                                                                                                                                                                                                                                                                                                                                                                                                                                                                                                                                    |
| EPI_ISL_1366291, EPI_ISL_1366292                                                                                                                                                                                                                                                                                                                                                                                                                                                                                                                                                                                                                                                                                                                                                                                                                                                                                                                                                                                                                                                                                                                                                                                                                                                                                                                                                                                                                                                                    |           | Sharp HealthCare Laboratory                         | Andersen lab at Scripps Research                                                          | SEARCH Alliance San Diego with Aaron Harding, Jacquelyn Berumen, Cathy Woerle, Liam McGinnis, Art Mendoza, Omid Bakhtar                                                                                                                                                                                                                                                                                                                                                                                                                                                                                                                                                                                                                                                                                                                                                                              |
| EPI_ISL_1366297                                                                                                                                                                                                                                                                                                                                                                                                                                                                                                                                                                                                                                                                                                                                                                                                                                                                                                                                                                                                                                                                                                                                                                                                                                                                                                                                                                                                                                                                                     |           | Scripps Medical Laboratory                          | Andersen lab at Scripps Research                                                          | SEARCH Alliance San Diego with Michael Quigley, Ellen Stefanski, Ian Mchardy                                                                                                                                                                                                                                                                                                                                                                                                                                                                                                                                                                                                                                                                                                                                                                                                                         |
| EPI_ISL_1366298, EPI_ISL_1366299, EPI_ISL_1366300, EPI_ISL_1366301, EPI_ISL_1366302, EPI_ISL_1366303, EPI_ISL_1366304, EPI_ISL_1366305, EPI_ISL_1366306, EPI_ISL_1366307, EPI_ISL_1366308, EPI_ISL_1366309, EPI_ISL_1366310, EPI_ISL_1366311, EPI_ISL_1366312, EPI_ISL_1366313, EPI_ISL_1366314, EPI_ISL_1366315, EPI_ISL_1366317, EPI_ISL_1366319                                                                                                                                                                                                                                                                                                                                                                                                                                                                                                                                                                                                                                                                                                                                                                                                                                                                                                                                                                                                                                                                                                                                                  | see above | Sharp HealthCare Laboratory                         | Andersen lab at Scripps Research                                                          | SEARCH Alliance San Diego with Aaron Harding, Jacquelyn Berumen, Cathy Woerle, Liam McGinnis, Art Mendoza, Omid Bakhtar                                                                                                                                                                                                                                                                                                                                                                                                                                                                                                                                                                                                                                                                                                                                                                              |
| EPI_ISL_1366320                                                                                                                                                                                                                                                                                                                                                                                                                                                                                                                                                                                                                                                                                                                                                                                                                                                                                                                                                                                                                                                                                                                                                                                                                                                                                                                                                                                                                                                                                     |           | Scripps Medical Laboratory                          | Andersen lab at Scripps Research                                                          | SEARCH Alliance San Diego with Michael Quigley, Ellen Stefanski, Ian Mchardy                                                                                                                                                                                                                                                                                                                                                                                                                                                                                                                                                                                                                                                                                                                                                                                                                         |
| EPI_ISL_1366321                                                                                                                                                                                                                                                                                                                                                                                                                                                                                                                                                                                                                                                                                                                                                                                                                                                                                                                                                                                                                                                                                                                                                                                                                                                                                                                                                                                                                                                                                     |           | Sharp HealthCare Laboratory                         | Andersen lab at Scripps Research                                                          | SEARCH Alliance San Diego with Aaron Harding, Jacquelyn Berumen, Cathy Woerle, Liam McGinnis, Art Mendoza, Omid Bakhtar                                                                                                                                                                                                                                                                                                                                                                                                                                                                                                                                                                                                                                                                                                                                                                              |



|                                                                                                                                                                                                                                                                                                                                                                                                                                                                                                                                                                                                                                                                                                                                                                                                                                                                                                                                                                                                                                                                                                                                                                                                                                                                        |                                                                                           |                                                                                                                                                                                                                                                                                                               |                                                                                                                                                                                                                                                                                                                                                                                                                                                                                                                                                                                                 |
|------------------------------------------------------------------------------------------------------------------------------------------------------------------------------------------------------------------------------------------------------------------------------------------------------------------------------------------------------------------------------------------------------------------------------------------------------------------------------------------------------------------------------------------------------------------------------------------------------------------------------------------------------------------------------------------------------------------------------------------------------------------------------------------------------------------------------------------------------------------------------------------------------------------------------------------------------------------------------------------------------------------------------------------------------------------------------------------------------------------------------------------------------------------------------------------------------------------------------------------------------------------------|-------------------------------------------------------------------------------------------|---------------------------------------------------------------------------------------------------------------------------------------------------------------------------------------------------------------------------------------------------------------------------------------------------------------|-------------------------------------------------------------------------------------------------------------------------------------------------------------------------------------------------------------------------------------------------------------------------------------------------------------------------------------------------------------------------------------------------------------------------------------------------------------------------------------------------------------------------------------------------------------------------------------------------|
| EPI_ISL_1366322                                                                                                                                                                                                                                                                                                                                                                                                                                                                                                                                                                                                                                                                                                                                                                                                                                                                                                                                                                                                                                                                                                                                                                                                                                                        | Scripps Medical Laboratory                                                                | Andersen lab at Scripps Research                                                                                                                                                                                                                                                                              | SEARCH Alliance San Diego with Michael Quigley, Ellen Stefanski, Ian Mchardy                                                                                                                                                                                                                                                                                                                                                                                                                                                                                                                    |
| EPI_ISL_1366323                                                                                                                                                                                                                                                                                                                                                                                                                                                                                                                                                                                                                                                                                                                                                                                                                                                                                                                                                                                                                                                                                                                                                                                                                                                        | Sharp HealthCare Laboratory                                                               | Andersen lab at Scripps Research                                                                                                                                                                                                                                                                              | SEARCH Alliance San Diego with Aaron Harding, Jacquelyn Berumen, Cathy Woerle, Liam McGinnis, Art Mendoza, Omid Bakhtar                                                                                                                                                                                                                                                                                                                                                                                                                                                                         |
| EPI_ISL_1366379, EPI_ISL_1366380, EPI_ISL_1366381, EPI_ISL_1366382, EPI_ISL_1366383, EPI_ISL_1366384, EPI_ISL_1366385, EPI_ISL_1366386, EPI_ISL_1366387, EPI_ISL_1366390, EPI_ISL_1366391, EPI_ISL_1366392, EPI_ISL_1366394, EPI_ISL_1366395, EPI_ISL_1366396, EPI_ISL_1366399, EPI_ISL_1366403, EPI_ISL_1366404, EPI_ISL_1366405, EPI_ISL_1366406, EPI_ISL_1366407, EPI_ISL_1366408, EPI_ISL_1366409, EPI_ISL_1366410, EPI_ISL_1366411, EPI_ISL_1366412, EPI_ISL_1366413, EPI_ISL_1366414, EPI_ISL_1366415, EPI_ISL_1366416, EPI_ISL_1366417, EPI_ISL_1366418, EPI_ISL_1366419, EPI_ISL_1366420, EPI_ISL_1366421, EPI_ISL_1366422, EPI_ISL_1366423                                                                                                                                                                                                                                                                                                                                                                                                                                                                                                                                                                                                                    | Andersen lab at Scripps Research                                                          | SEARCH Alliance San Diego with Michael Quigley, Ellen Stefanski, Ian Mchardy                                                                                                                                                                                                                                  |                                                                                                                                                                                                                                                                                                                                                                                                                                                                                                                                                                                                 |
| see above                                                                                                                                                                                                                                                                                                                                                                                                                                                                                                                                                                                                                                                                                                                                                                                                                                                                                                                                                                                                                                                                                                                                                                                                                                                              | Scripps Medical Laboratory                                                                | Andersen lab at Scripps Research                                                                                                                                                                                                                                                                              | SEARCH Alliance San Diego with Michael Quigley, Ellen Stefanski, Ian Mchardy                                                                                                                                                                                                                                                                                                                                                                                                                                                                                                                    |
| EPI_ISL_1366424, EPI_ISL_1366425, EPI_ISL_1366426, EPI_ISL_1366427, EPI_ISL_1366428, EPI_ISL_1366429, EPI_ISL_1366430, EPI_ISL_1366431, EPI_ISL_1366432, EPI_ISL_1366433, EPI_ISL_1366434, EPI_ISL_1366435, EPI_ISL_1366436, EPI_ISL_1366437, EPI_ISL_1366438, EPI_ISL_1366439, EPI_ISL_1366440, EPI_ISL_1366441, EPI_ISL_1366442, EPI_ISL_1366443, EPI_ISL_1366444, EPI_ISL_1366445, EPI_ISL_1366446, EPI_ISL_1366447, EPI_ISL_1366448, EPI_ISL_1366449, EPI_ISL_1366450, EPI_ISL_1366451, EPI_ISL_1366452, EPI_ISL_1366453, EPI_ISL_1366454, EPI_ISL_1366455, EPI_ISL_1366456, EPI_ISL_1366457, EPI_ISL_1366458, EPI_ISL_1366459, EPI_ISL_1366460, EPI_ISL_1366461, EPI_ISL_1366462, EPI_ISL_1366463, EPI_ISL_1366464, EPI_ISL_1366465, EPI_ISL_1366466, EPI_ISL_1366467, EPI_ISL_1366468, EPI_ISL_1366469, EPI_ISL_1366470, EPI_ISL_1366471, EPI_ISL_1366472, EPI_ISL_1366473, EPI_ISL_1366474, EPI_ISL_1366475, EPI_ISL_1366476, EPI_ISL_1366477, EPI_ISL_1366478, EPI_ISL_1366479, EPI_ISL_1366480, EPI_ISL_1366481, EPI_ISL_1366482, EPI_ISL_1366483, EPI_ISL_1366484, EPI_ISL_1366485, EPI_ISL_1366486, EPI_ISL_1366487, EPI_ISL_1366488, EPI_ISL_1366489, EPI_ISL_1366491, EPI_ISL_1366492, EPI_ISL_1366493, EPI_ISL_1366494, EPI_ISL_1366495, EPI_ISL_1366496 | Andersen lab at Scripps Research                                                          | SEARCH Alliance San Diego with Aaron Harding, Jacquelyn Berumen, Cathy Woerle, Liam McGinnis, Art Mendoza, Omid Bakhtar                                                                                                                                                                                       |                                                                                                                                                                                                                                                                                                                                                                                                                                                                                                                                                                                                 |
| see above                                                                                                                                                                                                                                                                                                                                                                                                                                                                                                                                                                                                                                                                                                                                                                                                                                                                                                                                                                                                                                                                                                                                                                                                                                                              | Sharp HealthCare Laboratory                                                               | Andersen lab at Scripps Research                                                                                                                                                                                                                                                                              | SEARCH Alliance San Diego with Aaron Harding, Jacquelyn Berumen, Cathy Woerle, Liam McGinnis, Art Mendoza, Omid Bakhtar                                                                                                                                                                                                                                                                                                                                                                                                                                                                         |
| EPI_ISL_1366750, EPI_ISL_1366751                                                                                                                                                                                                                                                                                                                                                                                                                                                                                                                                                                                                                                                                                                                                                                                                                                                                                                                                                                                                                                                                                                                                                                                                                                       | San Diego County Public Health Laboratory                                                 | Andersen lab at Scripps Research                                                                                                                                                                                                                                                                              | SEARCH Alliance San Diego with Tracy Basler, Jovan Shephard, Brett Austin                                                                                                                                                                                                                                                                                                                                                                                                                                                                                                                       |
| EPI_ISL_1367239, EPI_ISL_1367241, EPI_ISL_1367253, EPI_ISL_1367257, EPI_ISL_1367261, EPI_ISL_1367262, EPI_ISL_1367263, EPI_ISL_1367267, EPI_ISL_1367273, EPI_ISL_1367277, EPI_ISL_1367278, EPI_ISL_1367281, EPI_ISL_1367282, EPI_ISL_1367283, EPI_ISL_1367286, EPI_ISL_1367288, EPI_ISL_1367290, EPI_ISL_1367293, EPI_ISL_1367300, EPI_ISL_1367302, EPI_ISL_1367307, EPI_ISL_1367311, EPI_ISL_1367312, EPI_ISL_1367314, EPI_ISL_1367315, EPI_ISL_1367319, EPI_ISL_1367321, EPI_ISL_1367324, EPI_ISL_1367326, EPI_ISL_1367328                                                                                                                                                                                                                                                                                                                                                                                                                                                                                                                                                                                                                                                                                                                                           | Centers for Disease Control and Prevention Division of Viral Diseases, Pathogen Discovery | Peter W. Cook, Dakota Howard, Dhvani Batra, Ben L. Rambo-Martin, S. H. Rosenthal, A. Gerasimova, R. M. Kagan, B. Anderson, M. Hua, Y. Liu, L.E. Bernstein, K.E. Livingston, A. Perez, I. A. Shlyakhter, R. V. Rolando, R. Owen, P. Tanpaiboon, F. Lacbawan, Clinton R. Paden, Suxiang Tong, Duncan MacCannell |                                                                                                                                                                                                                                                                                                                                                                                                                                                                                                                                                                                                 |
| see above                                                                                                                                                                                                                                                                                                                                                                                                                                                                                                                                                                                                                                                                                                                                                                                                                                                                                                                                                                                                                                                                                                                                                                                                                                                              | Quest Diagnostics Incorporated                                                            | Centers for Disease Control and Prevention Division of Viral Diseases, Pathogen Discovery                                                                                                                                                                                                                     | Peter W. Cook, Dakota Howard, Dhvani Batra, Ben L. Rambo-Martin, S. H. Rosenthal, A. Gerasimova, R. M. Kagan, B. Anderson, M. Hua, Y. Liu, L.E. Bernstein, K.E. Livingston, A. Perez, I. A. Shlyakhter, R. V. Rolando, R. Owen, P. Tanpaiboon, F. Lacbawan, Clinton R. Paden, Suxiang Tong, Duncan MacCannell                                                                                                                                                                                                                                                                                   |
| EPI_ISL_1373726, EPI_ISL_1373737, EPI_ISL_1373739, EPI_ISL_1373741, EPI_ISL_1373751, EPI_ISL_1373770, EPI_ISL_1373776, EPI_ISL_1373778, EPI_ISL_1373780, EPI_ISL_1373786, EPI_ISL_1373787, EPI_ISL_1373801, EPI_ISL_1373804, EPI_ISL_1373813, EPI_ISL_1373814, EPI_ISL_1373816, EPI_ISL_1373828, EPI_ISL_1373837, EPI_ISL_1373839, EPI_ISL_1373841, EPI_ISL_1373842, EPI_ISL_1373843, EPI_ISL_1373844, EPI_ISL_1373846, EPI_ISL_1373855, EPI_ISL_1373856, EPI_ISL_1373859, EPI_ISL_1373860, EPI_ISL_1373864, EPI_ISL_1373867, EPI_ISL_1373869, EPI_ISL_1373870, EPI_ISL_1373871, EPI_ISL_1373873, EPI_ISL_1373876, EPI_ISL_1373878                                                                                                                                                                                                                                                                                                                                                                                                                                                                                                                                                                                                                                     | CDPH, Viral and Rickettsial Disease Laboratory                                            | Genomics and Discovery, Respiratory Viruses Branch, Division of Viral Diseases, Centers for Disease Control and Prevention                                                                                                                                                                                    | Ying Tao, Jing Zhang, Yan Li, Brian Lynch, Anna Kelleher, Krista Queen, Anna Uehara, Peter Cook, Han Jia Justin Ng, Clinton R. Paden, Haibin Wang, Suxiang Tong                                                                                                                                                                                                                                                                                                                                                                                                                                 |
| see above                                                                                                                                                                                                                                                                                                                                                                                                                                                                                                                                                                                                                                                                                                                                                                                                                                                                                                                                                                                                                                                                                                                                                                                                                                                              | CDPH, Viral and Rickettsial Disease Laboratory                                            | Genomics and Discovery, Respiratory Viruses Branch, Division of Viral Diseases, Centers for Disease Control and Prevention                                                                                                                                                                                    | Ying Tao, Jing Zhang, Yan Li, Brian Lynch, Anna Kelleher, Krista Queen, Anna Uehara, Peter Cook, Han Jia Justin Ng, Clinton R. Paden, Haibin Wang, Suxiang Tong                                                                                                                                                                                                                                                                                                                                                                                                                                 |
| EPI_ISL_1379854                                                                                                                                                                                                                                                                                                                                                                                                                                                                                                                                                                                                                                                                                                                                                                                                                                                                                                                                                                                                                                                                                                                                                                                                                                                        | Stanford Health Care                                                                      | Stanford University School of Medicine, Clinical Virology Laboratory                                                                                                                                                                                                                                          | Mamdouh Sibai, Daniel Solis, Fumiko Yamamoto, Malaya K. Sahoo, Michelle Verghese, ChunHong Huang, James Zehnder, and Benjamin A. Pinsky                                                                                                                                                                                                                                                                                                                                                                                                                                                         |
| EPI_ISL_1379887, EPI_ISL_1379888                                                                                                                                                                                                                                                                                                                                                                                                                                                                                                                                                                                                                                                                                                                                                                                                                                                                                                                                                                                                                                                                                                                                                                                                                                       | Stanford Health Care                                                                      | Stanford University School of Medicine, Clinical Virology Laboratory                                                                                                                                                                                                                                          | Daniel Solis, Mamdouh Sibai, Fumiko Yamamoto, Becky Jiang, Michelle Verghese, ChunHong Huang, James Zehnder, Malaya K. Sahoo, and Benjamin A. Pinsky                                                                                                                                                                                                                                                                                                                                                                                                                                            |
| EPI_ISL_1379889                                                                                                                                                                                                                                                                                                                                                                                                                                                                                                                                                                                                                                                                                                                                                                                                                                                                                                                                                                                                                                                                                                                                                                                                                                                        | Stanford Health Care                                                                      | Stanford University School of Medicine, Clinical Virology Laboratory                                                                                                                                                                                                                                          | Michelle Verghese, Becky Jiang, Naomi Iwai, Marilyn Mar, Malaya K. Sahoo, Fumiko Yamamoto, Kenji O. Mfuh, Jacob Miller, Hannah Wang, James Zehnder, and Benjamin A. Pinsky                                                                                                                                                                                                                                                                                                                                                                                                                      |
| EPI_ISL_1379958, EPI_ISL_1379962, EPI_ISL_1379963, EPI_ISL_1379964, EPI_ISL_1379965, EPI_ISL_1379966, EPI_ISL_1379967, EPI_ISL_1379968, EPI_ISL_1379969, EPI_ISL_1379970, EPI_ISL_1379972, EPI_ISL_1379973, EPI_ISL_1379974, EPI_ISL_1379975                                                                                                                                                                                                                                                                                                                                                                                                                                                                                                                                                                                                                                                                                                                                                                                                                                                                                                                                                                                                                           | UCLA Clinical Micro Lab                                                                   | Los Angeles County PHL                                                                                                                                                                                                                                                                                        | P. Hemarajata et al.                                                                                                                                                                                                                                                                                                                                                                                                                                                                                                                                                                            |
| see above                                                                                                                                                                                                                                                                                                                                                                                                                                                                                                                                                                                                                                                                                                                                                                                                                                                                                                                                                                                                                                                                                                                                                                                                                                                              | UCLA Clinical Micro Lab                                                                   | Los Angeles County PHL                                                                                                                                                                                                                                                                                        | P. Hemarajata et al.                                                                                                                                                                                                                                                                                                                                                                                                                                                                                                                                                                            |
| EPI_ISL_1391608                                                                                                                                                                                                                                                                                                                                                                                                                                                                                                                                                                                                                                                                                                                                                                                                                                                                                                                                                                                                                                                                                                                                                                                                                                                        | Quest Diagnostics Incorporated                                                            | Centers for Disease Control and Prevention Division of Viral Diseases, Pathogen Discovery                                                                                                                                                                                                                     | Peter W. Cook, Dakota Howard, Dhvani Batra, Ben L. Rambo-Martin, S. H. Rosenthal, A. Gerasimova, R. M. Kagan, B. Anderson, M. Hua, Y. Liu, L.E. Bernstein, K.E. Livingston, A. Perez, I. A. Shlyakhter, R. V. Rolando, R. Owen, P. Tanpaiboon, F. Lacbawan, Clinton R. Paden, Suxiang Tong, Duncan MacCannell                                                                                                                                                                                                                                                                                   |
| EPI_ISL_1391729, EPI_ISL_1391750, EPI_ISL_1391777, EPI_ISL_1391778, EPI_ISL_1391782, EPI_ISL_1391808, EPI_ISL_1391814, EPI_ISL_1391865, EPI_ISL_1391888, EPI_ISL_1391895, EPI_ISL_1391905, EPI_ISL_1391919, EPI_ISL_1391939, EPI_ISL_1391943, EPI_ISL_1391949, EPI_ISL_1391995                                                                                                                                                                                                                                                                                                                                                                                                                                                                                                                                                                                                                                                                                                                                                                                                                                                                                                                                                                                         | Helix/Illumina                                                                            | Centers for Disease Control and Prevention Division of Viral Diseases, Pathogen Discovery                                                                                                                                                                                                                     | Peter W. Cook, Dakota Howard, Dhvani Batra, Ben L. Rambo-Martin, Eileen de Feo, Jan Antico, Christine Tran, Matthew Tolentino, Shannon Wickline, Kim Gietzen, Brad Sickler, Jingtao Liu, Eric Allen, Phil Febbo, Summer Galloway, Nicole L. Washington, Simon White, Geraint Levan, Kelly Schiabor Barrett, Elizabeth Cirulli, Alexandre Bolze, Ary Ascencio, Charlotte Rivera-Garcia, Ryan Cho, Jason Nguyen, Sherry Wang, Jimmy Ramirez, Tyler Cassens, Efrén Sandoval, Magnus Isaksson, William Lee, David Becker, Marc Laurent, James Lu, Clinton R. Paden, Suxiang Tong, Duncan MacCannell |
| see above                                                                                                                                                                                                                                                                                                                                                                                                                                                                                                                                                                                                                                                                                                                                                                                                                                                                                                                                                                                                                                                                                                                                                                                                                                                              | Helix/Illumina                                                                            | Centers for Disease Control and Prevention Division of Viral Diseases, Pathogen Discovery                                                                                                                                                                                                                     | Peter W. Cook, Dakota Howard, Dhvani Batra, Ben L. Rambo-Martin, Eileen de Feo, Jan Antico, Christine Tran, Matthew Tolentino, Shannon Wickline, Kim Gietzen, Brad Sickler, Jingtao Liu, Eric Allen, Phil Febbo, Summer Galloway, Nicole L. Washington, Simon White, Geraint Levan, Kelly Schiabor Barrett, Elizabeth Cirulli, Alexandre Bolze, Ary Ascencio, Charlotte Rivera-Garcia, Ryan Cho, Jason Nguyen, Sherry Wang, Jimmy Ramirez, Tyler Cassens, Efrén Sandoval, Magnus Isaksson, William Lee, David Becker, Marc Laurent, James Lu, Clinton R. Paden, Suxiang Tong, Duncan MacCannell |
| EPI_ISL_1402587, EPI_ISL_1402588, EPI_ISL_1402589, EPI_ISL_1402591, EPI_ISL_1402592, EPI_ISL_1402597, EPI_ISL_1402598, EPI_ISL_1402599, EPI_ISL_1402600, EPI_ISL_1402601, EPI_ISL_1402602, EPI_ISL_1402603, EPI_ISL_1402604, EPI_ISL_1402606, EPI_ISL_1402607, EPI_ISL_1402608, EPI_ISL_1402609, EPI_ISL_1402610, EPI_ISL_1402611, EPI_ISL_1402612, EPI_ISL_1402613, EPI_ISL_1402614, EPI_ISL_1402617, EPI_ISL_1402618, EPI_ISL_1402621, EPI_ISL_1402622, EPI_ISL_1402623, EPI_ISL_1402624, EPI_ISL_1402625, EPI_ISL_1402626, EPI_ISL_1402628, EPI_ISL_1402629, EPI_ISL_1402632, EPI_ISL_1402633, EPI_ISL_1402634, EPI_ISL_1402636, EPI_ISL_1402637, EPI_ISL_1402638, EPI_ISL_1402639, EPI_ISL_1402640, EPI_ISL_1402641, EPI_ISL_1402642, EPI_ISL_1402643, EPI_ISL_1405050, EPI_ISL_1405051, EPI_ISL_1405052, EPI_ISL_1405668, EPI_ISL_1405669, EPI_ISL_1405670, EPI_ISL_1405671, EPI_ISL_1405672, EPI_ISL_1405673, EPI_ISL_1405674, EPI_ISL_1405675, EPI_ISL_1405676, EPI_ISL_1405678, EPI_ISL_1405679                                                                                                                                                                                                                                                                | UCSC Genomics Institute                                                                   | UCSC Genomics Institute                                                                                                                                                                                                                                                                                       | Mark Akeson, Ikenna Anigbogu, Eric Beraut, Isabel Bjork, Molly Cassatt-Johnstone, Terren Chang, Russell Corbett-Detig, Namrita Dhillon, Maximilian Haeussler, David Hausssler, Angie Hinrichs, Miten Jain, Joshua Kapp, A. Marm Kilpatrick, Jakob McBroome, Hugh Olsen, Jeremy Sanford, Beth Shapiro, Michael Stone, Bryan Thornlow, Yatish Turakhia                                                                                                                                                                                                                                            |
| see above                                                                                                                                                                                                                                                                                                                                                                                                                                                                                                                                                                                                                                                                                                                                                                                                                                                                                                                                                                                                                                                                                                                                                                                                                                                              | UCSC Genomics Institute                                                                   | UCSC Genomics Institute                                                                                                                                                                                                                                                                                       | Mark Akeson, Ikenna Anigbogu, Eric Beraut, Isabel Bjork, Molly Cassatt-Johnstone, Terren Chang, Russell Corbett-Detig, Namrita Dhillon, Maximilian Haeussler, David Hausssler, Angie Hinrichs, Miten Jain, Joshua Kapp, A. Marm Kilpatrick, Jakob McBroome, Hugh Olsen, Jeremy Sanford, Beth Shapiro, Michael Stone, Bryan Thornlow, Yatish Turakhia                                                                                                                                                                                                                                            |
| EPI_ISL_1406168, EPI_ISL_1406169                                                                                                                                                                                                                                                                                                                                                                                                                                                                                                                                                                                                                                                                                                                                                                                                                                                                                                                                                                                                                                                                                                                                                                                                                                       | Santa Clara County Public Health Laboratory                                               | Santa Clara County Public Health Laboratory                                                                                                                                                                                                                                                                   | Santa Clara County Public Health Department                                                                                                                                                                                                                                                                                                                                                                                                                                                                                                                                                     |
